# Supplementary material for: Redistribution of charge in a 2D/1D BiOBr/Bi2O2S heterojunction for the photoelectrocatalytic oxidation of organic pollutants in water
Source: Royal Society of Chemistry journal article supplement (doi:10.1039/d5ra03795f), 2025-01-01
Supplement: d5ra03795f1.pdf [file d5ra03795f1.pdf]

## SUPPORTING INFORMATION

### Redistribution of charge in a 2D/1D BiOBr/Bi<sub>2</sub>O<sub>2</sub>S heterojunction for the photoelectrocatalytic oxidation of organic pollutants in water

Kehinde D Jayeola<sup>a,b</sup>, Dimpo S Sipuka<sup>a,b</sup>, Tsholofelo I. Sebokolodi<sup>a,b</sup>, Jonathan O. Babalola<sup>c,d</sup>, Yumeng Zhao<sup>e</sup>, Omotayo A. Arotiba<sup>a,b,\*</sup>

<sup>a</sup> Department of Chemical Sciences, University of Johannesburg, Doornfontein Johannesburg, South Africa

<sup>b</sup> Centre for Nanomaterials Science Research, University of Johannesburg, South Africa

<sup>c</sup> Department of Chemistry, University of Ibadan, Ibadan, Nigeria

<sup>d</sup> Bowen University, Iwo, Osun State, Nigeria

<sup>e</sup> State Key Laboratory of Urban Water Resource and Environment, Harbin Institute of Technology, Harbin 150090, China

Corresponding Author: oarotiba@uj.ac.za

#### Photoelectrochemical measurement and degradation

The photoelectrochemical measurement and degradation method used for this work has been reported in our previous work <sup>1</sup>.

Photoelectrochemical measurements, including electrochemical impedance spectroscopy (EIS), photocurrent response, and Mott-Schottky measurements, were conducted using an Autolab PGSTAT204 potentiostat/galvanostat (Netherlands) employing a three-electrode setup. The fabricated electrodes served as the working electrode, while a platinum wire functioned as the counter electrode, and an Ag/AgCl (3 M KCl) electrode was employed as the reference electrode. The photoanode was exposed to irradiation from a 100 W solar simulator (Oriel LCA-100 model, USA), with a light density of 0.1 W/cm<sup>2</sup>. For EIS, measurements were performed in a solution containing a 5 mM [Fe(CN)<sub>6</sub>]<sup>3/4-</sup> in 0.1 M KCl with a +0.25 V vs. Ag/AgCl applied potential, covering a frequency range from 100 kHz to 0.1 Hz. Mott-Schottky measurements were recorded in the absence of light using a 5 mM [Fe(CN)<sub>6</sub>]<sup>3/4-</sup> in 0.1 M KCl solution as the electrolyte. Photocurrent response data were evaluated under both dark and light conditions using a 0.1 M Na<sub>2</sub>SO<sub>4</sub> solution, with an applied potential of 1.5 V vs. Ag/AgCl.

In a two- electrode system, the BiOBr/Bi<sub>2</sub>O<sub>2</sub>S photoanode as the working electrode and a platinum sheet was used as the cathode, the degradation experiments of the BiOBr/Bi<sub>2</sub>O<sub>2</sub>S photoanode were

conducted using a 50 mL quartz reaction cell containing 5 mg/L of sulfamethoxazole in 0.1 M Na<sub>2</sub>SO<sub>4</sub>. With an anode-cathode spacing of 3 cm, the photoanode was irradiated under a 100 W Xenon Lamp and the degradation efficiency of the pristine photoanodes and the composite photoanode were compared. The effects of pH and current density on the photoelectrochemical performance of the PEC process were examined. And, aliquots of the samples are collected at different time intervals using a disposable syringe and analysed using a UV-vis spectrophotometer.

The degradation efficiency of BiOBr/Bi<sub>2</sub>O<sub>2</sub>S photoanode was calculated using the formula Equation S1:

$$\text{Percentage degradation efficiency} = \frac{C_o - C_t}{C_o} * 100 \quad \text{Eq. S1}$$

Where C<sub>o</sub>= Initial concentration and C<sub>t</sub> = Concentration at time t.

The percentage removal of total organic carbon was obtained with the formula in Equation S2

$$\text{Percentage extent of mineralisation (\%)} = \frac{TOC_o - TOC_t}{TOC_o} * 100 \quad \text{Eq. S2}$$

Where TOC<sub>o</sub>= Initial value before treatment and TOC<sub>t</sub> = Final TOC after treatment at a particular time.

The main reactive species responsible for the degradation of ciprofloxacin over BiOBr/Bi<sub>2</sub>O<sub>2</sub>S photoanode via a free radical quenching experiment. Hydroxyl radicals, superoxide radicals, and photogenerated holes were trapped using 2 mM tert-butanol, 2 mM acrylamide, and 2 mM sodium ethylenediaminetetraacetate (EDTA) respectively.

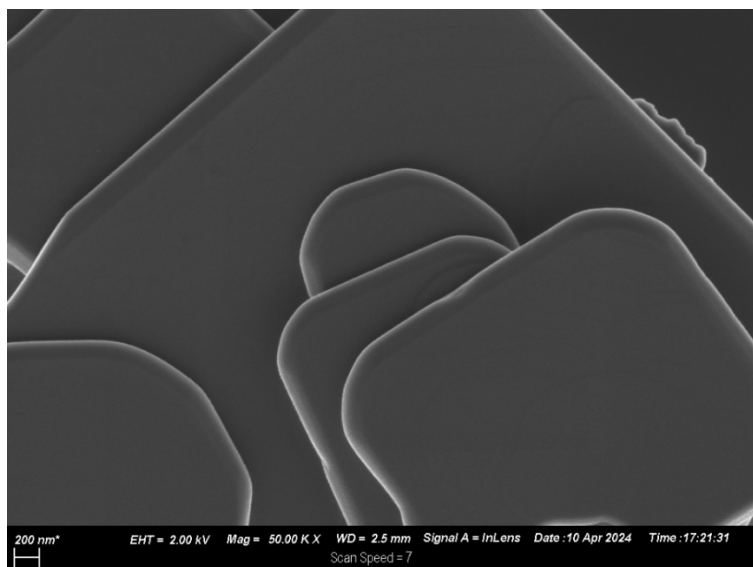

Figure S1: FESEM micrograph of BiOBr

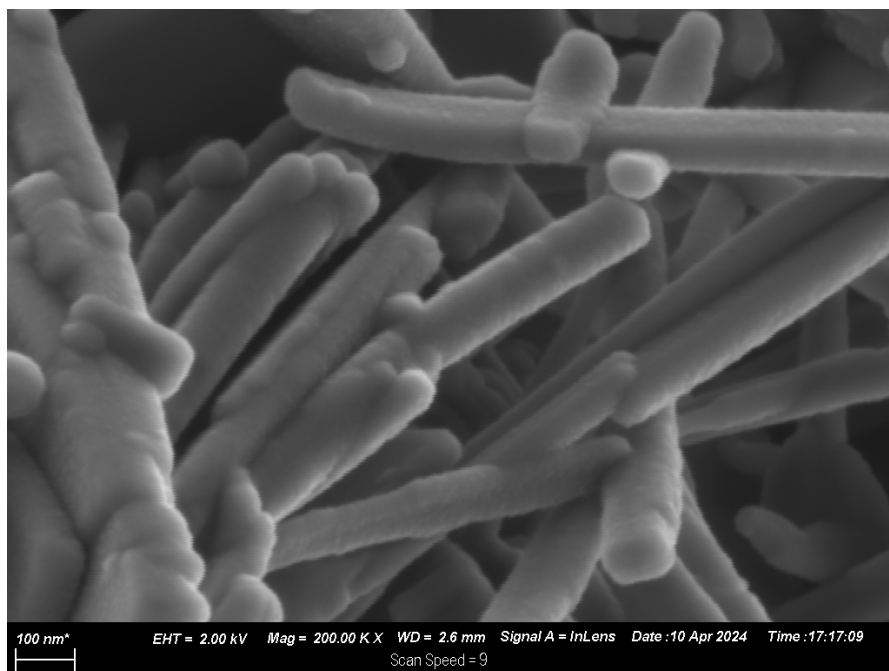

Figure S2: FESEM micrograph of Bi<sub>2</sub>O<sub>2</sub>S

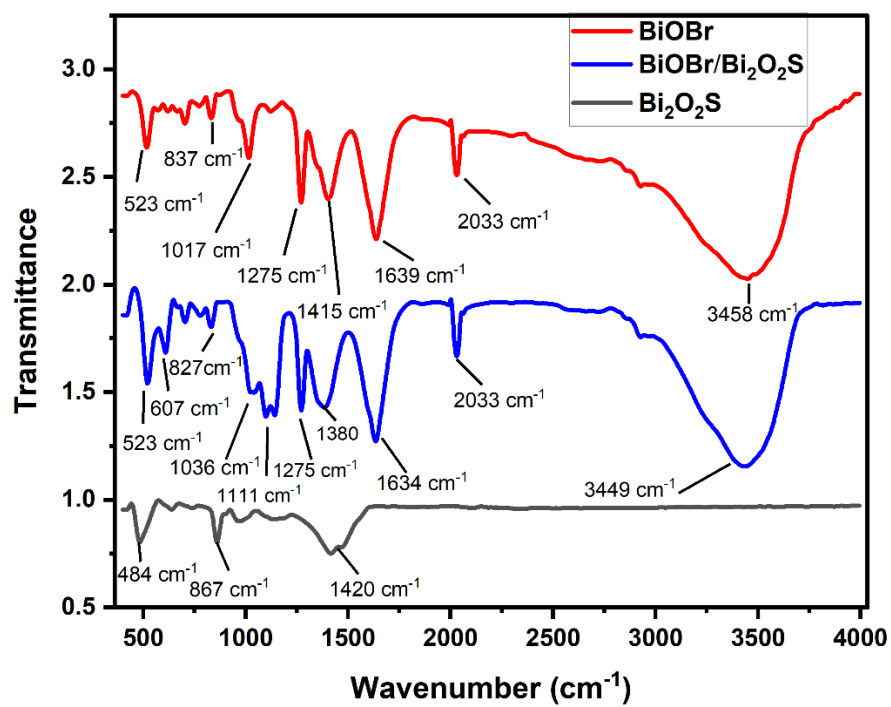

Figure S3: FTIR spectra of  $\text{Bi}_2\text{O}_2\text{S}$ , BiOBr, and BiOBr/  $\text{Bi}_2\text{O}_2\text{S}$

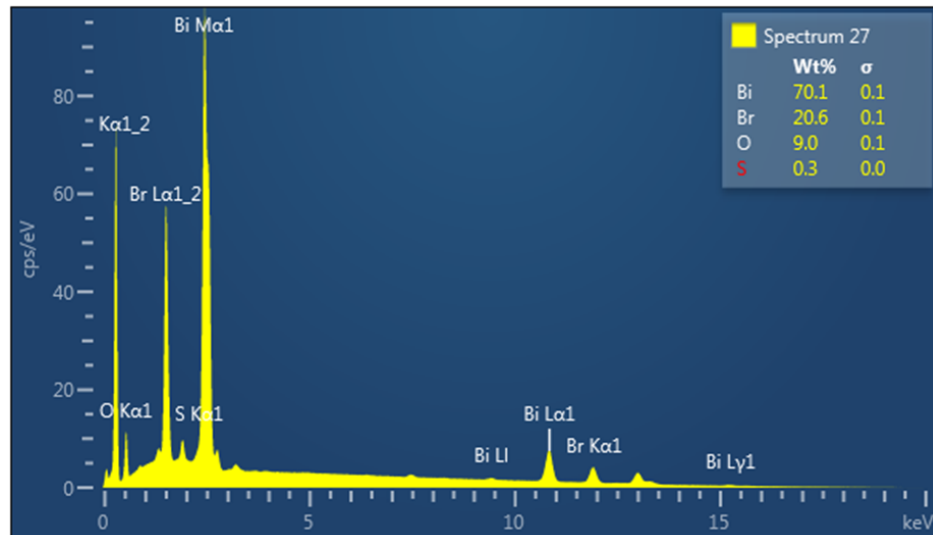

Figure S4: FESEM-EDX spectra of BiOBr/ $\text{Bi}_2\text{O}_2\text{S}$

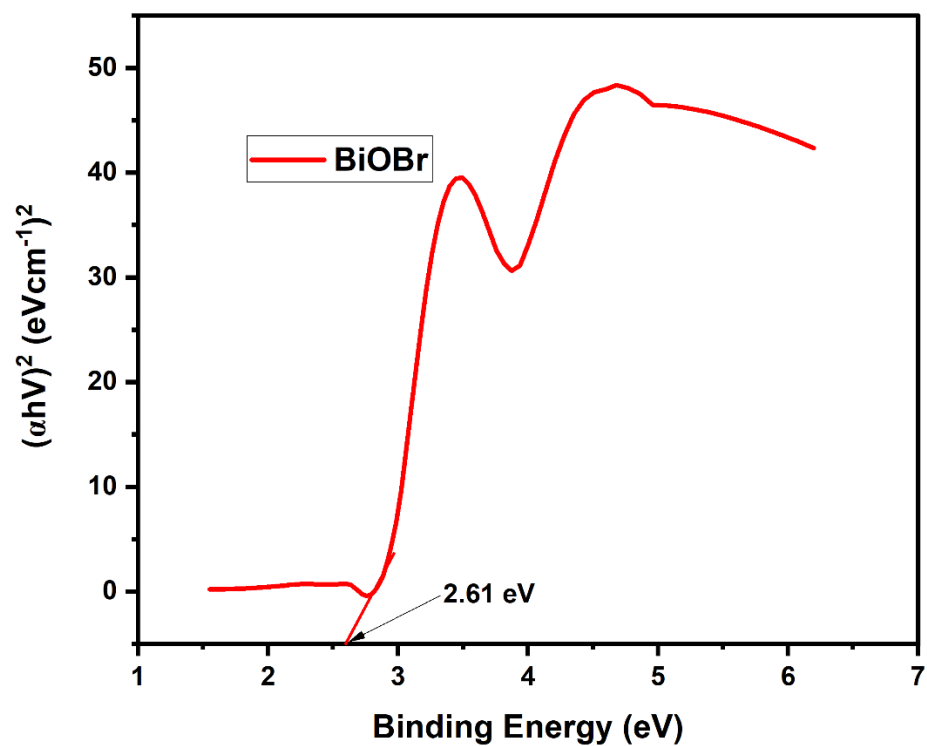

Figure S5: Tauc plot of BiOBr

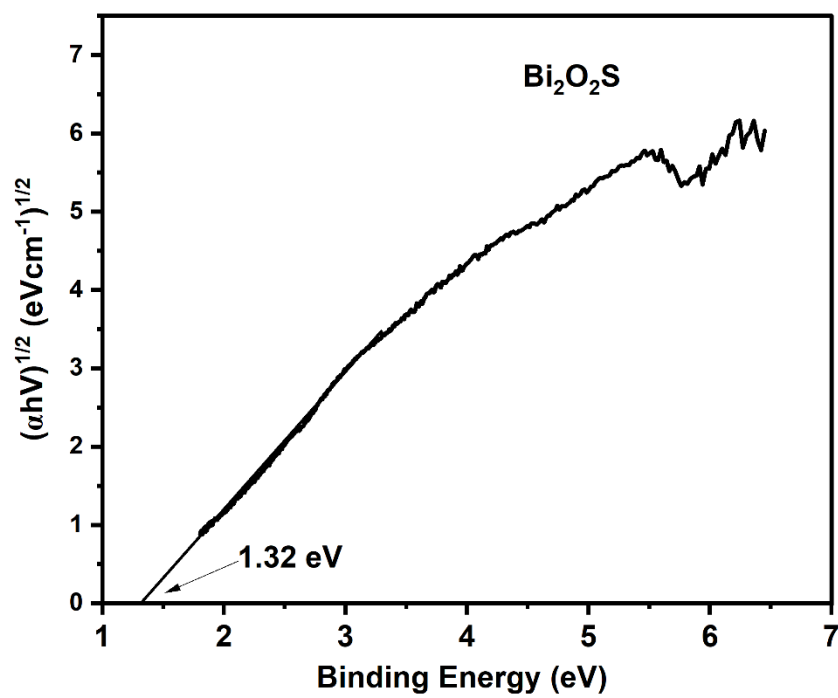

Figure S6: Tauc plot of Bi<sub>2</sub>O<sub>2</sub>S

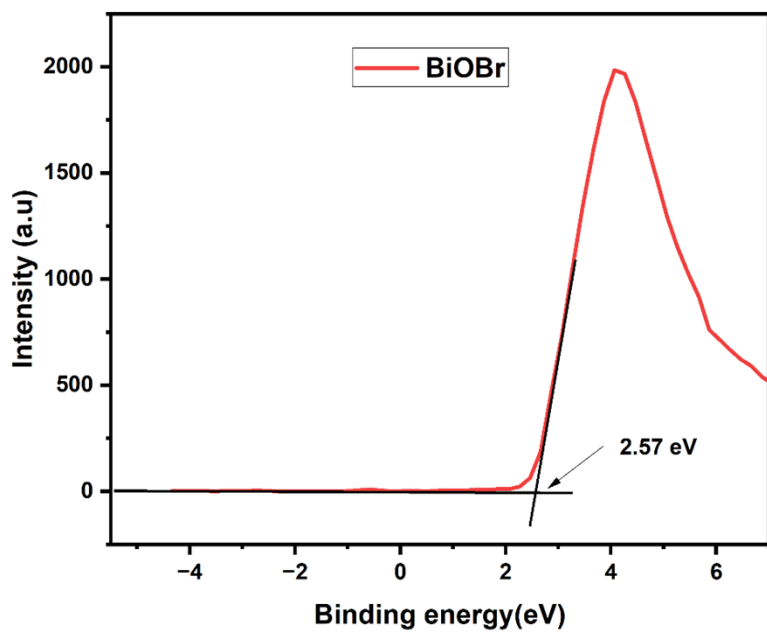

Figure S7: XPS valence spectra of BiOBr

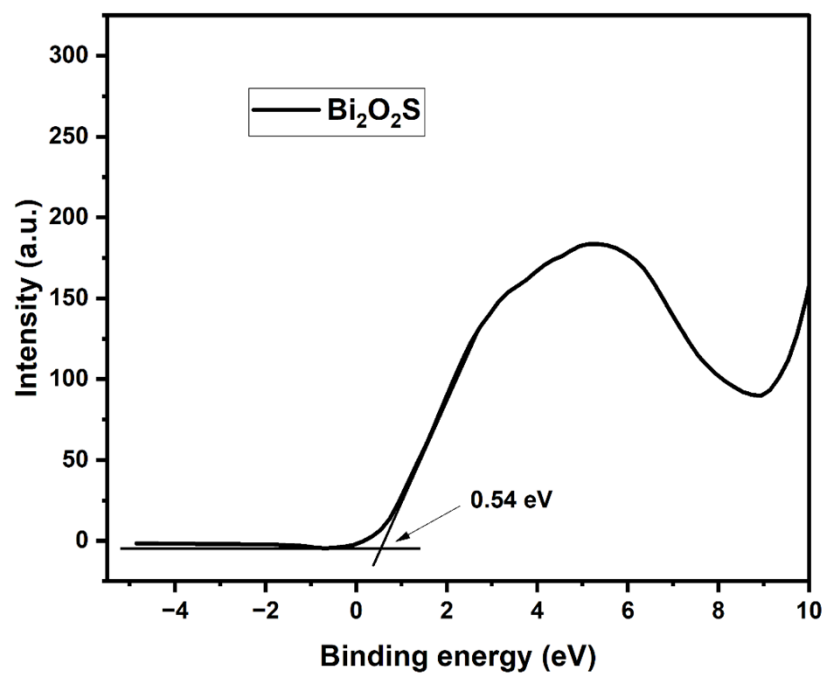

Figure S8: XPS valence spectra of Bi<sub>2</sub>O<sub>2</sub>S

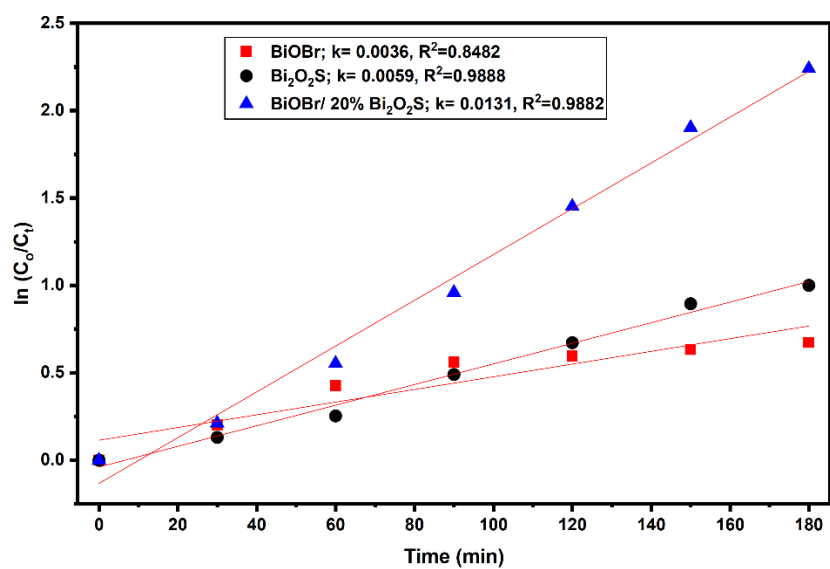

Figure S9: Kinetic studies of BiOBr, Bi<sub>2</sub>O<sub>2</sub>S & BiOBr/20% Bi<sub>2</sub>O<sub>2</sub>S for the degradation of Ciprofloxacin

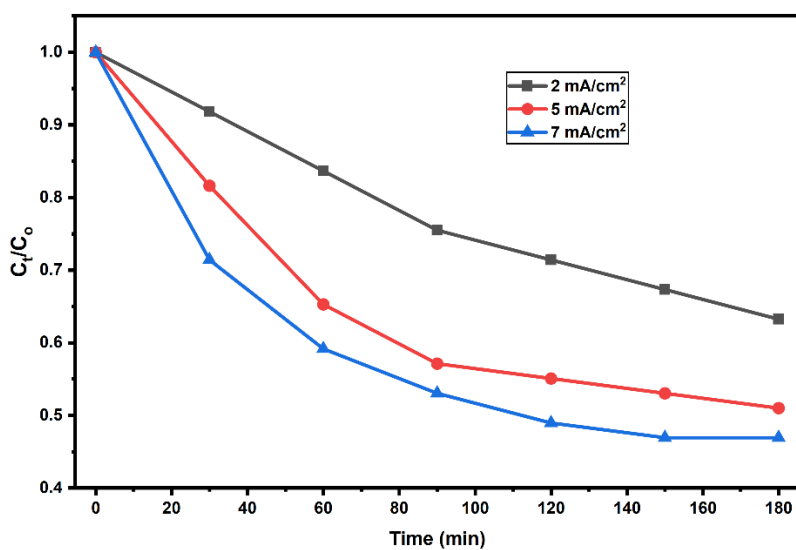

Figure S10: Effect of current density using BiOBr for the degradation of Ciprofloxacin

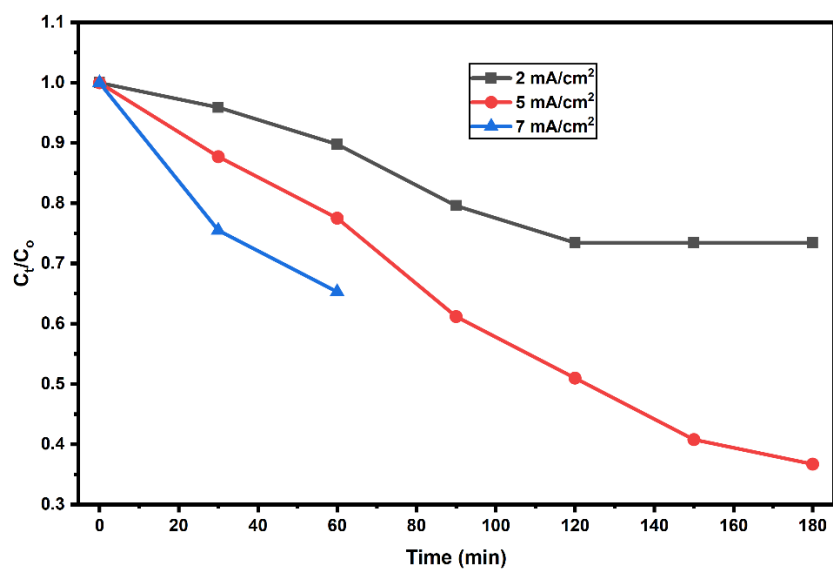

Figure S11: Effect of current density using Bi<sub>2</sub>O<sub>2</sub>S for the degradation of Ciprofloxacin

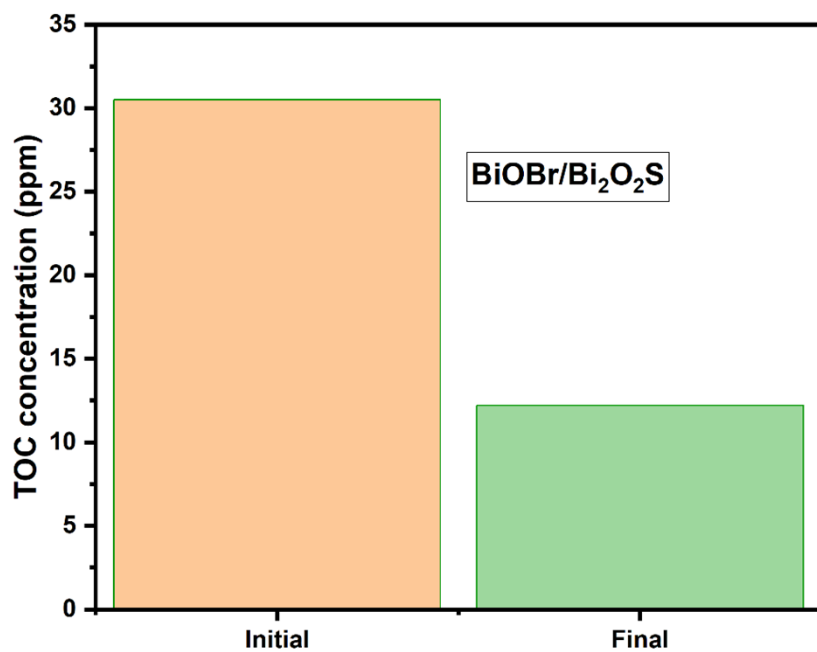

Figure S12: Total organic carbon removal of ciprofloxacin over BiOBr/Bi<sub>2</sub>O<sub>2</sub>S photoanode



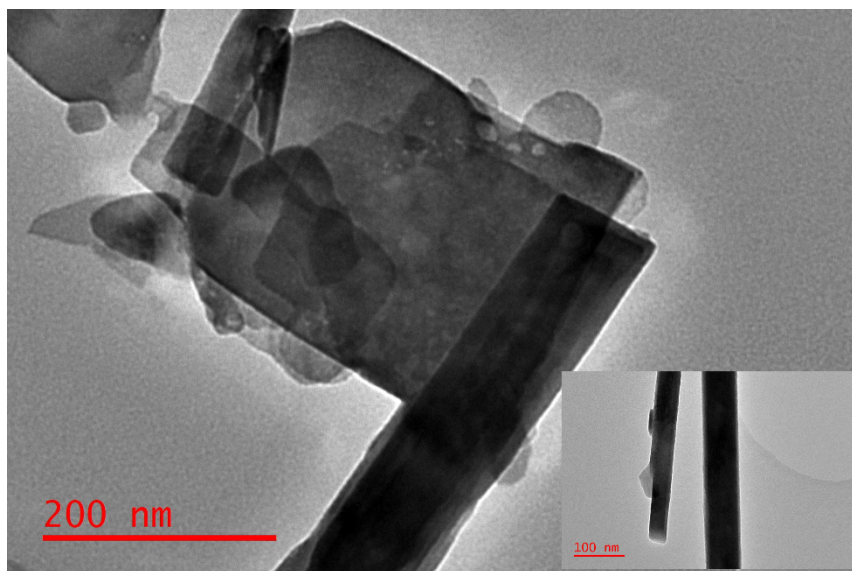

Figure S13: TEM micrograph of BiOBr/Bi<sub>2</sub>O<sub>2</sub>S photoanode after degradation

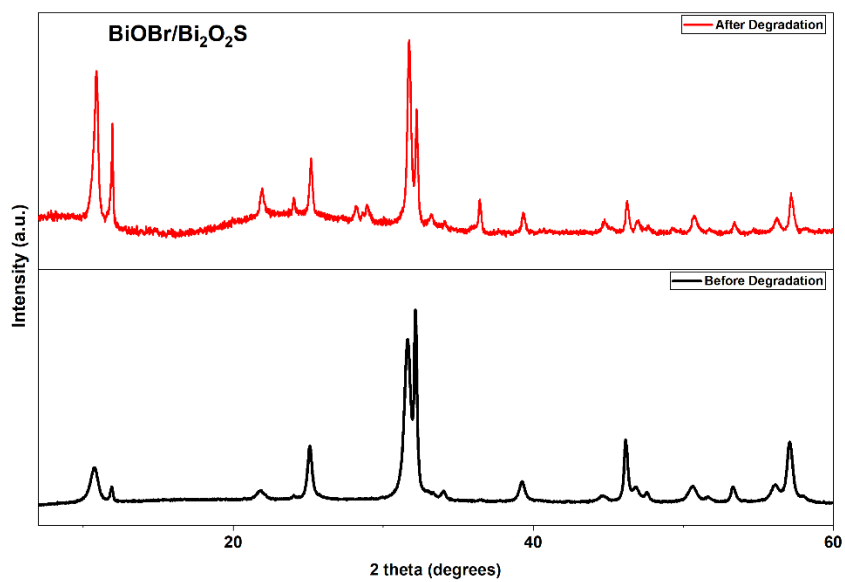

Figure S14: XRD analysis of BiOBr/Bi<sub>2</sub>O<sub>2</sub>S photoanode after degradation

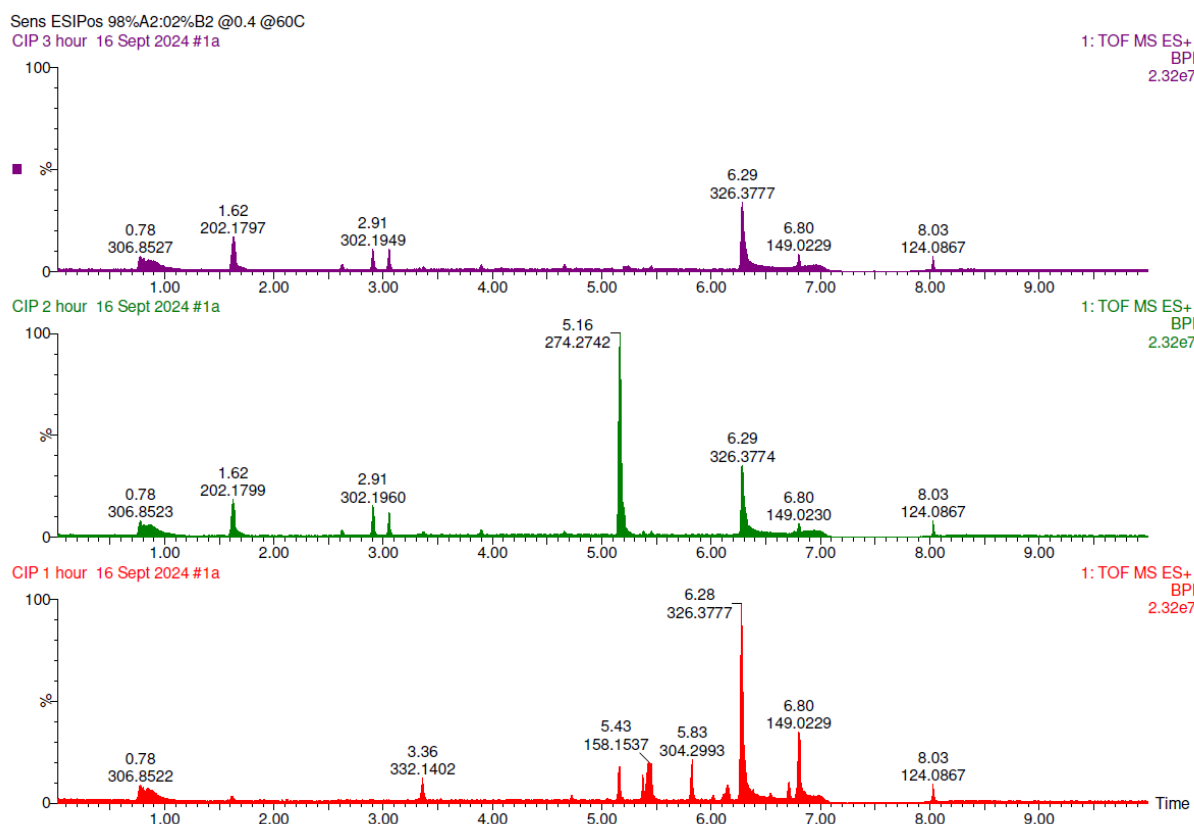

Figure S15: UPLC-MS spectra of the degradation of CIP over BiOBr/ Bi<sub>2</sub>O<sub>2</sub>S

## References

1. K. D. Jayeola, D. S. Sipuka, T. I. Sebokolodi, O. V. Nkwachukwu, C. Muzenda, B. A. Koiki, J. O. Babalola, M. Zhou and O. A. Arotiba, *Chemical Engineering Journal*, 2024, **479**, 147482.
