# Supplementary material for: Redistribution of charge in a 2D/1D BiOBr/Bi2O2S heterojunction for the photoelectrocatalytic oxidation of organic pollutants in water
Source: RSC Adv. 2025 Aug 21;15(36):29680–91. doi: 10.1039/d5ra03795f (PMC12377251; doi:10.1039/d5ra03795f)
Supplement: RA-015-D5RA03795F-s002 [file RA-015-D5RA03795F-s002.xlsx]

## Sheet: Sheet1
	BiOBr		0.05		0.1		0.2		0.3		Bi2O2S
0.43988	0.00115	0.43988	0.000312714	0.46787	0.000830994	0.48688	0.000836792	0.50688	0.00034903	0.50688	0.000109738
0.44988	0.000528564	0.44988	0.000241486	0.47787	0.000543823	0.49688	0.000550232	0.51688	0.000223541	0.51688	0.000110557
0.45988	0.00038385	0.45988	0.000215149	0.48787	0.000431305	0.50688	0.000440186	0.52688	0.000179596	0.52688	0.00011071
0.46988	0.000316193	0.46988	0.000200378	0.49787	0.000369293	0.51688	0.000379425	0.53688	0.000156006	0.53688	0.00011119
0.47988	0.000275696	0.47988	0.000190582	0.50787	0.000329468	0.52688	0.000340332	0.54688	0.0001409	0.54688	0.000110644
0.48988	0.000248016	0.48988	0.000183258	0.51787	0.000301453	0.53688	0.000312469	0.55688	0.000130005	0.55688	0.000111125
0.49988	0.000227661	0.49988	0.000177734	0.52787	0.000280334	0.54688	0.000291504	0.56688	0.000121979	0.56688	0.000110579
0.50988	0.000211548	0.50988	0.000173279	0.53787	0.00026358	0.55688	0.000274597	0.57688	0.000115631	0.57688	0.000111048
0.51988	0.000198792	0.51988	0.000169647	0.54787	0.000250122	0.56688	0.000261139	0.58688	0.000110565	0.58688	0.000110513
0.52988	0.00018808	0.52988	0.000166473	0.55787	0.000239014	0.57688	0.000249756	0.59688	0.000106354	0.59688	0.000110983
0.53988	0.000179077	0.53988	0.000163757	0.56787	0.000229584	0.58688	0.000240143	0.60688	0.000102783	0.60688	0.000110459
0.54988	0.000171204	0.54988	0.000161346	0.57787	0.000221436	0.59688	0.00023175	0.61688	9.97009e-05	0.61688	0.000110917
0.55988	0.000164398	0.55988	0.000159271	0.58787	0.000214325	0.60688	0.000224457	0.62688	9.70459e-05	0.62688	0.000110393
0.56988	0.000158234	0.56988	0.000157379	0.59787	0.000208069	0.61688	0.000217926	0.63688	9.46655e-05	0.63688	0.000110852
0.57988	0.000152832	0.57988	0.00015567	0.60787	0.000202515	0.62688	0.000212067	0.64688	9.25903e-05	0.64688	0.000110317
0.58988	0.000147827	0.58988	0.000154114	0.61787	0.00019751	0.63688	0.000206757	0.65688	9.06982e-05	0.65688	0.000110775
0.59988	0.000143341	0.59988	0.000152679	0.62787	0.000192932	0.64688	0.000202026	0.66688	8.89587e-05	0.66688	0.000110262
0.60988	0.000139191	0.60988	0.000151337	0.63787	0.000188812	0.65688	0.000197601	0.67688	8.74634e-05	0.67688	0.00011071
0.61988	0.000135406	0.61988	0.000150116	0.64787	0.000184998	0.66688	0.000193542	0.68688	8.59985e-05	0.68688	0.000110196
0.62988	0.000131805	0.62988	0.000149017	0.65787	0.000181519	0.67688	0.000189819	0.69688	8.47168e-05	0.69688	0.000110655
0.63988	0.00012854	0.63988	0.000147888	0.66787	0.000178284	0.68688	0.00018634	0.70688	8.34961e-05	0.70688	0.000110153
0.64988	0.000125397	0.64988	0.000146942	0.67787	0.000175262	0.69688	0.000183105	0.71688	8.23975e-05	0.71688	0.0001106
0.65988	0.000122559	0.65988	0.000145996	0.68787	0.000172485	0.70688	0.000180115	0.72688	8.13293e-05	0.72688	0.000110098
0.66988	0.000119781	0.66988	0.000145142	0.69787	0.000169891	0.71688	0.000177277	0.73688	8.03223e-05	0.73688	0.000110535
0.67988	0.000117218	0.67988	0.000144318	0.70787	0.00016745	0.72688	0.000174591	0.74688	7.94067e-05	0.74688	0.000110033
0.68988	0.000114746	0.68988	0.000143524	0.71787	0.000165161	0.73688	0.000172089	0.75688	7.85522e-05	0.75688	0.000110448
0.69988	0.000112457	0.69988	0.000142761	0.72787	0.000162933	0.74688	0.000169769	0.76688	7.77283e-05	0.76688	0.000109956
0.70988	0.000110199	0.70988	0.00014209	0.73787	0.000160919	0.75688	0.000167511	0.77688	7.69653e-05	0.77688	0.000110382
0.71988	0.000108154	0.71988	0.000141418	0.74787	0.000158966	0.76688	0.000165405	0.78688	7.62024e-05	0.78688	0.000109891
0.72988	0.00010614	0.72988	0.000140778	0.75787	0.000157166	0.77688	0.000163361	0.79688	7.55005e-05	0.79688	0.000110317
0.73988	0.000104218	0.73988	0.000140167	0.76787	0.000155396	0.78688	0.000161438	0.80688	7.48596e-05	0.80688	0.000109836
0.74988	0.000102386	0.74988	0.000139587	0.77787	0.000153778	0.79688	0.000159637	0.81688	7.41882e-05	0.81688	0.00011024
0.75988	0.000100616	0.75988	0.000139008	0.78787	0.000152161	0.80688	0.000157837	0.82688	7.36084e-05	0.82688	0.000109771
0.76988	9.8877e-05	0.76988	0.000138458	0.79787	0.000150665	0.81688	0.000156189	0.83688	7.2998e-05	0.83688	0.000110186
0.77988	9.729e-05	0.77988	0.00013797	0.80787	0.0001492	0.82688	0.000154602	0.84688	7.24487e-05	0.84688	0.000109705
0.78988	9.57031e-05	0.78988	0.000137451	0.81787	0.000147888	0.83688	0.000153015	0.85688	7.18994e-05	0.85688	0.000110109
0.79988	9.42078e-05	0.79988	0.000136993	0.82787	0.000146515	0.84688	0.00015155	0.86688	7.14111e-05	0.86688	0.000109651
0.80988	9.27429e-05	0.80988	0.000136505	0.83787	0.000145264	0.85688	0.000150116	0.87688	7.08923e-05	0.87688	0.000110044
0.81988	9.13696e-05	0.81988	0.000136078	0.84787	0.000144012	0.86688	0.000148773	0.88688	7.04041e-05	0.88688	0.000109574
0.82988	8.99658e-05	0.82988	0.000135651	0.85787	0.000142853	0.87688	0.00014743	0.89688	6.99158e-05	0.89688	0.000109978
0.83988	8.86536e-05	0.83988	0.000135254	0.86787	0.000141693	0.88688	0.000146179	0.90688	6.9519e-05	0.90688	0.000109519
0.84988	8.73413e-05	0.84988	0.000134827	0.87787	0.000140656	0.89688	0.000144897	0.91688	6.90613e-05	0.91688	0.000109902
0.85988	8.61511e-05	0.85988	0.00013443	0.88787	0.000139587	0.90688	0.000143738	0.92688	6.86646e-05	0.92688	0.000109443
0.86988	8.48999e-05	0.86988	0.000134064	0.89787	0.000138611	0.91688	0.000142578	0.93688	6.82373e-05	0.93688	0.000109836
0.87988	8.37708e-05	0.87988	0.000133698	0.90787	0.000137573	0.92688	0.000141479	0.94688	6.78711e-05	0.94688	0.000109378
0.88988	8.26111e-05	0.88988	0.000133301	0.91787	0.000136658	0.93688	0.000140411	0.95688	6.74744e-05	0.95688	0.00010976
0.89988	8.1543e-05	0.89988	0.000132996	0.92787	0.000135712	0.94688	0.000139404	0.96688	6.71082e-05	0.96688	0.000109323
0.90988	8.04138e-05	0.90988	0.00013266	0.93787	0.000134857	0.95688	0.000138367	0.97688	6.67419e-05	0.97688	0.000109705
0.91988	7.94067e-05	0.91988	0.000132385	0.94787	0.000133972	0.96688	0.00013739	0.98688	6.64063e-05	0.98688	0.000109268
0.92988	7.83997e-05	0.92988	0.000131989	0.95787	0.000133148	0.97688	0.000136414	0.99688	6.60706e-05	0.99688	0.000109651
0.93988	7.74536e-05	0.93988	0.000131714	0.96787	0.000132294	0.98688	0.000135498	1.00688	6.57654e-05	1.00688	0.000109225
0.94988	7.64465e-05	0.94988	0.000131409	0.97787	0.000131561	0.99688	0.000134613	1.01688	6.54297e-05	1.01688	0.000109596
0.95988	7.55615e-05	0.95988	0.000131165	0.98787	0.000130737	1.00688	0.000133759	1.02688	6.51245e-05	1.02688	0.000109159
0.96988	7.46155e-05	0.96988	0.000130859	0.99787	0.000130066	1.01688	0.000132843	1.03688	6.48193e-05	1.03688	0.000109519
0.97988	7.3761e-05	0.97988	0.000130585	1.00787	0.000129303	1.02688	0.00013208	1.04688	6.45142e-05	1.04688	0.000109094
0.98988	7.28455e-05	0.98988	0.000130341	1.01787	0.000128632	1.03688	0.000131226	1.05688	6.42395e-05	1.05688	0.000109454
0.99988	7.20215e-05	0.99988	0.000130035	1.02787	0.00012793	1.04688	0.000130493	1.06688	6.39648e-05	1.06688	0.000109028
1.00988	7.1167e-05	1.00988	0.000129822	1.03787	0.000127289	1.05688	0.0001297	1.07688	6.36902e-05	1.07688	0.000109399
1.01988	7.03735e-05	1.01988	0.000129517	1.04787	0.000126617	1.06688	0.000128967	1.08688	6.3446e-05	1.08688	0.000108984
1.02988	6.95496e-05	1.02988	0.000129272	1.05787	0.000126007	1.07688	0.000128204	1.09688	6.32019e-05	1.09688	0.000109334
1.03988	6.88171e-05	1.03988	0.000129059	1.06787	0.000125366	1.08688	0.000127563	1.10688	6.29272e-05	1.10688	0.000108919
1.04988	6.80237e-05	1.04988	0.000128815	1.07787	0.000124756	1.09688	0.000126801	1.11688	6.26831e-05	1.11688	0.000109268
1.05988	6.73218e-05	1.05988	0.000128571	1.08787	0.000124176	1.10688	0.00012616	1.12688	6.2439e-05	1.12688	0.000108853
1.06988	6.65588e-05	1.06988	0.000128357	1.09787	0.000123627	1.11688	0.000125458	1.13688	6.21948e-05	1.13688	0.000109203
1.07988	6.5918e-05	1.07988	0.000128113	1.10787	0.000123047	1.12688	0.000124847	1.14688	6.19812e-05	1.14688	0.000108788
1.08988	6.5155e-05	1.08988	0.00012793	1.11787	0.000122498	1.13688	0.000124146	1.15688	6.17676e-05	1.15688	0.000109115
1.09988	6.45142e-05	1.09988	0.000127716	1.12787	0.000121948	1.14688	0.000123596	1.16688	6.15234e-05	1.16688	0.000108722
1.10988	6.38123e-05	1.10988	0.000127502	1.13787	0.00012146	1.15688	0.000122925	1.17688	6.13098e-05	1.17688	0.000109061
1.11988	6.32019e-05	1.11988	0.000127289	1.14787	0.000120941	1.16688	0.000122375	1.18688	6.10962e-05	1.18688	0.000108668
1.12988	6.25305e-05	1.12988	0.000127106	1.15787	0.000120422	1.17688	0.000121765	1.19688	6.09131e-05	1.19688	0.000109006
1.13988	6.19202e-05	1.13988	0.000126923	1.16787	0.000119934	1.18688	0.000121216	1.20688	6.06995e-05	1.20688	0.000108624
1.14988	6.12793e-05	1.14988	0.00012674	1.17787	0.000119446	1.19688	0.000120605	1.21688	6.04858e-05	1.21688	0.000108952
1.15988	6.073e-05	1.15988	0.000126495	1.18787	0.000119019	1.20688	0.000120148	1.22688	6.03027e-05	1.22688	0.000108548
1.16988	6.00891e-05	1.16988	0.000126373	1.19787	0.00011853	1.21688	0.000119537	1.23688	6.01196e-05	1.23688	0.000108864
1.17988	5.95703e-05	1.17988	0.00012619	1.20787	0.000118073	1.22688	0.000119019	1.24688	5.99365e-05	1.24688	0.000108504
1.18988	5.896e-05	1.18988	0.000126007	1.21787	0.000117645	1.23688	0.0001185	1.25688	5.97534e-05	1.25688	0.000108832
1.19988	5.84412e-05	1.19988	0.000125793	1.22787	0.000117218	1.24688	0.000118011	1.26688	5.95703e-05	1.26688	0.000108449
1.20988	5.78613e-05	1.20988	0.000125671	1.23787	0.000116821	1.25688	0.000117493	1.27688	5.94177e-05	1.27688	0.000108777
1.21988	5.73425e-05	1.21988	0.000125458	1.24787	0.000116394	1.26688	0.000117035	1.28688	5.92041e-05	1.28688	0.000108417
1.22988	5.68237e-05	1.22988	0.000125305	1.25787	0.000115967	1.27688	0.000116486	1.29688	5.90515e-05	1.29688	0.000108711
1.23988	5.62744e-05	1.23988	0.000125153	1.26787	0.00011554	1.28688	0.000116089	1.30688	5.88684e-05	1.30688	0.00010834
1.24988	5.57861e-05	1.24988	0.000125031	1.27787	0.000115143	1.29688	0.000115601	1.31688	5.87158e-05	1.31688	0.000108635
1.25988	5.52979e-05	1.25988	0.000124847	1.28787	0.000114777	1.30688	0.000115173	1.32688	5.85327e-05	1.32688	0.000108275
1.26988	5.47791e-05	1.26988	0.000124725	1.29787	0.00011438	1.31688	0.000114685	1.33688	5.83801e-05	1.33688	0.000108559
1.27988	5.43213e-05	1.27988	0.000124512	1.30787	0.000113983	1.32688	0.000114288	1.34688	5.8197e-05	1.34688	0.000108209
1.28988	5.3833e-05	1.28988	0.00012442	1.31787	0.000113647	1.33688	0.000113831	1.35688	5.8075e-05	1.35688	0.000108504
1.29988	5.33752e-05	1.29988	0.000124268	1.32787	0.000113281	1.34688	0.000113464	1.36688	5.78918e-05	1.36688	0.000108165
1.30988	5.2887e-05	1.30988	0.000124115	1.33787	0.000112915	1.35688	0.000112946	1.37688	5.77698e-05	1.37688	0.00010846
1.31988	5.24902e-05	1.31988	0.000123932	1.34787	0.000112579	1.36688	0.00011261	1.38688	5.76172e-05	1.38688	0.000108122
1.32988	5.2002e-05	1.32988	0.00012384	1.35787	0.000112213	1.37688	0.000112152	1.39688	5.74646e-05	1.39688	0.000108395
1.33988	5.16052e-05	1.33988	0.000123657	1.36787	0.000111877	1.38688	0.000111816	1.40688	5.7312e-05	1.40688	0.000108067
1.34988	5.11475e-05	1.34988	0.000123566	1.37787	0.000111542	1.39688	0.000111359	1.41688	5.71899e-05	1.41688	0.000108329
1.35988	5.07507e-05	1.35988	0.000123413	1.38787	0.000111237	1.40688	0.000111053	1.42688	5.70374e-05	1.42688	0.000108002
1.36988	5.03235e-05	1.36988	0.000123322	1.39787	0.000110901	1.41688	0.000110657	1.43688	5.68848e-05	1.43688	0.000108264
1.37988	4.99573e-05	1.37988	0.000123138	1.40787	0.000110565	1.42688	0.000110291	1.44688	5.67627e-05	1.44688	0.000107947
1.38988	4.94995e-05	1.38988	0.000123077	1.41787	0.00011026	1.43688	0.000109894	1.45688	5.66406e-05	1.45688	0.000108198
1.39988	4.92249e-05	1.39988	0.000122894	1.42787	0.000109955	1.44688	0.000109558	1.46688	5.65186e-05	1.46688	0.000107903
1.40988	4.88129e-05	1.40988	0.000122772	1.43787	0.00010968	1.45688	0.000109192	1.47688	5.6366e-05	1.47688	0.000108144
1.41988	4.84772e-05	1.41988	0.00012265	1.44787	0.000109375	1.46688	0.000108887	1.48688	5.62439e-05	1.48688	0.000107849
1.42988	4.81476e-05	1.42988	0.000122528	1.45787	0.0001091	1.47688	0.00010849	1.49688	5.61218e-05	1.49688	0.000108078
1.43988	4.77936e-05	1.43988	0.000122406	1.46787	0.000108795	1.48688	0.000108215	1.50688	5.59998e-05	1.50688	0.000107783
1.44988	4.74091e-05	1.44988	0.000122345	1.47787	0.000108521	1.49688	0.000107819	1.51688	5.58777e-05	1.51688	0.000108013
1.45988	4.70459e-05	1.45988	0.000122162	1.48787	0.000108246	1.50688	0.000107544	1.52688	5.57556e-05	1.52688	0.00010774
1.46988	4.66888e-05	1.46988	0.000122101	1.49787	0.000107941	1.51688	0.000107178	1.53688	5.56335e-05	1.53688	0.000107958
1.47988	4.63684e-05	1.47988	0.000121948	1.50787	0.000107697	1.52688	0.000106873	1.54688	5.55115e-05	1.54688	0.000107696
1.48988	4.59869e-05	1.48988	0.000121857	1.51787	0.000107422	1.53688	0.000106506	1.55688	5.54199e-05	1.55688	0.000107903
1.49988	4.56787e-05	1.49988	0.000121704	1.52787	0.000107178	1.54688	0.000106262	1.56688	5.52979e-05	1.56688	0.000107641
1.50988	4.53461e-05	1.50988	0.000121674	1.53787	0.000106903	1.55688	0.000105927	1.57688	5.52063e-05	1.57688	0.000107827
1.51988	4.50409e-05	1.51988	0.000121521	1.54787	0.000106628	1.56688	0.000105682	1.58688	5.50842e-05	1.58688	0.000107576
1.52988	4.46716e-05	1.52988	0.00012146	1.55787	0.000106384	1.57688	0.000105316	1.59688	5.49622e-05	1.59688	0.000107761
1.53988	4.43939e-05	1.53988	0.000121307	1.56787	0.00010614	1.58688	0.000105042	1.60688	5.48401e-05	1.60688	0.000107521
1.54988	4.40674e-05	1.54988	0.000121246	1.57787	0.000105896	1.59688	0.000104736	1.61688	5.47485e-05	1.61688	0.000107685
1.55988	4.37347e-05	1.55988	0.000121063	1.58787	0.000105652	1.60688	0.000104492	1.62688	5.4657e-05	1.62688	0.000107467
1.56988	4.34631e-05	1.56988	0.000121063	1.59787	0.000105408	1.61688	0.000104126	1.63688	5.45349e-05	1.63688	0.00010763
1.57988	4.31641e-05	1.57988	0.000120911	1.60787	0.000105133	1.62688	0.000103943	1.64688	5.44128e-05	1.64688	0.000107412
1.58988	4.28589e-05	1.58988	0.00012085	1.61787	0.000104889	1.63688	0.000103607	1.65688	5.43518e-05	1.65688	0.000107576
1.59988	4.25659e-05	1.59988	0.000120697	1.62787	0.000104675	1.64688	0.000103363	1.66688	5.42297e-05	1.66688	0.000107379
1.60988	4.22455e-05	1.60988	0.000120636	1.63787	0.000104431	1.65688	0.000103088	1.67688	5.41382e-05	1.67688	0.000107521
1.61988	4.198e-05	1.61988	0.000120514	1.64787	0.000104248	1.66688	0.000102814	1.68688	5.40466e-05	1.68688	0.000107325
1.62988	4.16992e-05	1.62988	0.000120483	1.65787	0.000103973	1.67688	0.000102539	1.69688	5.39551e-05	1.69688	0.000107456
1.63988	4.14551e-05	1.63988	0.0001203	1.66787	0.00010379	1.68688	0.000102325	1.70688	5.38635e-05	1.70688	0.00010727
1.64988	4.1156e-05	1.64988	0.00012027	1.67787	0.000103546	1.69688	0.00010202	1.71688	5.3772e-05	1.71688	0.00010739
1.65988	4.09027e-05	1.65988	0.000120148	1.68787	0.000103333	1.70688	0.000101807	1.72688	5.36499e-05	1.72688	0.000107216
1.66988	4.06128e-05	1.66988	0.000120087	1.69787	0.000103119	1.71688	0.000101532	1.73688	5.35583e-05	1.73688	0.000107314
1.67988	4.03778e-05	1.67988	0.000119965	1.70787	0.000102936	1.72688	0.000101318	1.74688	5.34668e-05	1.74688	0.000107161
1.68988	4.01001e-05	1.68988	0.000119965	1.71787	0.000102692	1.73688	0.000101013	1.75688	5.34058e-05	1.75688	0.000107248
1.69988	3.9856e-05	1.69988	0.000119781	1.72787	0.000102509	1.74688	0.0001008	1.76688	5.32837e-05	1.76688	0.000107095
1.70988	3.95844e-05	1.70988	0.000119751	1.73787	0.000102264	1.75688	0.000100525	1.77688	5.31921e-05	1.77688	0.000111518
1.71988	3.93738e-05	1.71988	0.000119659	1.74787	0.000102081	1.76688	0.000100342	1.78688	5.31006e-05	1.78688	0.000119521
1.72988	3.909e-05	1.72988	0.000119568	1.75787	0.000101898	1.77688	0.000100067	1.79688	5.30396e-05	1.79688	0.000129327
1.73988	3.88702e-05	1.73988	0.000119507	1.76787	0.000101715	1.78688	9.98535e-05	1.80688	5.29175e-05	1.80688	0.000140202
1.74988	3.86047e-05	1.74988	0.000119446	1.77787	0.000101471	1.79688	9.95789e-05	1.81688	5.28564e-05	1.81688	0.000151941
1.75988	3.83942e-05	1.75988	0.000119324	1.78787	0.000101318	1.80688	9.93958e-05	1.82688	5.27649e-05	1.82688	0.000159529
1.76988	3.81317e-05	1.76988	0.000119263	1.79787	0.000101105	1.81688	9.91211e-05	1.83688	5.26733e-05	1.83688	0.000162707
1.77988	3.79517e-05	1.77988	0.000119141	1.80787	0.000100922	1.82688	9.89685e-05	1.84688	5.25818e-05	1.84688	0.000164126
1.78988	3.76587e-05	1.78988	0.000119141	1.81787	0.000100739	1.83688	9.86938e-05	1.85688	5.25208e-05	1.85688	0.000164236
1.79988	3.74939e-05	1.79988	0.000118958	1.82787	0.000100555	1.84688	9.85413e-05	1.86688	5.24292e-05	1.86688	0.000163657
1.80988	3.72345e-05	1.80988	0.000118988	1.83787	0.000100372	1.85688	9.82666e-05	1.87688	5.23376e-05	1.87688	0.000163045
1.81988	3.70239e-05	1.81988	0.000118866	1.84787	0.000100189	1.86688	9.80835e-05	1.88688	5.22766e-05	1.88688	0.000163591
1.82988	3.67859e-05	1.82988	0.000118835	1.85787	0.000100006	1.87688	9.78394e-05	1.89688	5.22156e-05	1.89688	0.00016488
1.83988	3.66425e-05	1.83988	0.000118683	1.86787	9.98535e-05	1.88688	9.76868e-05	1.90688	5.20935e-05	1.90688	0.000166179
1.84988	3.63708e-05	1.84988	0.000118652	1.87787	9.96094e-05	1.89688	9.74426e-05	1.91688	5.20325e-05	1.91688	0.000166976
1.85988	3.61908e-05	1.85988	0.000118561	1.88787	9.95178e-05	1.90688	9.729e-05	1.92688	5.19714e-05	1.92688	0.000167304
1.86988	3.59528e-05	1.86988	0.00011853	1.89787	9.93042e-05	1.91688	9.70459e-05	1.93688	5.18799e-05	1.93688	0.000167216
1.87988	3.57971e-05	1.87988	0.000118408	1.90787	9.91516e-05	1.92688	9.68933e-05	1.94688	5.18188e-05	1.94688	0.000166332
1.88988	3.55347e-05	1.88988	0.000118408	1.91787	9.89685e-05	1.93688	9.66492e-05	1.95688	5.17273e-05	1.95688	0.000165611
1.89988	3.53821e-05	1.89988	0.000118256	1.92787	9.88159e-05	1.94688	9.64966e-05	1.96688	5.16357e-05	1.96688	0.000165229
1.90988	3.5144e-05	1.90988	0.000118256	1.93787	9.86328e-05	1.95688	9.62524e-05	1.97688	5.16052e-05	1.97688	0.000164989
1.91988	3.50098e-05	1.91988	0.000118134	1.94787	9.85107e-05	1.96688	9.60999e-05	1.98688	5.15137e-05	1.98688	0.000164629
1.92988	3.47565e-05	1.92988	0.000118134	1.95787	9.83276e-05	1.97688	9.58862e-05	1.99688	5.14526e-05	1.99688	0.000164312
1.93988	3.46252e-05	1.93988	0.000118011	1.96787	9.8175e-05	1.98688	9.57031e-05	2.00688	5.13611e-05	2.00688	0.000163886
1.94988	3.43933e-05	1.94988	0.000117981	1.97787	9.79919e-05	1.99688	9.552e-05	2.01688	5.13306e-05	2.01688	0.000163515
1.95988	3.42621e-05	1.95988	0.000117859	1.98787	9.78394e-05	2.00688	9.53369e-05	2.02688	5.12085e-05	2.02688	0.000163165
1.96988	3.40179e-05	1.96988	0.000117859	1.99787	9.76868e-05	2.01688	9.51233e-05	2.03688	5.1178e-05	2.03688	0.000162816
1.97988	3.38867e-05	1.97988	0.000117737	2.00787	9.75342e-05	2.02688	9.49707e-05	2.04688	5.10864e-05	2.04688	0.000162521
1.98988	3.36609e-05	1.98988	0.000117737	2.01787	9.73511e-05	2.03688	9.47876e-05	2.05688	5.10559e-05	2.05688	0.000162215
1.99988	3.35327e-05	1.99988	0.000117645	2.02787	9.7229e-05	2.04688	9.4635e-05	2.06688	5.09338e-05	2.06688	0.000161844
2.00988	3.3316e-05	2.00988	0.000117584	2.03787	9.70459e-05	2.05688	9.44214e-05	2.07688	5.09033e-05	2.07688	0.00016144
2.01988	3.31726e-05	2.01988	0.000117523	2.04787	9.69543e-05	2.06688	9.42993e-05	2.08688	5.08118e-05	2.08688	0.000161091
2.02988	3.2962e-05	2.02988	0.000117462	2.05787	9.67712e-05	2.07688	9.40857e-05	2.09688	5.07813e-05	2.09688	0.00016061
2.03988	3.28247e-05	2.03988	0.000117401	2.06787	9.66492e-05	2.08688	9.39636e-05	2.10688	5.06897e-05	2.10688	0.000160174
2.04988	3.26385e-05	2.04988	0.000117371	2.07787	9.64966e-05	2.09688	9.375e-05	2.11688	5.06592e-05	2.11688	0.000159813
2.05988	3.25134e-05	2.05988	0.000117249	2.08787	9.6344e-05	2.10688	9.36279e-05	2.12688	5.05981e-05	2.12688	0.000159486
2.06988	3.23242e-05	2.06988	0.000117279	2.09787	9.61914e-05	2.11688	9.34448e-05	2.13688	5.05371e-05	2.13688	0.000159136
2.07988	3.21686e-05	2.07988	0.000117096	2.10787	9.60693e-05	2.12688	9.32922e-05	2.14688	5.04761e-05	2.14688	0.000158994
2.08988	3.19946e-05	2.08988	0.000117126	2.11787	9.59167e-05	2.13688	9.31091e-05	2.15688	5.04456e-05	2.15688	0.000158798
2.09988	3.18542e-05	2.09988	0.000117004	2.12787	9.57947e-05	2.14688	9.30176e-05	2.16688	5.0354e-05	2.16688	0.000158645
2.10988	3.16681e-05	2.10988	0.000117035	2.13787	9.56421e-05	2.15688	9.2804e-05	2.17688	5.0293e-05	2.17688	0.000158492
2.11988	3.15308e-05	2.11988	0.000116882	2.14787	9.55505e-05	2.16688	9.26819e-05	2.18688	5.02319e-05	2.18688	0.000158383
2.12988	3.13599e-05	2.12988	0.000116913	2.15787	9.53674e-05	2.17688	9.24683e-05	2.19688	5.01709e-05	2.19688	0.000158132
2.13988	3.12347e-05	2.13988	0.000116791	2.16787	9.52454e-05	2.18688	9.23767e-05	2.20688	5.01099e-05	2.20688	0.000157236
2.14988	3.10455e-05	2.14988	0.00011676	2.17787	9.50928e-05	2.19688	9.21631e-05	2.21688	5.00793e-05	2.21688	0.000155773
2.15988	3.09357e-05	2.15988	0.000116669	2.18787	9.50012e-05	2.20688	9.2041e-05	2.22688	5.00183e-05	2.22688	0.000153786
2.16988	3.07617e-05	2.16988	0.000116699	2.19787	9.48181e-05	2.21688	9.18579e-05	2.23688	4.99573e-05	2.23688	0.000151187
2.17988	3.06183e-05	2.17988	0.000116547	2.20787	9.47266e-05	2.22688	9.17664e-05	2.24688	4.98962e-05	2.24688	0.000148599
2.18988	3.04718e-05	2.18988	0.000116577	2.21787	9.4574e-05	2.23688	9.15833e-05	2.25688	4.98352e-05	2.25688	0.000146536
2.19988	3.03375e-05	2.19988	0.000116486	2.22787	9.44824e-05	2.24688	9.14612e-05	2.26688	4.97742e-05	2.26688	0.000144778
2.20988	3.01575e-05	2.20988	0.000116425	2.23787	9.43298e-05	2.25688	9.12781e-05	2.27688	4.97437e-05	2.27688	0.000143325
2.21988	3.00354e-05	2.21988	0.000116364	2.24787	9.42383e-05	2.26688	9.1156e-05	2.28688	4.98108e-05	2.28688	0.000142386
2.22988	2.99103e-05	2.22988	0.000116364	2.25787	9.40552e-05	2.27688	9.09729e-05	2.29688	4.97925e-05	2.29688	0.000141207
2.23988	2.97913e-05	2.23988	0.000116272	2.26787	9.39941e-05	2.28688	9.08508e-05	2.30688	4.97131e-05	2.30688	0.000140082
2.24988	2.96112e-05	2.24988	0.000116272	2.27787	9.38416e-05	2.29688	9.06982e-05	2.31688	4.96552e-05	2.31688	0.000138947
2.25988	2.94983e-05	2.25988	0.00011615	2.28787	9.375e-05	2.30688	9.05762e-05	2.32688	4.95972e-05	2.32688	0.00013804
2.26988	2.93732e-05	2.26988	0.000116119	2.29787	9.36279e-05	2.31688	9.03931e-05	2.33688	4.9585e-05	2.33688	0.000137014
2.27988	2.92267e-05	2.27988	0.000116058	2.30787	9.35364e-05	2.32688	9.0332e-05	2.34688	4.95056e-05	2.34688	0.000136271
2.28988	2.90955e-05	2.28988	0.000116089	2.31787	9.33838e-05	2.33688	9.01489e-05	2.35688	4.9469e-05	2.35688	0.000135496
2.29988	2.89917e-05	2.29988	0.000115967	2.32787	9.33228e-05	2.34688	9.00269e-05	2.36688	4.94049e-05	2.36688	0.000134983
2.30988	2.88239e-05	2.30988	0.000115997	2.33787	9.31396e-05	2.35688	8.98743e-05	2.37688	4.93805e-05	2.37688	0.000134339
2.31988	2.87231e-05	2.31988	0.000115845	2.34787	9.30786e-05	2.36688	8.97827e-05	2.38688	4.93042e-05	2.38688	0.000133957
2.32988	2.85828e-05	2.32988	0.000115845	2.35787	9.28955e-05	2.37688	8.95996e-05	2.39688	4.92706e-05	2.39688	0.000133422
2.33988	2.84607e-05	2.33988	0.000115753	2.36787	9.28345e-05	2.38688	8.95386e-05	2.40688	4.92157e-05	2.40688	0.000133149
2.34988	2.83356e-05	2.34988	0.000115784	2.37787	9.26819e-05	2.39688	8.93555e-05	2.41688	4.91882e-05	2.41688	0.000132679
2.35988	2.82196e-05	2.35988	0.000115692	2.38787	9.26208e-05	2.40688	8.92639e-05	2.42688	4.90936e-05	2.42688	0.000132461
2.36988	2.80975e-05	2.36988	0.000115692	2.39787	9.24683e-05	2.41688	8.90808e-05	2.43688	4.91028e-05	2.43688	0.000132035
2.37988	2.79785e-05	2.37988	0.00011557	2.40787	9.24072e-05	2.42688	8.90198e-05	2.44688	4.90173e-05	2.44688	0.000131893
2.38988	2.78595e-05	2.38988	0.000115631	2.41787	9.22241e-05	2.43688	8.88367e-05	2.45688	4.89746e-05	2.45688	0.0001315
2.39988	2.77466e-05	2.39988	0.000115479	2.42787	9.21631e-05	2.44688	8.87146e-05	2.46688	4.89197e-05	2.46688	0.000131412
2.40988	2.76306e-05	2.40988	0.000115509	2.43787	9.2041e-05	2.45688	8.85925e-05	2.47688	4.88708e-05	2.47688	0.000131085
2.41988	2.75208e-05	2.41988	0.000115387	2.44787	9.198e-05	2.46688	8.84705e-05	2.48688	4.88251e-05	2.48688	0.000131052
2.42988	2.73773e-05	2.42988	0.000115417	2.45787	9.17969e-05	2.47688	8.83484e-05	2.49688	4.87854e-05	2.49688	0.000130735
2.43988	2.72827e-05	2.43988	0.000115326	2.46787	9.17358e-05	2.48688	8.82568e-05	2.50688	4.87213e-05	2.50688	0.000130735
2.44988	2.71545e-05	2.44988	0.000115326	2.47787	9.15833e-05	2.49688	8.80737e-05	2.51688	4.86908e-05	2.51688	0.000130441
2.45988	2.7063e-05	2.45988	0.000115265	2.48787	9.15222e-05	2.50688	8.80127e-05	2.52688	4.86328e-05	2.52688	0.000130462
2.46988	2.6947e-05	2.46988	0.000115234	2.49787	9.14001e-05	2.51688	8.78601e-05	2.53688	4.85962e-05	2.53688	0.000130179
2.47988	2.68463e-05	2.47988	0.000115143	2.50787	9.13391e-05	2.52688	8.77686e-05	2.54688	4.85352e-05	2.54688	0.000130233
2.48988	2.67395e-05	2.48988	0.000115143	2.51787	9.11865e-05	2.53688	8.76465e-05	2.55688	4.85229e-05	2.55688	0.000129938
2.49988	2.66022e-05	2.49988	0.000115082	2.52787	9.11255e-05	2.54688	8.75244e-05	2.56688	4.84436e-05	2.56688	0.000130004
2.50988	2.64923e-05	2.50988	0.000115051	2.53787	9.10034e-05	2.55688	8.74023e-05	2.57688	4.84131e-05	2.57688	0.000129709
2.51988	2.64252e-05	2.51988	0.000115021	2.54787	9.09119e-05	2.56688	8.73108e-05	2.58688	4.83368e-05	2.58688	0.000129775
2.52988	2.62939e-05	2.52988	0.00011496	2.55787	9.07898e-05	2.57688	8.71582e-05	2.59688	4.83307e-05	2.59688	0.00012948
2.53988	2.62024e-05	2.53988	0.000114899	2.56787	9.07288e-05	2.58688	8.70667e-05	2.60688	4.82605e-05	2.60688	0.000129578
2.54988	2.60803e-05	2.54988	0.000114899	2.57787	9.06067e-05	2.59688	8.69446e-05	2.61688	4.82361e-05	2.61688	0.000129283
2.55988	2.59949e-05	2.55988	0.000114838	2.58787	9.05457e-05	2.60688	8.68225e-05	2.62688	4.81689e-05	2.62688	0.000129392
2.56988	2.59094e-05	2.56988	0.000114777	2.59787	9.04236e-05	2.61688	8.6731e-05	2.63688	4.81628e-05	2.63688	0.000129119
2.57988	2.57935e-05	2.57988	0.000114777	2.60787	9.0332e-05	2.62688	8.66089e-05	2.64688	4.80865e-05	2.64688	0.000129272
2.58988	2.57141e-05	2.58988	0.000114685	2.61787	9.021e-05	2.63688	8.64868e-05	2.65688	4.80804e-05	2.65688	0.000128999
2.59988	2.56012e-05	2.59988	0.000114685	2.62787	9.01489e-05	2.64688	8.64258e-05	2.66688	4.80011e-05	2.66688	0.000129185
2.60988	2.54852e-05	2.60988	0.000114655	2.63787	9.00269e-05	2.65688	8.62732e-05	2.67688	4.7998e-05	2.67688	0.000128923
2.61988	2.54303e-05	2.61988	0.000114563	2.64787	8.99658e-05	2.66688	8.62122e-05	2.68688	4.79248e-05	2.68688	0.000129108
2.62988	2.53021e-05	2.62988	0.000114594	2.65787	8.98438e-05	2.67688	8.60596e-05	2.69688	4.79004e-05	2.69688	0.000128846
2.63988	2.52289e-05	2.63988	0.000114471	2.66787	8.97827e-05	2.68688	8.59985e-05	2.70688	4.78516e-05	2.70688	0.000129065
2.64988	2.5119e-05	2.64988	0.000114502	2.67787	8.96301e-05	2.69688	8.58459e-05	2.71688	4.78149e-05	2.71688	0.000128781
2.65988	2.50458e-05	2.65988	0.000114441	2.68787	8.95996e-05	2.70688	8.57239e-05	2.72688	4.7757e-05	2.72688	0.00012901
2.66988	2.49146e-05	2.66988	0.00011438	2.69787	8.9447e-05	2.71688	8.56323e-05	2.73688	4.77448e-05	2.73688	0.000128737
2.67988	2.48657e-05	2.67988	0.000114349	2.70787	8.9386e-05	2.72688	8.55713e-05	2.74688	4.7702e-05	2.74688	0.000128967
2.68988	2.47742e-05	2.68988	0.00011438	2.71787	8.92639e-05	2.73688	8.54187e-05	2.75688	4.76715e-05	2.75688	0.000128683
2.69988	2.46582e-05	2.69988	0.000114288	2.72787	8.92029e-05	2.74688	8.53577e-05	2.76688	4.76166e-05	2.76688	0.000128923
2.70988	2.45605e-05	2.70988	0.000114258	2.73787	8.90808e-05	2.75688	8.52356e-05	2.77688	4.75922e-05	2.77688	0.000128606
2.71988	2.45056e-05	2.71988	0.000114197	2.74787	8.90503e-05	2.76688	8.5144e-05	2.78688	4.75281e-05	2.78688	0.000128836
2.72988	2.43683e-05	2.72988	0.000114227	2.75787	8.89587e-05	2.77688	8.50525e-05	2.79688	4.74884e-05	2.79688	0.000128508
2.73988	2.43256e-05	2.73988	0.000114105	2.76787	8.88977e-05	2.78688	8.49609e-05	2.80688	4.74365e-05	2.80688	0.000128748
2.74988	2.42126e-05	2.74988	0.000114136	2.77787	8.87451e-05	2.79688	8.48083e-05	2.81688	4.74152e-05	2.81688	0.00012841
2.75988	2.41577e-05	2.75988	0.000114044	2.78787	8.86841e-05	2.80688	8.47778e-05	2.82688	4.73694e-05	2.82688	0.000128683
2.76988	2.40326e-05	2.76988	0.000114075	2.79787	8.85925e-05	2.81688	8.46252e-05	2.83688	4.73389e-05	2.83688	0.000128355
2.77988	2.39838e-05	2.77988	0.000113983	2.80787	8.85315e-05	2.82688	8.45642e-05	2.84688	4.72748e-05	2.84688	0.000128639
2.78988	2.38525e-05	2.78988	0.000113983	2.81787	8.84094e-05	2.83688	8.44421e-05	2.85688	4.72656e-05	2.85688	0.000128311
2.79988	2.38251e-05	2.79988	0.000113892	2.82787	8.83789e-05	2.84688	8.43506e-05	2.86688	4.72198e-05	2.86688	0.000128639
2.80988	2.3703e-05	2.80988	0.000113922	2.83787	8.82568e-05	2.85688	8.4259e-05	2.87688	4.7171e-05	2.87688	0.0001283
2.81988	2.36542e-05	2.81988	0.000113861	2.84787	8.81958e-05	2.86688	8.41675e-05	2.88688	4.71161e-05	2.88688	0.000128617
2.82988	2.35138e-05	2.82988	0.000113861	2.85787	8.80737e-05	2.87688	8.41064e-05	2.89688	4.71161e-05	2.89688	0.000128257
2.83988	2.34741e-05	2.83988	0.00011377	2.86787	8.80432e-05	2.88688	8.39844e-05	2.90688	4.70612e-05	2.90688	0.000128595
2.84988	2.33826e-05	2.84988	0.000113831	2.87787	8.79211e-05	2.89688	8.38928e-05	2.91688	4.70337e-05	2.91688	0.000128224
2.85988	2.33154e-05	2.85988	0.000113708	2.88787	8.78601e-05	2.90688	8.38013e-05	2.92688	4.6991e-05	2.92688	0.000128552
2.86988	2.32208e-05	2.86988	0.00011377	2.89787	8.77686e-05	2.91688	8.37097e-05	2.93688	4.69666e-05	2.93688	0.00012818
2.87988	2.3172e-05	2.87988	0.000113647	2.90787	8.77075e-05	2.92688	8.36487e-05	2.94688	4.69116e-05	2.94688	0.00012853
2.88988	2.30774e-05	2.88988	0.000113678	2.91787	8.75854e-05	2.93688	8.35266e-05	2.95688	4.69025e-05	2.95688	0.000128126
2.89988	2.30103e-05	2.89988	0.000113586	2.92787	8.75549e-05	2.94688	8.34656e-05	2.96688	4.68445e-05	2.96688	0.000128464
2.90988	2.29309e-05	2.90988	0.000113617	2.93787	8.74329e-05	2.95688	8.3374e-05	2.97688	4.68567e-05	2.97688	0.00012806
2.91988	2.28577e-05	2.91988	0.000113525	2.94787	8.74023e-05	2.96688	8.32825e-05	2.98688	4.67804e-05	2.98688	0.000128399
2.92988	2.27631e-05	2.92988	0.000113525	2.95787	8.73108e-05	2.97688	8.31909e-05	2.99688	4.67773e-05	2.99688	0.000127973
2.93988	2.27173e-05	2.93988	0.000113464	2.96787	8.72498e-05	2.98688	8.30994e-05	3.00688	4.67133e-05	3.00688	0.000128344
2.94988	2.26379e-05	2.94988	0.000113464	2.97787	8.71277e-05	2.99688	8.30078e-05	3.01688	4.66919e-05	3.01688	0.000127929
2.95988	2.25281e-05	2.95988	0.000113403	2.98787	8.70972e-05	3.00688	8.29468e-05	3.02688	4.66431e-05	3.02688	0.000128311
2.96988	2.24731e-05	2.96988	0.000113403	2.99787	8.70056e-05	3.01688	8.28552e-05	3.03688	4.66156e-05	3.03688	0.000127907
2.97988	2.23785e-05	2.97988	0.000113312	3.00787	8.69446e-05	3.02688	8.27637e-05	3.04688	4.65729e-05	3.04688	0.00012829
2.98988	2.23358e-05	2.98988	0.000113342	3.01787	8.68225e-05	3.03688	8.26721e-05	3.05688	4.65424e-05	3.05688	0.000127853
2.99988	2.22504e-05	2.99988	0.000113251	3.02787	8.6792e-05	3.04688	8.25806e-05	3.06688	4.64996e-05	3.06688	0.000128257
3.00988	2.21832e-05	3.00988	0.000113281	3.03787	8.67004e-05	3.05688	8.25195e-05	3.07688	4.64752e-05	3.07688	0.000127831
3.01988	2.2113e-05	3.01988	0.00011319	3.04787	8.66089e-05	3.06688	8.2428e-05	3.08688	4.64417e-05	3.08688	0.000128235
3.02988	2.20551e-05	3.02988	0.00011322	3.05787	8.65173e-05	3.07688	8.23364e-05	3.09688	4.6405e-05	3.09688	0.00012782
3.03988	2.19788e-05	3.03988	0.000113129	3.06787	8.65173e-05	3.08688	8.22449e-05	3.10688	4.63623e-05	3.10688	0.000128224
3.04988	2.19086e-05	3.04988	0.000113129	3.07787	8.63953e-05	3.09688	8.21838e-05	3.11688	4.6344e-05	3.11688	0.000127776
3.05988	2.18414e-05	3.05988	0.000113098	3.08787	8.63342e-05	3.10688	8.21228e-05	3.12688	4.62982e-05	3.12688	0.00012818
3.06988	2.17834e-05	3.06988	0.000113098	3.09787	8.62427e-05	3.11688	8.20313e-05	3.13688	4.62738e-05	3.13688	0.000127744
3.07988	2.16888e-05	3.07988	0.000113037	3.10787	8.61816e-05	3.12688	8.19397e-05	3.14688	4.62555e-05	3.14688	0.000128148
3.08988	2.16522e-05	3.08988	0.000113037	3.11787	8.60901e-05	3.13688	8.18481e-05	3.15688	4.6225e-05	3.15688	0.000127689
3.09988	2.15485e-05	3.09988	0.000112976	3.12787	8.60596e-05	3.14688	8.17871e-05	3.16688	4.61761e-05	3.16688	0.000128093
3.10988	2.1524e-05	3.10988	0.000112976	3.13787	8.5968e-05	3.15688	8.16956e-05	3.17688	4.61487e-05	3.17688	0.000127634
3.11988	2.14417e-05	3.11988	0.000112946	3.14787	8.59375e-05	3.16688	8.1604e-05	3.18688	4.61151e-05	3.18688	0.000128038
3.12988	2.13776e-05	3.12988	0.000112885	3.15787	8.58154e-05	3.17688	8.1543e-05	3.19688	4.60815e-05	3.19688	0.00012758
3.13988	2.13135e-05	3.13988	0.000112854	3.16787	8.57849e-05	3.18688	8.14819e-05	3.20688	4.60602e-05	3.20688	0.000128006
3.14988	2.12738e-05	3.14988	0.000112854	3.17787	8.56934e-05	3.19688	8.13904e-05	3.21688	4.60144e-05	3.21688	0.000127547
3.15988	2.11761e-05	3.15988	0.000112854	3.18787	8.56323e-05	3.20688	8.13293e-05	3.22688	4.599e-05	3.22688	0.000127973
3.16988	2.10999e-05	3.16988	0.000112762	3.19787	8.55713e-05	3.21688	8.12378e-05	3.23688	4.59564e-05	3.23688	0.000127503
3.17988	2.10419e-05	3.17988	0.000112762	3.20787	8.54797e-05	3.22688	8.11462e-05	3.24688	4.59351e-05	3.24688	0.00012794
3.18988	2.10052e-05	3.18988	0.000112732	3.21787	8.54187e-05	3.23688	8.10852e-05	3.25688	4.58984e-05	3.25688	0.000127492
3.19988	2.09229e-05	3.19988	0.000112732	3.22787	8.53882e-05	3.24688	8.09937e-05	3.26688	4.58679e-05	3.26688	0.000127951
3.20988	2.09015e-05	3.20988	0.000112671	3.23787	8.52966e-05	3.25688	8.09631e-05	3.27688	4.58435e-05	3.27688	0.000127492
3.21988	2.0816e-05	3.21988	0.000112671	3.24787	8.52051e-05	3.26688	8.08716e-05	3.28688	4.5813e-05	3.28688	0.00012794
3.22988	2.07611e-05	3.22988	0.00011261	3.25787	8.51746e-05	3.27688	8.08105e-05	3.29688	4.57855e-05	3.29688	0.000127471
3.23988	2.06787e-05	3.23988	0.00011261	3.26787	8.5083e-05	3.28688	8.0719e-05	3.30688	4.57489e-05	3.30688	0.000127896
3.24988	2.0639e-05	3.24988	0.000112579	3.27787	8.50525e-05	3.29688	8.06274e-05	3.31688	4.57336e-05	3.31688	0.000127416
3.25988	2.05719e-05	3.25988	0.000112549	3.28787	8.49609e-05	3.30688	8.05664e-05	3.32688	4.5697e-05	3.32688	0.000127864
3.26988	2.05383e-05	3.26988	0.000112518	3.29787	8.48999e-05	3.31688	8.05054e-05	3.33688	4.56726e-05	3.33688	0.000127372
3.27988	2.04376e-05	3.27988	0.000112488	3.30787	8.48083e-05	3.32688	8.04443e-05	3.34688	4.5639e-05	3.34688	0.000127809
3.28988	2.03766e-05	3.28988	0.000112427	3.31787	8.47778e-05	3.33688	8.03528e-05	3.35688	4.56238e-05	3.35688	0.000127329
3.29988	2.03278e-05	3.29988	0.000112457	3.32787	8.46863e-05	3.34688	8.02612e-05	3.36688	4.5578e-05	3.36688	0.000127765
3.30988	2.02881e-05	3.30988	0.000112427	3.33787	8.46252e-05	3.35688	8.02307e-05	3.37688	4.55688e-05	3.37688	0.000127274
3.31988	2.02209e-05	3.31988	0.000112366	3.34787	8.45947e-05	3.36688	8.01697e-05	3.38688	4.55109e-05	3.38688	0.000127733
3.32988	2.01782e-05	3.32988	0.000112366	3.35787	8.45032e-05	3.37688	8.00781e-05	3.39688	4.55078e-05	3.39688	0.000127252
3.33988	2.01141e-05	3.33988	0.000112335	3.36787	8.44421e-05	3.38688	8.00171e-05	3.40688	4.5459e-05	3.40688	0.000127711
3.34988	2.00562e-05	3.34988	0.000112335	3.37787	8.43811e-05	3.39688	7.99561e-05	3.41688	4.54498e-05	3.41688	0.000127219
3.35988	1.99982e-05	3.35988	0.000112274	3.38787	8.43201e-05	3.40688	7.98645e-05	3.42688	4.54071e-05	3.42688	0.000127678
3.36988	1.99524e-05	3.36988	0.000112274	3.39787	8.42896e-05	3.41688	7.9834e-05	3.43688	4.53949e-05	3.43688	0.000127187
3.37988	1.98883e-05	3.37988	0.000112244	3.40787	8.42285e-05	3.42688	7.97424e-05	3.44688	4.53461e-05	3.44688	0.000127656
3.38988	1.98486e-05	3.38988	0.000112213	3.41787	8.4137e-05	3.43688	7.96509e-05	3.45688	4.53522e-05	3.45688	0.000127176
3.39988	1.97784e-05	3.39988	0.000112213	3.42787	8.40759e-05	3.44688	7.96204e-05	3.46688	4.52972e-05	3.46688	0.000127645
3.40988	1.97357e-05	3.40988	0.000112183	3.43787	8.40454e-05	3.45688	7.95288e-05	3.47688	4.53003e-05	3.47688	0.000127154
3.41988	1.96747e-05	3.41988	0.000112122	3.44787	8.39844e-05	3.46688	7.94678e-05	3.48688	4.52362e-05	3.48688	0.000127634
3.42988	1.96442e-05	3.42988	0.000112122	3.45787	8.39233e-05	3.47688	7.94067e-05	3.49688	4.52271e-05	3.49688	0.000127121
3.43988	1.95618e-05	3.43988	0.000112091	3.46787	8.38623e-05	3.48688	7.93457e-05	3.50688	4.51813e-05	3.50688	0.000127591
3.44988	1.95374e-05	3.44988	0.000112091	3.47787	8.38013e-05	3.49688	7.92847e-05	3.51688	4.51691e-05	3.51688	0.000127088
3.45988	1.94702e-05	3.45988	0.00011203	3.48787	8.37402e-05	3.50688	7.92236e-05	3.52688	4.51538e-05	3.52688	0.000127558
3.46988	1.94366e-05	3.46988	0.000112061	3.49787	8.36792e-05	3.51688	7.91321e-05	3.53688	4.51202e-05	3.53688	0.000127034
3.47988	1.93695e-05	3.47988	0.000111969	3.50787	8.36182e-05	3.52688	7.91016e-05	3.54688	4.50928e-05	3.54688	0.000127525
3.48988	1.93207e-05	3.48988	0.000112	3.51787	8.35571e-05	3.53688	7.89795e-05	3.55688	4.50806e-05	3.55688	0.00012699
3.49988	1.92474e-05	3.49988	0.000111969	3.52787	8.34961e-05	3.54688	7.89795e-05	3.56688	4.50531e-05	3.56688	0.000127471
3.50988	1.92169e-05	3.50988	0.000111938	3.53787	8.34351e-05	3.55688	7.88879e-05	3.57688	4.50378e-05	3.57688	0.000126946
3.51988	1.91742e-05	3.51988	0.000111877	3.54787	8.3374e-05	3.56688	7.88269e-05	3.58688	4.50134e-05	3.58688	0.000127449
3.52988	1.91162e-05	3.52988	0.000111908	3.55787	8.3313e-05	3.57688	7.87354e-05	3.59688	4.49738e-05	3.59688	0.000126914
3.53988	1.90918e-05	3.53988	0.000111847	3.56787	8.32825e-05	3.58688	7.86743e-05	3.60688	4.49493e-05	3.60688	0.000127427
3.54988	1.90216e-05	3.54988	0.000111847	3.57787	8.32214e-05	3.59688	7.86133e-05	3.61688	4.49249e-05	3.61688	0.000126892
3.55988	1.89545e-05	3.55988	0.000111816	3.58787	8.31604e-05	3.60688	7.86133e-05	3.62688	4.48883e-05	3.62688	0.000127394
3.56988	1.89484e-05	3.56988	0.000111786	3.59787	8.30994e-05	3.61688	7.85217e-05	3.63688	4.48761e-05	3.63688	0.000126848
3.57988	1.88477e-05	3.57988	0.000111786	3.60787	8.30383e-05	3.62688	7.84607e-05	3.64688	4.48425e-05	3.64688	0.000127361
3.58988	1.88385e-05	3.58988	0.000111725	3.61787	8.29773e-05	3.63688	7.83691e-05	3.65688	4.48212e-05	3.65688	0.000126815
3.59988	1.87683e-05	3.59988	0.000111725	3.62787	8.29468e-05	3.64688	7.83386e-05	3.66688	4.48059e-05	3.66688	0.00012734
3.60988	1.87531e-05	3.60988	0.000111694	3.63787	8.28857e-05	3.65688	7.82776e-05	3.67688	4.47662e-05	3.67688	0.000126794
3.61988	1.86676e-05	3.61988	0.000111694	3.64787	8.28247e-05	3.66688	7.82166e-05	3.68688	4.4751e-05	3.68688	0.000127329
3.62988	1.86462e-05	3.62988	0.000111664	3.65787	8.27637e-05	3.67688	7.8186e-05	3.69688	4.47174e-05	3.69688	0.000126783
3.63988	1.85822e-05	3.63988	0.000111664	3.66787	8.27026e-05	3.68688	7.80945e-05	3.70688	4.4693e-05	3.70688	0.000127318
3.64988	1.85638e-05	3.64988	0.000111603	3.67787	8.26721e-05	3.69688	7.8064e-05	3.71688	4.46838e-05	3.71688	0.000126761
3.65988	1.8457e-05	3.65988	0.000111633	3.68787	8.26111e-05	3.70688	7.79724e-05	3.72688	4.46533e-05	3.72688	0.000127296
3.66988	1.84692e-05	3.66988	0.000111542	3.69787	8.25806e-05	3.71688	7.79419e-05	3.73688	4.46198e-05	3.73688	0.000126728
3.67988	1.84113e-05	3.67988	0.000111572	3.70787	8.2489e-05	3.72688	7.78809e-05	3.74688	4.46106e-05	3.74688	0.000127252
3.68988	1.83746e-05	3.68988	0.000111511	3.71787	8.24585e-05	3.73688	7.78198e-05	3.75688	4.45953e-05	3.75688	0.000126684
3.69988	1.83044e-05	3.69988	0.000111542	3.72787	8.23975e-05	3.74688	7.77588e-05	3.76688	4.4574e-05	3.76688	0.000127219
3.70988	1.82709e-05	3.70988	0.000111481	3.73787	8.23364e-05	3.75688	7.77283e-05	3.77688	4.45496e-05	3.77688	0.000126652
3.71988	1.82434e-05	3.71988	0.000111481	3.74787	8.22754e-05	3.76688	7.76672e-05	3.78688	4.45343e-05	3.78688	0.000127187
3.72988	1.81854e-05	3.72988	0.00011142	3.75787	8.22449e-05	3.77688	7.76062e-05	3.79688	4.44946e-05	3.79688	0.000126619
3.73988	1.81366e-05	3.73988	0.00011142	3.76787	8.21838e-05	3.78688	7.75146e-05	3.80688	4.44885e-05	3.80688	0.000127154
3.74988	1.81e-05	3.74988	0.000111389	3.77787	8.20923e-05	3.79688	7.75146e-05	3.81688	4.44489e-05	3.81688	0.000126575
3.75988	1.8042e-05	3.75988	0.000111359	3.78787	8.20923e-05	3.80688	7.74231e-05	3.82688	4.44458e-05	3.82688	0.000127121
3.76988	1.80237e-05	3.76988	0.000111359	3.79787	8.20007e-05	3.81688	7.73926e-05	3.83688	4.44061e-05	3.83688	0.000126542
3.77988	1.79535e-05	3.77988	0.000111328	3.80787	8.19702e-05	3.82688	7.73315e-05	3.84688	4.43878e-05	3.84688	0.000127088
3.78988	1.79321e-05	3.78988	0.000111298	3.81787	8.19397e-05	3.83688	7.7301e-05	3.85688	4.43512e-05	3.85688	0.000126521
3.79988	1.78741e-05	3.79988	0.000111328	3.82787	8.18787e-05	3.84688	7.7179e-05	3.86688	4.4342e-05	3.86688	0.000127067
3.80988	1.78497e-05	3.80988	0.000111298	3.83787	8.18176e-05	3.85688	7.71484e-05	3.87688	4.43115e-05	3.87688	0.000126488
3.81988	1.7804e-05	3.81988	0.000111267	3.84787	8.17871e-05	3.86688	7.70874e-05	3.88688	4.42902e-05	3.88688	0.000127045
3.82988	1.77521e-05	3.82988	0.000111237	3.85787	8.17261e-05	3.87688	7.70569e-05	3.89688	4.42596e-05	3.89688	0.000126455
3.83988	1.77063e-05	3.83988	0.000111206	3.86787	8.1665e-05	3.88688	7.69958e-05	3.90688	4.42444e-05	3.90688	0.000126979
3.84988	1.76849e-05	3.84988	0.000111176	3.87787	8.16345e-05	3.89688	7.69653e-05	3.91688	4.422e-05	3.91688	0.000126411
3.85988	1.76392e-05	3.85988	0.000111206	3.88787	8.15735e-05	3.90688	7.69043e-05	3.92688	4.42017e-05	3.92688	0.000126957
3.86988	1.76086e-05	3.86988	0.000111145	3.89787	8.15125e-05	3.91688	7.68433e-05	3.93688	4.41864e-05	3.93688	0.000126379
3.87988	1.75354e-05	3.87988	0.000111115	3.90787	8.14514e-05	3.92688	7.67517e-05	3.94688	4.4162e-05	3.94688	0.000126946
3.88988	1.7514e-05	3.88988	0.000111084	3.91787	8.14209e-05	3.93688	7.67517e-05	3.95688	4.41345e-05	3.95688	0.000126379
3.89988	1.74774e-05	3.89988	0.000111145	3.92787	8.13599e-05	3.94688	7.66296e-05	3.96688	4.41101e-05	3.96688	0.000126925
3.90988	1.74622e-05	3.90988	0.000111053	3.93787	8.13293e-05	3.95688	7.66296e-05	3.97688	4.4101e-05	3.97688	0.000126346
3.91988	1.73706e-05	3.91988	0.000111115	3.94787	8.12378e-05	3.96688	7.65381e-05	3.98688	4.40643e-05	3.98688	0.000126892
3.92988	1.73798e-05	3.92988	0.000111023	3.95787	8.12378e-05	3.97688	7.65381e-05	3.99688	4.40582e-05	3.99688	0.000126302
3.93988	1.73096e-05	3.93988	0.000111084	3.96787	8.11768e-05	3.98688	7.64465e-05	4.00688	4.40308e-05	4.00688	0.000126859
3.94988	1.73096e-05	3.94988	0.000110992	3.97787	8.11462e-05	3.99688	7.6416e-05	4.01688	4.40094e-05	4.01688	0.00012628
3.95988	1.72394e-05	3.95988	0.000110992	3.98787	8.10547e-05	4.00688	7.6355e-05	4.02688	4.40033e-05	4.02688	0.000126837
3.96988	1.72241e-05	3.96988	0.000110931	3.99787	8.10547e-05	4.01688	7.63245e-05	4.03688	4.39667e-05	4.03688	0.000126259
3.97988	1.71478e-05	3.97988	0.000110962	4.00787	8.09631e-05	4.02688	7.62634e-05	4.04688	4.39453e-05	4.04688	0.000126815
3.98988	1.71478e-05	3.98988	0.000110901	4.01787	8.09631e-05	4.03688	7.62329e-05	4.05688	4.39423e-05	4.05688	0.000126226
3.99988	1.70654e-05	3.99988	0.000110992	4.02787	8.08716e-05	4.04688	7.61414e-05	4.06688	4.39026e-05	4.06688	0.000126783
4.00988	1.70654e-05	4.00988	0.00011087	4.03787	8.08411e-05	4.05688	7.61414e-05	4.07688	4.39026e-05	4.07688	0.000126182
4.01988	1.69983e-05	4.01988	0.000110901	4.04787	8.078e-05	4.06688	7.60193e-05	4.08688	4.38629e-05	4.08688	0.000126728
4.02988	1.69983e-05	4.02988	0.00011084	4.05787	8.078e-05	4.07688	7.60193e-05	4.09688	4.38568e-05	4.09688	0.000126138
4.03988	1.69525e-05	4.03988	0.000110901	4.06787	8.06885e-05	4.08688	7.59583e-05	4.10688	4.38324e-05	4.10688	0.000126706
4.04988	1.69159e-05	4.04988	0.000110779	4.07787	8.06885e-05	4.09688	7.59277e-05	4.11688	4.38141e-05	4.11688	0.000126106
4.05988	1.68671e-05	4.05988	0.000110809	4.08787	8.06274e-05	4.10688	7.58667e-05	4.12688	4.37988e-05	4.12688	0.000126674
4.06988	1.68518e-05	4.06988	0.000110718	4.09787	8.05969e-05	4.11688	7.58362e-05	4.13688	4.37653e-05	4.13688	0.000126084
4.07988	1.67816e-05	4.07988	0.000110809	4.10787	8.05054e-05	4.12688	7.57446e-05	4.14688	4.37561e-05	4.14688	0.000126663
4.08988	1.67725e-05	4.08988	0.000110718	4.11787	8.05054e-05	4.13688	7.57446e-05	4.15688	4.37317e-05	4.15688	0.000126062
4.09988	1.67206e-05	4.09988	0.000110748	4.12787	8.04138e-05	4.14688	7.56531e-05	4.16688	4.37164e-05	4.16688	0.000126641
4.10988	1.66992e-05	4.10988	0.000110687	4.13787	8.04138e-05	4.15688	7.56531e-05	4.17688	4.3692e-05	4.17688	0.00012604
4.11988	1.66534e-05	4.11988	0.000110718	4.14787	8.03223e-05	4.16688	7.5531e-05	4.18688	4.36737e-05	4.18688	0.000126619
4.12988	1.66534e-05	4.12988	0.000110657	4.15787	8.03223e-05	4.17688	7.5531e-05	4.19688	4.36371e-05	4.19688	0.000126007
4.13988	1.65649e-05	4.13988	0.000110687	4.16787	8.02307e-05	4.18688	7.547e-05	4.20688	4.3634e-05	4.20688	0.000126575
4.14988	1.65833e-05	4.14988	0.000110596	4.17787	8.02307e-05	4.19688	7.54395e-05	4.21688	4.36096e-05	4.21688	0.000125953
4.15988	1.65161e-05	4.15988	0.000110626	4.18787	8.01392e-05	4.20688	7.53479e-05	4.22688	4.36035e-05	4.22688	0.000126542
4.16988	1.65192e-05	4.16988	0.000110565	4.19787	8.01392e-05	4.21688	7.53479e-05	4.23688	4.35699e-05	4.23688	0.000125931
4.17988	1.64398e-05	4.17988	0.000110596	4.20787	8.00781e-05	4.22688	7.52869e-05	4.24688	4.3573e-05	4.24688	0.00012651
4.18988	1.64337e-05	4.18988	0.000110565	4.21787	8.00171e-05	4.23688	7.52869e-05	4.25688	4.35394e-05	4.25688	0.000125909
4.19988	1.63757e-05	4.19988	0.000110565	4.22787	7.99561e-05	4.24688	7.51953e-05	4.26688	4.35211e-05	4.26688	0.00012651
4.20988	1.63788e-05	4.20988	0.000110504	4.23787	7.99561e-05	4.25688	7.51648e-05	4.27688	4.34937e-05	4.27688	0.000125887
4.21988	1.62933e-05	4.21988	0.000110565	4.24787	7.9895e-05	4.26688	7.51038e-05	4.28688	4.34967e-05	4.28688	0.000126477
4.22988	1.63086e-05	4.22988	0.000110474	4.25787	7.9895e-05	4.27688	7.50732e-05	4.29688	4.34631e-05	4.29688	0.000125865
4.23988	1.6214e-05	4.23988	0.000110504	4.26787	7.98035e-05	4.28688	7.50122e-05	4.30688	4.3457e-05	4.30688	0.000126444
4.24988	1.62445e-05	4.24988	0.000110443	4.27787	7.98035e-05	4.29688	7.50122e-05	4.31688	4.34174e-05	4.31688	0.000125822
4.25988	1.61652e-05	4.25988	0.000110474	4.28787	7.97424e-05	4.30688	7.49207e-05	4.32688	4.34113e-05	4.32688	0.000126401
4.26988	1.61804e-05	4.26988	0.000110382	4.29787	7.97424e-05	4.31688	7.48901e-05	4.33688	4.33807e-05	4.33688	0.000125789
4.27988	1.61163e-05	4.27988	0.000110474	4.30787	7.96204e-05	4.32688	7.47986e-05	4.34688	4.33746e-05	4.34688	0.000126357
4.28988	1.61102e-05	4.28988	0.000110352	4.31787	7.96509e-05	4.33688	7.47986e-05	4.35688	4.33594e-05	4.35688	0.000125745
4.29988	1.60309e-05	4.29988	0.000110382	4.32787	7.95593e-05	4.34688	7.47681e-05	4.36688	4.33533e-05	4.36688	0.000126324
4.30988	1.60431e-05	4.30988	0.000110321	4.33787	7.95288e-05	4.35688	7.4707e-05	4.37688	4.33075e-05	4.37688	0.000125713
4.31988	1.59851e-05	4.31988	0.000110382	4.34787	7.94678e-05	4.36688	7.4646e-05	4.38688	4.33197e-05	4.38688	0.00012628
4.32988	1.59882e-05	4.32988	0.000110321	4.35787	7.94678e-05	4.37688	7.46155e-05	4.39688	4.32678e-05	4.39688	0.00012568
4.33988	1.59454e-05	4.33988	0.000110352	4.36787	7.93457e-05	4.38688	7.45544e-05	4.40688	4.32526e-05	4.40688	0.000126259
4.34988	1.59302e-05	4.34988	0.000110291	4.37787	7.93762e-05	4.39688	7.45239e-05	4.41688	4.32343e-05	4.41688	0.000125658
4.35988	1.58661e-05	4.35988	0.000110321	4.38787	7.92847e-05	4.40688	7.44934e-05	4.42688	4.32159e-05	4.42688	0.000126237
4.36988	1.58569e-05	4.36988	0.00011026	4.39787	7.92847e-05	4.41688	7.44629e-05	4.43688	4.31946e-05	4.43688	0.000125636
4.37988	1.57806e-05	4.37988	0.00011026	4.40787	7.92236e-05	4.42688	7.44019e-05	4.44688	4.31793e-05	4.44688	0.000126204
4.38988	1.57745e-05	4.38988	0.000110229	4.41787	7.91931e-05	4.43688	7.43713e-05	4.45688	4.31549e-05	4.45688	0.000125603
4.39988	1.57684e-05	4.39988	0.00011026	4.42787	7.91321e-05	4.44688	7.43103e-05	4.46688	4.31549e-05	4.46688	0.000126171
4.40988	1.57349e-05	4.40988	0.000110168	4.43787	7.91321e-05	4.45688	7.42493e-05	4.47688	4.31183e-05	4.47688	0.000125582
4.41988	1.56647e-05	4.41988	0.000110229	4.44787	7.90405e-05	4.46688	7.42493e-05	4.48688	4.31213e-05	4.48688	0.000126149
4.42988	1.56891e-05	4.42988	0.000110138	4.45787	7.90405e-05	4.47688	7.41882e-05	4.49688	4.30817e-05	4.49688	0.00012556
4.43988	1.56189e-05	4.43988	0.000110168	4.46787	7.89795e-05	4.48688	7.41272e-05	4.50688	4.30847e-05	4.50688	0.000126117
4.44988	1.56097e-05	4.44988	0.000110107	4.47787	7.89795e-05	4.49688	7.40967e-05	4.51688	4.3042e-05	4.51688	0.000125516
4.45988	1.55701e-05	4.45988	0.000110138	4.48787	7.88879e-05	4.50688	7.40662e-05	4.52688	4.30389e-05	4.52688	0.000126084
4.46988	1.55701e-05	4.46988	0.000110077	4.49787	7.88879e-05	4.51688	7.40051e-05	4.53688	4.30206e-05	4.53688	0.000125483
4.47988	1.54846e-05	4.47988	0.000110107	4.50787	7.88269e-05	4.52688	7.39746e-05	4.54688	4.30054e-05	4.54688	0.00012604
4.48988	1.55151e-05	4.48988	0.000110046	4.51787	7.88269e-05	4.53688	7.39746e-05	4.55688	4.2984e-05	4.55688	0.000125461
4.49988	1.54572e-05	4.49988	0.000110077	4.52787	7.87659e-05	4.54688	7.39136e-05	4.56688	4.29779e-05	4.56688	0.000126018
4.50988	1.54236e-05	4.50988	0.000110016	4.53787	7.87354e-05	4.55688	7.38831e-05	4.57688	4.29413e-05	4.57688	0.000125407
4.51988	1.54022e-05	4.51988	0.000110046	4.54787	7.86743e-05	4.56688	7.37915e-05	4.58688	4.29688e-05	4.58688	0.000125964
4.52988	1.53961e-05	4.52988	0.000109985	4.55787	7.86743e-05	4.57688	7.37915e-05	4.59688	4.29138e-05	4.59688	0.000125374
4.53988	1.53351e-05	4.53988	0.000110046	4.56787	7.85828e-05	4.58688	7.37305e-05	4.60688	4.29291e-05	4.60688	0.000125909
4.54988	1.53412e-05	4.54988	0.000109955	4.57787	7.85522e-05	4.59688	7.37305e-05	4.61688	4.28711e-05	4.61688	0.00012533
4.55988	1.52527e-05	4.55988	0.000109985	4.58787	7.84912e-05	4.60688	7.36389e-05	4.62688	4.28772e-05	4.62688	0.000125898
4.56988	1.52832e-05	4.56988	0.000109955	4.59787	7.85217e-05	4.61688	7.36389e-05	4.63688	4.28528e-05	4.63688	0.00012533
4.57988	1.52222e-05	4.57988	0.000109955	4.60787	7.84302e-05	4.62688	7.35474e-05	4.64688	4.28497e-05	4.64688	0.000125865
4.58988	1.5213e-05	4.58988	0.000109863	4.61787	7.84302e-05	4.63688	7.35474e-05	4.65688	4.2804e-05	4.65688	0.000125298
4.59988	1.51764e-05	4.59988	0.000109924	4.62787	7.83386e-05	4.64688	7.34863e-05	4.66688	4.28192e-05	4.66688	0.000125833
4.60988	1.5152e-05	4.60988	0.000109863	4.63787	7.83386e-05	4.65688	7.34558e-05	4.67688	4.27704e-05	4.67688	0.000125243
4.61988	1.51001e-05	4.61988	0.000109924	4.64787	7.82776e-05	4.66688	7.33948e-05	4.68688	4.27887e-05	4.68688	0.000125767
4.62988	1.5097e-05	4.62988	0.000109833	4.65787	7.83081e-05	4.67688	7.33948e-05	4.69688	4.27521e-05	4.69688	0.000125199
4.63988	1.50635e-05	4.63988	0.000109894	4.66787	7.82166e-05	4.68688	7.33032e-05	4.70688	4.27612e-05	4.70688	0.000125724
4.64988	1.50452e-05	4.64988	0.000109772	4.67787	7.82166e-05	4.69688	7.33643e-05	4.71688	4.27185e-05	4.71688	0.000125167
4.65988	1.50116e-05	4.65988	0.000109863	4.68787	7.81555e-05	4.70688	7.32422e-05	4.72688	4.27216e-05	4.72688	0.000125702
4.66988	1.50024e-05	4.66988	0.000109772	4.69787	7.81555e-05	4.71688	7.32422e-05	4.73688	4.2688e-05	4.73688	0.000125145
4.67988	1.49384e-05	4.67988	0.000109863	4.70787	7.80945e-05	4.72688	7.31812e-05	4.74688	4.26849e-05	4.74688	0.00012568
4.68988	1.49384e-05	4.68988	0.000109772	4.71787	7.80945e-05	4.73688	7.31812e-05	4.75688	4.26697e-05	4.75688	0.000125134
4.69988	1.49109e-05	4.69988	0.000109772	4.72787	7.80029e-05	4.74688	7.30896e-05	4.76688	4.26605e-05	4.76688	0.000125647
4.70988	1.48834e-05	4.70988	0.000109711	4.73787	7.80029e-05	4.75688	7.30896e-05	4.77688	4.26117e-05	4.77688	0.000125101
4.71988	1.48529e-05	4.71988	0.000109772	4.74787	7.79419e-05	4.76688	7.30286e-05	4.78688	4.26178e-05	4.78688	0.000125614
4.72988	1.48651e-05	4.72988	0.000109711	4.75787	7.79114e-05	4.77688	7.30286e-05	4.79688	4.25934e-05	4.79688	0.000125068
4.73988	1.4798e-05	4.73988	0.000109741	4.76787	7.78809e-05	4.78688	7.29675e-05	4.80688	4.25812e-05	4.80688	0.000125571
4.74988	1.47949e-05	4.74988	0.00010968	4.77787	7.78503e-05	4.79688	7.29675e-05	4.81688	4.25446e-05	4.81688	0.000125036
4.75988	1.47369e-05	4.75988	0.000109711	4.78787	7.77893e-05	4.80688	7.28455e-05	4.82688	4.2572e-05	4.82688	0.000125527
4.76988	1.47491e-05	4.76988	0.00010965	4.79787	7.77893e-05	4.81688	7.2876e-05	4.83688	4.2514e-05	4.83688	0.000124992
4.77988	1.46912e-05	4.77988	0.00010968	4.80787	7.77283e-05	4.82688	7.28149e-05	4.84688	4.25323e-05	4.84688	0.000125483
4.78988	1.46759e-05	4.78988	0.00010965	4.81787	7.77283e-05	4.83688	7.28149e-05	4.85688	4.25201e-05	4.85688	0.000124959
4.79988	1.46576e-05	4.79988	0.000109619	4.82787	7.76367e-05	4.84688	7.27234e-05	4.86688	4.25079e-05	4.86688	0.000125451
4.80988	1.46362e-05	4.80988	0.000109558	4.83787	7.76367e-05	4.85688	7.27234e-05	4.87688	4.24744e-05	4.87688	0.000124937
4.81988	1.45966e-05	4.81988	0.000109619	4.84787	7.75757e-05	4.86688	7.26624e-05	4.88688	4.24683e-05	4.88688	0.000125418
4.82988	1.45813e-05	4.82988	0.000109528	4.85787	7.75757e-05	4.87688	7.26624e-05	4.89688	4.24347e-05	4.89688	0.000124916
4.83988	1.45538e-05	4.83988	0.000109619	4.86787	7.75452e-05	4.88688	7.26013e-05	4.90688	4.24408e-05	4.90688	0.000125396
4.84988	1.45477e-05	4.84988	0.000109558	4.87787	7.74841e-05	4.89688	7.25708e-05	4.91688	4.24072e-05	4.91688	0.000124883
4.85988	1.44958e-05	4.85988	0.000109589	4.88787	7.74841e-05	4.90688	7.25098e-05	4.92688	4.24164e-05	4.92688	0.000125352
4.86988	1.4502e-05	4.86988	0.000109528	4.89787	7.74536e-05	4.91688	7.25098e-05	4.93688	4.23645e-05	4.93688	0.000124872
4.87988	1.44562e-05	4.87988	0.000109558	4.90787	7.73621e-05	4.92688	7.24487e-05	4.94688	4.23737e-05	4.94688	0.00012533
4.88988	1.4447e-05	4.88988	0.000109467	4.91787	7.73926e-05	4.93688	7.24487e-05	4.95688	4.2334e-05	4.95688	0.000124839
4.89988	1.43982e-05	4.89988	0.000109528	4.92787	7.73315e-05	4.94688	7.23572e-05	4.96688	4.23431e-05	4.96688	0.000125309
4.90988	1.44012e-05	4.90988	0.000109436	4.93787	7.73315e-05	4.95688	7.23877e-05	4.97688	4.23065e-05	4.97688	0.000124828
4.91988	1.43555e-05	4.91988	0.000109497	4.94787	7.724e-05	4.96688	7.23267e-05	4.98688	4.23431e-05	4.98688	0.000125265
4.92988	1.43494e-05	4.92988	0.000109436	4.95787	7.724e-05	4.97688	7.22961e-05	4.99688	4.22821e-05	4.99688	0.000124784
4.93988	1.43188e-05	4.93988	0.000109497	4.96787	7.7179e-05	4.98688	7.22046e-05	5.00688	4.2276e-05	5.00688	0.000125221
4.94988	1.43097e-05	4.94988	0.000109406	4.97787	7.7179e-05	4.99688	7.22656e-05	5.01688	4.22577e-05	5.01688	0.00012473
4.95988	1.42487e-05	4.95988	0.000109436	4.98787	7.70874e-05	5.00688	7.21741e-05	5.02688	4.22607e-05	5.02688	0.000125167
4.96988	1.42426e-05	4.96988	0.000109375	4.99787	7.71179e-05	5.01688	7.21741e-05	5.03688	4.22241e-05	5.03688	0.000124697
4.97988	1.42212e-05	4.97988	0.000109406	5.00787	7.70569e-05	5.02688	7.2113e-05	5.04688	4.22211e-05	5.04688	0.000125134
4.98988	1.42303e-05	4.98988	0.000109344	5.01787	7.70264e-05	5.03688	7.2113e-05	5.05688	4.21906e-05	5.05688	0.000124686
4.99988	1.41876e-05	4.99988	0.000109436	5.02787	7.69653e-05	5.04688	7.20215e-05	5.06688	4.22089e-05	5.06688	0.000125123
5.00988	1.41571e-05	5.00988	0.000109314	5.03787	7.69958e-05	5.05688	7.2052e-05	5.07688	4.21753e-05	5.07688	0.000124664
5.01988	1.41296e-05	5.01988	0.000109344	5.04787	7.69043e-05	5.06688	7.19604e-05	5.08688	4.21661e-05	5.08688	0.00012509
5.02988	1.41235e-05	5.02988	0.000109283	5.05787	7.69043e-05	5.07688	7.19604e-05	5.09688	4.21326e-05	5.09688	0.000124632
5.03988	1.4093e-05	5.03988	0.000109344	5.06787	7.68433e-05	5.08688	7.18994e-05	5.10688	4.21509e-05	5.10688	0.000125036
5.04988	1.40686e-05	5.04988	0.000109314	5.07787	7.68433e-05	5.09688	7.18994e-05	5.11688	4.2099e-05	5.11688	0.000124588
5.05988	1.40625e-05	5.05988	0.000109344	5.08787	7.67822e-05	5.10688	7.18079e-05	5.12688	4.21173e-05	5.12688	0.000124992
5.06988	1.4032e-05	5.06988	0.000109253	5.09787	7.67822e-05	5.11688	7.18079e-05	5.13688	4.20807e-05	5.13688	0.000124544
5.07988	1.40045e-05	5.07988	0.000109283	5.10787	7.67212e-05	5.12688	7.17773e-05	5.14688	4.20837e-05	5.14688	0.000124959
5.08988	1.39954e-05	5.08988	0.000109283	5.11787	7.67212e-05	5.13688	7.17468e-05	5.15688	4.20532e-05	5.15688	0.000124522
5.09988	1.39526e-05	5.09988	0.000109253	5.12787	7.66602e-05	5.14688	7.16858e-05	5.16688	4.20563e-05	5.16688	0.000124926
5.10988	1.39465e-05	5.10988	0.000109222	5.13787	7.66296e-05	5.15688	7.16858e-05	5.17688	4.20288e-05	5.17688	0.00012449
5.11988	1.39008e-05	5.11988	0.000109222	5.14787	7.65686e-05	5.16688	7.16553e-05	5.18688	4.20288e-05	5.18688	0.000124894
5.12988	1.38824e-05	5.12988	0.000109222	5.15787	7.65991e-05	5.17688	7.16553e-05	5.19688	4.20044e-05	5.19688	0.000124468
5.13988	1.38885e-05	5.13988	0.000109222	5.16787	7.65381e-05	5.18688	7.15637e-05	5.20688	4.20197e-05	5.20688	0.00012485
5.14988	1.38794e-05	5.14988	0.000109192	5.17787	7.65076e-05	5.19688	7.15942e-05	5.21688	4.19983e-05	5.21688	0.000124413
5.15988	1.38153e-05	5.15988	0.000109192	5.18787	7.64465e-05	5.20688	7.15027e-05	5.22688	4.198e-05	5.22688	0.000124806
5.16988	1.38123e-05	5.16988	0.000109161	5.19787	7.64465e-05	5.21688	7.15027e-05	5.23688	4.19464e-05	5.23688	0.000124402
5.17988	1.37878e-05	5.17988	0.000109161	5.20787	7.6416e-05	5.22688	7.14417e-05	5.24688	4.19373e-05	5.24688	0.000124774
5.18988	1.3797e-05	5.18988	0.000109131	5.21787	7.63855e-05	5.23688	7.14417e-05	5.25688	4.19067e-05	5.25688	0.00012437
5.19988	1.3736e-05	5.19988	0.000109161	5.22787	7.63245e-05	5.24688	7.13501e-05	5.26688	4.19159e-05	5.26688	0.000124763
5.20988	1.3739e-05	5.20988	0.0001091	5.23787	7.63245e-05	5.25688	7.13806e-05	5.27688	4.18945e-05	5.27688	0.000124359
5.21988	1.36841e-05	5.21988	0.000109131	5.24787	7.62634e-05	5.26688	7.13196e-05	5.28688	4.18854e-05	5.28688	0.000124719
5.22988	1.37024e-05	5.22988	0.00010907	5.25787	7.62634e-05	5.27688	7.13196e-05	5.29688	4.18579e-05	5.29688	0.000124315
5.23988	1.36536e-05	5.23988	0.0001091	5.26787	7.62024e-05	5.28688	7.1228e-05	5.30688	4.1864e-05	5.30688	0.000124686
5.24988	1.36597e-05	5.24988	0.000109039	5.27787	7.62024e-05	5.29688	7.12585e-05	5.31688	4.18304e-05	5.31688	0.000124282
5.25988	1.36017e-05	5.25988	0.00010907	5.28787	7.61414e-05	5.30688	7.1167e-05	5.32688	4.18518e-05	5.32688	0.000124653
5.26988	1.36139e-05	5.26988	0.000109039	5.29787	7.61414e-05	5.31688	7.11975e-05	5.33688	4.17938e-05	5.33688	0.000124249
5.27988	1.35681e-05	5.27988	0.00010907	5.30787	7.60803e-05	5.32688	7.11365e-05	5.34688	4.18213e-05	5.34688	0.000124621
5.28988	1.35742e-05	5.28988	0.000109039	5.31787	7.60803e-05	5.33688	7.1106e-05	5.35688	4.1806e-05	5.35688	0.000124239
5.29988	1.35345e-05	5.29988	0.000109039	5.32787	7.60193e-05	5.34688	7.10754e-05	5.36688	4.17847e-05	5.36688	0.000124599
5.30988	1.35376e-05	5.30988	0.000108978	5.33787	7.60193e-05	5.35688	7.10754e-05	5.37688	4.17664e-05	5.37688	0.000124206
5.31988	1.34979e-05	5.31988	0.000109009	5.34787	7.59583e-05	5.36688	7.10144e-05	5.38688	4.17511e-05	5.38688	0.000124555
5.32988	1.3501e-05	5.32988	0.000108917	5.35787	7.59583e-05	5.37688	7.10144e-05	5.39688	4.17389e-05	5.39688	0.000124173
5.33988	1.34583e-05	5.33988	0.000109009	5.36787	7.59277e-05	5.38688	7.09229e-05	5.40688	4.17419e-05	5.40688	0.000124501
5.34988	1.34613e-05	5.34988	0.000108917	5.37787	7.58972e-05	5.39688	7.09839e-05	5.41688	4.17114e-05	5.41688	0.000124118
5.35988	1.34247e-05	5.35988	0.000109009	5.38787	7.58667e-05	5.40688	7.08923e-05	5.42688	4.17084e-05	5.42688	0.000124435
5.36988	1.3443e-05	5.36988	0.000108887	5.39787	7.58362e-05	5.41688	7.08923e-05	5.43688	4.16656e-05	5.43688	0.000124086
5.37988	1.33514e-05	5.37988	0.000108948	5.40787	7.58057e-05	5.42688	7.08008e-05	5.44688	4.16748e-05	5.44688	0.000124402
5.38988	1.3382e-05	5.38988	0.000108856	5.41787	7.57751e-05	5.43688	7.08313e-05	5.45688	4.16534e-05	5.45688	0.000124064
5.39988	1.33362e-05	5.39988	0.000108917	5.42787	7.57446e-05	5.44688	7.07703e-05	5.46688	4.16443e-05	5.46688	0.00012437
5.40988	1.33667e-05	5.40988	0.000108887	5.43787	7.56836e-05	5.45688	7.07703e-05	5.47688	4.16199e-05	5.47688	0.000124042
5.41988	1.32813e-05	5.41988	0.000108887	5.44787	7.56836e-05	5.46688	7.07092e-05	5.48688	4.1626e-05	5.48688	0.000124359
5.42988	1.32996e-05	5.42988	0.000108856	5.45787	7.56531e-05	5.47688	7.07397e-05	5.49688	4.15802e-05	5.49688	0.000124031
5.43988	1.32416e-05	5.43988	0.000108856	5.46787	7.56226e-05	5.48688	7.06482e-05	5.50688	4.15955e-05	5.50688	0.000124326
5.44988	1.32813e-05	5.44988	0.000108826	5.47787	7.5592e-05	5.49688	7.06482e-05	5.51688	4.15771e-05	5.51688	0.000124009
5.45988	1.32111e-05	5.45988	0.000108856	5.48787	7.55615e-05	5.50688	7.05872e-05	5.52688	4.15558e-05	5.52688	0.000124304
5.46988	1.32324e-05	5.46988	0.000108826	5.49787	7.5531e-05	5.51688	7.06177e-05	5.53688	4.15375e-05	5.53688	0.000123966
5.47988	1.31927e-05	5.47988	0.000108856	5.50787	7.55005e-05	5.52688	7.05566e-05	5.54688	4.15314e-05	5.54688	0.000124249
5.48988	1.31744e-05	5.48988	0.000108765	5.51787	7.547e-05	5.53688	7.05566e-05	5.55688	4.15192e-05	5.55688	0.000123944
5.49988	1.315e-05	5.49988	0.000108826	5.52787	7.54395e-05	5.54688	7.04651e-05	5.56688	4.15192e-05	5.56688	0.000124228
5.50988	1.31592e-05	5.50988	0.000108795	5.53787	7.54089e-05	5.55688	7.04651e-05	5.57688	4.14948e-05	5.57688	0.000123933
5.51988	1.31042e-05	5.51988	0.000108765	5.54787	7.53784e-05	5.56688	7.04346e-05	5.58688	4.15039e-05	5.58688	0.000124217
5.52988	1.31317e-05	5.52988	0.000108765	5.55787	7.53784e-05	5.57688	7.04041e-05	5.59688	4.14673e-05	5.59688	0.000123933
5.53988	1.30585e-05	5.53988	0.000108734	5.56787	7.53174e-05	5.58688	7.03735e-05	5.60688	4.14703e-05	5.60688	0.000124184
5.54988	1.30737e-05	5.54988	0.000108704	5.57787	7.53174e-05	5.59688	7.03735e-05	5.61688	4.1449e-05	5.61688	0.0001239
5.55988	1.3028e-05	5.55988	0.000108734	5.58787	7.52869e-05	5.60688	7.0282e-05	5.62688	4.14368e-05	5.62688	0.000124151
5.56988	1.3031e-05	5.56988	0.000108704	5.59787	7.52563e-05	5.61688	7.03125e-05	5.63688	4.14246e-05	5.63688	0.000123878
5.57988	1.30066e-05	5.57988	0.000108734	5.60787	7.52258e-05	5.62688	7.02515e-05	5.64688	4.14093e-05	5.64688	0.000124118
5.58988	1.29944e-05	5.58988	0.000108704	5.61787	7.51953e-05	5.63688	7.02515e-05	5.65688	4.14032e-05	5.65688	0.000123856
5.59988	1.29761e-05	5.59988	0.000108704	5.62787	7.51648e-05	5.64688	7.01904e-05	5.66688	4.13849e-05	5.66688	0.000124097
5.60988	1.29517e-05	5.60988	0.000108643	5.63787	7.51343e-05	5.65688	7.01904e-05	5.67688	4.13849e-05	5.67688	0.000123845
5.61988	1.2912e-05	5.61988	0.000108704	5.64787	7.51038e-05	5.66688	7.01294e-05	5.68688	4.13666e-05	5.68688	0.000124064
5.62988	1.29242e-05	5.62988	0.000108643	5.65787	7.50732e-05	5.67688	7.01294e-05	5.69688	4.13544e-05	5.69688	0.000123813
5.63988	1.29028e-05	5.63988	0.000108673	5.66787	7.50732e-05	5.68688	7.00989e-05	5.70688	4.13361e-05	5.70688	0.00012402
5.64988	1.28723e-05	5.64988	0.000108612	5.67787	7.50122e-05	5.69688	7.00989e-05	5.71688	4.133e-05	5.71688	0.00012378
5.65988	1.28601e-05	5.65988	0.000108612	5.68787	7.49817e-05	5.70688	7.00378e-05	5.72688	4.13147e-05	5.72688	0.000123966
5.66988	1.28479e-05	5.66988	0.000108582	5.69787	7.49817e-05	5.71688	7.00378e-05	5.73688	4.13116e-05	5.73688	0.000123747
5.67988	1.28296e-05	5.67988	0.000108612	5.70787	7.49512e-05	5.72688	6.99768e-05	5.74688	4.12933e-05	5.74688	0.000123922
5.68988	1.28143e-05	5.68988	0.000108582	5.71787	7.49207e-05	5.73688	6.99768e-05	5.75688	4.12781e-05	5.75688	0.000123714
5.69988	1.28082e-05	5.69988	0.000108612	5.72787	7.48901e-05	5.74688	6.99158e-05	5.76688	4.12598e-05	5.76688	0.000123889
5.70988	1.2793e-05	5.70988	0.000108582	5.73787	7.48596e-05	5.75688	6.99463e-05	5.77688	4.12567e-05	5.77688	0.000123703
5.71988	1.27808e-05	5.71988	0.000108582	5.74787	7.48596e-05	5.76688	6.98853e-05	5.78688	4.12506e-05	5.78688	0.000123856
5.72988	1.27655e-05	5.72988	0.000108551	5.75787	7.47986e-05	5.77688	6.98547e-05	5.79688	4.12354e-05	5.79688	0.000123682
5.73988	1.27258e-05	5.73988	0.000108521	5.76787	7.47986e-05	5.78688	6.97937e-05	5.80688	4.12231e-05	5.80688	0.000123824
5.74988	1.27441e-05	5.74988	0.00010849	5.77787	7.47375e-05	5.79688	6.97937e-05	5.81688	4.1214e-05	5.81688	0.00012366
5.75988	1.26801e-05	5.75988	0.00010849	5.78787	7.47375e-05	5.80688	6.97632e-05	5.82688	4.11926e-05	5.82688	0.00012378
5.76988	1.27075e-05	5.76988	0.000108521	5.79787	7.4707e-05	5.81688	6.97632e-05	5.83688	4.11835e-05	5.83688	0.000123616
5.77988	1.26587e-05	5.77988	0.00010849	5.80787	7.46765e-05	5.82688	6.97327e-05	5.84688	4.11743e-05	5.84688	0.000123725
5.78988	1.26404e-05	5.78988	0.000108521	5.81787	7.4646e-05	5.83688	6.97021e-05	5.85688	4.11591e-05	5.85688	0.000123583
5.79988	1.26282e-05	5.79988	0.000108459	5.82787	7.46155e-05	5.84688	6.96411e-05	5.86688	4.11621e-05	5.86688	0.000123682
5.80988	1.26251e-05	5.80988	0.00010849	5.83787	7.4585e-05	5.85688	6.96716e-05	5.87688	4.11377e-05	5.87688	0.000123562
5.81988	1.26129e-05	5.81988	0.000108429	5.84787	7.4585e-05	5.86688	6.96106e-05	5.88688	4.11316e-05	5.88688	0.000123649
5.82988	1.25763e-05	5.82988	0.000108459	5.85787	7.45544e-05	5.87688	6.96106e-05	5.89688	4.11255e-05	5.89688	0.00012354
5.83988	1.25519e-05	5.83988	0.000108429	5.86787	7.45239e-05	5.88688	6.95496e-05	5.90688	4.11224e-05	5.90688	0.000123616
5.84988	1.2561e-05	5.84988	0.000108429	5.87787	7.44934e-05	5.89688	6.95496e-05	5.91688	4.10889e-05	5.91688	0.000123507
5.85988	1.25458e-05	5.85988	0.000108429	5.88787	7.44934e-05	5.90688	6.9519e-05	5.92688	4.10767e-05	5.92688	0.000123572
5.86988	1.25122e-05	5.86988	0.000108398	5.89787	7.44324e-05	5.91688	6.94885e-05	5.93688	4.10583e-05	5.93688	0.000123485
5.87988	1.25092e-05	5.87988	0.000108429	5.90787	7.44324e-05	5.92688	6.94275e-05	5.94688	4.10797e-05	5.94688	0.000123551
5.88988	1.24939e-05	5.88988	0.000108398	5.91787	7.44019e-05	5.93688	6.9458e-05	5.95688	4.10278e-05	5.95688	0.000123474
5.89988	1.24756e-05	5.89988	0.000108368	5.92787	7.43713e-05	5.94688	6.94275e-05	5.96688	4.10553e-05	5.96688	0.000123529
5.90988	1.24542e-05	5.90988	0.000108368	5.93787	7.43408e-05	5.95688	6.9397e-05	5.97688	4.10004e-05	5.97688	0.000123463
5.91988	1.24176e-05	5.91988	0.000108368	5.94787	7.43103e-05	5.96688	6.93665e-05	5.98688	4.10248e-05	5.98688	0.000123507
5.92988	1.24176e-05	5.92988	0.000108368	5.95787	7.42798e-05	5.97688	6.93665e-05	5.99688	4.09943e-05	5.99688	0.000123441
5.93988	1.24146e-05	5.93988	0.000108337	5.96787	7.42798e-05	5.98688	6.93054e-05	6.00688	4.10095e-05	6.00688	0.000123485
5.94988	1.23901e-05	5.94988	0.000108337	5.97787	7.42493e-05	5.99688	6.93054e-05	6.01688	4.0976e-05	6.01688	0.00012342
5.95988	1.2384e-05	5.95988	0.000108307	5.98787	7.41882e-05	6.00688	6.92444e-05	6.02688	4.09882e-05	6.02688	0.000123441
5.96988	1.23474e-05	5.96988	0.000108307	5.99787	7.41882e-05	6.01688	6.92749e-05	6.03688	4.09637e-05	6.03688	0.000123387
5.97988	1.23383e-05	5.97988	0.000108307	6.00787	7.41577e-05	6.02688	6.91833e-05	6.04688	4.09698e-05	6.04688	0.000123398
5.98988	1.23291e-05	5.98988	0.000108307	6.01787	7.41272e-05	6.03688	6.91833e-05	6.05688	4.0921e-05	6.05688	0.000123343
5.99988	1.22955e-05	5.99988	0.000108307	6.02787	7.41272e-05	6.04688	6.91528e-05	6.06688	4.09332e-05	6.06688	0.000123365
6.00988	1.23016e-05	6.00988	0.000108276	6.03787	7.40662e-05	6.05688	6.91833e-05	6.07688	4.0918e-05	6.07688	0.000123321
6.01988	1.22742e-05	6.01988	0.000108276	6.04787	7.40662e-05	6.06688	6.90918e-05	6.08688	4.0918e-05	6.08688	0.000123332
6.02988	1.22742e-05	6.02988	0.000108246	6.05787	7.40051e-05	6.07688	6.90918e-05	6.09688	4.08997e-05	6.09688	0.00012331
6.03988	1.22467e-05	6.03988	0.000108276	6.06787	7.40051e-05	6.08688	6.90613e-05	6.10688	4.08875e-05	6.10688	0.00012331
6.04988	1.22437e-05	6.04988	0.000108215	6.07787	7.39441e-05	6.09688	6.90613e-05	6.11688	4.08783e-05	6.11688	0.000123278
6.05988	1.22253e-05	6.05988	0.000108246	6.08787	7.39441e-05	6.10688	6.90002e-05	6.12688	4.08539e-05	6.12688	0.000123278
6.06988	1.22101e-05	6.06988	0.000108185	6.09787	7.39441e-05	6.11688	6.90308e-05	6.13688	4.08569e-05	6.13688	0.000123256
6.07988	1.21796e-05	6.07988	0.000108215	6.10787	7.39136e-05	6.12688	6.89697e-05	6.14688	4.08447e-05	6.14688	0.000123245
6.08988	1.21918e-05	6.08988	0.000108215	6.11787	7.38831e-05	6.13688	6.89697e-05	6.15688	4.08417e-05	6.15688	0.000123234
6.09988	1.21552e-05	6.09988	0.000108215	6.12787	7.38525e-05	6.14688	6.89087e-05	6.16688	4.08234e-05	6.16688	0.000123223
6.10988	1.21552e-05	6.10988	0.000108154	6.13787	7.3822e-05	6.15688	6.89087e-05	6.17688	4.08081e-05	6.17688	0.000123223
6.11988	1.21399e-05	6.11988	0.000108154	6.14787	7.3822e-05	6.16688	6.88782e-05	6.18688	4.08051e-05	6.18688	0.000123212
6.12988	1.21155e-05	6.12988	0.000108185	6.15787	7.3761e-05	6.17688	6.88477e-05	6.19688	4.07867e-05	6.19688	0.000123212
6.13988	1.20911e-05	6.13988	0.000108185	6.16787	7.37915e-05	6.18688	6.88171e-05	6.20688	4.07806e-05	6.20688	0.000123179
6.14988	1.21063e-05	6.14988	0.000108154	6.17787	7.37e-05	6.19688	6.88171e-05	6.21688	4.07776e-05	6.21688	0.000123179
6.15988	1.20483e-05	6.15988	0.000108124	6.18787	7.37305e-05	6.20688	6.87866e-05	6.22688	4.07471e-05	6.22688	0.000123125
6.16988	1.20697e-05	6.16988	0.000108124	6.19787	7.36694e-05	6.21688	6.87561e-05	6.23688	4.07532e-05	6.23688	0.000123125
6.17988	1.20361e-05	6.17988	0.000108124	6.20787	7.36694e-05	6.22688	6.86951e-05	6.24688	4.07379e-05	6.24688	0.00012307
6.18988	1.20483e-05	6.18988	0.000108124	6.21787	7.36084e-05	6.23688	6.87256e-05	6.25688	4.07288e-05	6.25688	0.000123092
6.19988	1.20239e-05	6.19988	0.000108124	6.22787	7.36084e-05	6.24688	6.86951e-05	6.26688	4.07166e-05	6.26688	0.000123027
6.20988	1.20239e-05	6.20988	0.000108093	6.23787	7.35779e-05	6.25688	6.86646e-05	6.27688	4.07043e-05	6.27688	0.000123059
6.21988	1.19812e-05	6.21988	0.000108124	6.24787	7.35779e-05	6.26688	6.8634e-05	6.28688	4.0686e-05	6.28688	0.000123005
6.22988	1.19781e-05	6.22988	0.000108063	6.25787	7.35474e-05	6.27688	6.86646e-05	6.29688	4.0683e-05	6.29688	0.000123048
6.23988	1.19537e-05	6.23988	0.000108063	6.26787	7.35474e-05	6.28688	6.86035e-05	6.30688	4.06708e-05	6.30688	0.000122983
6.24988	1.19598e-05	6.24988	0.000108063	6.27787	7.34863e-05	6.29688	6.86035e-05	6.31688	4.06677e-05	6.31688	0.000123048
6.25988	1.19476e-05	6.25988	0.000108032	6.28787	7.34863e-05	6.30688	6.85425e-05	6.32688	4.06494e-05	6.32688	0.000122972
6.26988	1.19354e-05	6.26988	0.000108063	6.29787	7.34558e-05	6.31688	6.8573e-05	6.33688	4.06494e-05	6.33688	0.000123016
6.27988	1.18805e-05	6.27988	0.000108002	6.30787	7.34558e-05	6.32688	6.8512e-05	6.34688	4.06219e-05	6.34688	0.000122939
6.28988	1.18805e-05	6.28988	0.000108032	6.31787	7.33948e-05	6.33688	6.8512e-05	6.35688	4.06342e-05	6.35688	0.000122994
6.29988	1.18835e-05	6.29988	0.000107971	6.32787	7.33948e-05	6.34688	6.84509e-05	6.36688	4.06189e-05	6.36688	0.000122906
6.30988	1.18469e-05	6.30988	0.000108032	6.33787	7.33643e-05	6.35688	6.84509e-05	6.37688	4.06128e-05	6.37688	0.000122983
6.31988	1.18317e-05	6.31988	0.000107971	6.34787	7.33337e-05	6.36688	6.84204e-05	6.38688	4.05945e-05	6.38688	0.000122885
6.32988	1.18713e-05	6.32988	0.000108032	6.35787	7.32727e-05	6.37688	6.83899e-05	6.39688	4.05823e-05	6.39688	0.000122961
6.33988	1.18011e-05	6.33988	0.000107941	6.36787	7.33032e-05	6.38688	6.83899e-05	6.40688	4.05579e-05	6.40688	0.000122863
6.34988	1.18378e-05	6.34988	0.000107971	6.37787	7.32422e-05	6.39688	6.83594e-05	6.41688	4.05731e-05	6.41688	0.000122939
6.35988	1.17798e-05	6.35988	0.000107971	6.38787	7.32727e-05	6.40688	6.83289e-05	6.42688	4.05396e-05	6.42688	0.000122819
6.36988	1.17889e-05	6.36988	0.000107971	6.39787	7.32117e-05	6.41688	6.83289e-05	6.43688	4.05396e-05	6.43688	0.000122917
6.37988	1.17584e-05	6.37988	0.00010791	6.40787	7.32117e-05	6.42688	6.82678e-05	6.44688	4.05243e-05	6.44688	0.000122786
6.38988	1.17706e-05	6.38988	0.000107971	6.41787	7.31506e-05	6.43688	6.82678e-05	6.45688	4.05273e-05	6.45688	0.000122885
6.39988	1.17523e-05	6.39988	0.00010791	6.42787	7.31812e-05	6.44688	6.82373e-05	6.46688	4.05151e-05	6.46688	0.000122764
6.40988	1.17279e-05	6.40988	0.00010791	6.43787	7.31201e-05	6.45688	6.82373e-05	6.47688	4.04999e-05	6.47688	0.000122863
6.41988	1.17065e-05	6.41988	0.00010791	6.44787	7.31201e-05	6.46688	6.82068e-05	6.48688	4.04907e-05	6.48688	0.000122721
6.42988	1.17126e-05	6.42988	0.000107941	6.45787	7.30591e-05	6.47688	6.81763e-05	6.49688	4.04968e-05	6.49688	0.000122841
6.43988	1.16608e-05	6.43988	0.000107849	6.46787	7.30896e-05	6.48688	6.81458e-05	6.50688	4.04724e-05	6.50688	0.000122688
6.44988	1.16913e-05	6.44988	0.00010788	6.47787	7.2998e-05	6.49688	6.81763e-05	6.51688	4.0448e-05	6.51688	0.000122808
6.45988	1.16455e-05	6.45988	0.000107849	6.48787	7.30286e-05	6.50688	6.81152e-05	6.52688	4.04388e-05	6.52688	0.000122666
6.46988	1.16333e-05	6.46988	0.00010788	6.49787	7.29675e-05	6.51688	6.81152e-05	6.53688	4.04358e-05	6.53688	0.000122797
6.47988	1.16302e-05	6.47988	0.000107819	6.50787	7.2998e-05	6.52688	6.80847e-05	6.54688	4.04297e-05	6.54688	0.000122622
6.48988	1.16272e-05	6.48988	0.000107849	6.51787	7.2937e-05	6.53688	6.80542e-05	6.55688	4.04205e-05	6.55688	0.000122775
6.49988	1.15967e-05	6.49988	0.000107819	6.52787	7.29675e-05	6.54688	6.80237e-05	6.56688	4.04114e-05	6.56688	0.000122601
6.50988	1.15967e-05	6.50988	0.000107849	6.53787	7.2876e-05	6.55688	6.80237e-05	6.57688	4.0387e-05	6.57688	0.000122754
6.51988	1.15662e-05	6.51988	0.000107788	6.54787	7.2876e-05	6.56688	6.79932e-05	6.58688	4.03961e-05	6.58688	0.000122579
6.52988	1.15692e-05	6.52988	0.000107849	6.55787	7.28455e-05	6.57688	6.79626e-05	6.59688	4.03687e-05	6.59688	0.000122743
6.53988	1.15479e-05	6.53988	0.000107788	6.56787	7.2876e-05	6.58688	6.79321e-05	6.60688	4.039e-05	6.60688	0.000122546
6.54988	1.15448e-05	6.54988	0.000107788	6.57787	7.27844e-05	6.59688	6.79321e-05	6.61688	4.03503e-05	6.61688	0.000122721
6.55988	1.15356e-05	6.55988	0.000107758	6.58787	7.28149e-05	6.60688	6.79016e-05	6.62688	4.03534e-05	6.62688	0.000122502
6.56988	1.15112e-05	6.56988	0.000107819	6.59787	7.27844e-05	6.61688	6.78711e-05	6.63688	4.0329e-05	6.63688	0.000122688
6.57988	1.15173e-05	6.57988	0.000107758	6.60787	7.27539e-05	6.62688	6.78711e-05	6.64688	4.0329e-05	6.64688	0.000122481
6.58988	1.14899e-05	6.58988	0.000107788	6.61787	7.26929e-05	6.63688	6.78406e-05	6.65688	4.03198e-05	6.65688	0.000122666
6.59988	1.14807e-05	6.59988	0.000107727	6.62787	7.26929e-05	6.64688	6.78101e-05	6.66688	4.03198e-05	6.66688	0.000122426
6.60988	1.14624e-05	6.60988	0.000107758	6.63787	7.26624e-05	6.65688	6.78101e-05	6.67688	4.03015e-05	6.67688	0.000122633
6.61988	1.14655e-05	6.61988	0.000107727	6.64787	7.26624e-05	6.66688	6.77795e-05	6.68688	4.03076e-05	6.68688	0.000122393
6.62988	1.14532e-05	6.62988	0.000107758	6.65787	7.26013e-05	6.67688	6.7749e-05	6.69688	4.02893e-05	6.69688	0.000122612
6.63988	1.14258e-05	6.63988	0.000107697	6.66787	7.26318e-05	6.68688	6.77185e-05	6.70688	4.02893e-05	6.70688	0.000122382
6.64988	1.14349e-05	6.64988	0.000107727	6.67787	7.25708e-05	6.69688	6.77185e-05	6.71688	4.02771e-05	6.71688	0.000122612
6.65988	1.14197e-05	6.65988	0.000107697	6.68787	7.25708e-05	6.70688	6.77185e-05	6.72688	4.02588e-05	6.72688	0.000122371
6.66988	1.14105e-05	6.66988	0.000107697	6.69787	7.25403e-05	6.71688	6.7688e-05	6.73688	4.0271e-05	6.73688	0.000122612
6.67988	1.13922e-05	6.67988	0.000107697	6.70787	7.25403e-05	6.72688	6.76575e-05	6.74688	4.02374e-05	6.74688	0.00012235
6.68988	1.138e-05	6.68988	0.000107727	6.71787	7.24792e-05	6.73688	6.76575e-05	6.75688	4.02405e-05	6.75688	0.00012259
6.69988	1.13586e-05	6.69988	0.000107666	6.72787	7.25098e-05	6.74688	6.7627e-05	6.76688	4.02161e-05	6.76688	0.000122317
6.70988	1.13708e-05	6.70988	0.000107697	6.73787	7.24487e-05	6.75688	6.75964e-05	6.77688	4.02222e-05	6.77688	0.000122568
6.71988	1.13403e-05	6.71988	0.000107666	6.74787	7.24487e-05	6.76688	6.75964e-05	6.78688	4.01917e-05	6.78688	0.000122284
6.72988	1.13342e-05	6.72988	0.000107666	6.75787	7.23877e-05	6.77688	6.75659e-05	6.79688	4.02069e-05	6.79688	0.000122535
6.73988	1.13068e-05	6.73988	0.000107635	6.76787	7.24182e-05	6.78688	6.75354e-05	6.80688	4.01855e-05	6.80688	0.00012224
6.74988	1.13068e-05	6.74988	0.000107697	6.77787	7.23877e-05	6.79688	6.75354e-05	6.81688	4.01855e-05	6.81688	0.000122524
6.75988	1.12823e-05	6.75988	0.000107574	6.78787	7.23877e-05	6.80688	6.75049e-05	6.82688	4.01581e-05	6.82688	0.000122208
6.76988	1.1264e-05	6.76988	0.000107635	6.79787	7.23267e-05	6.81688	6.75049e-05	6.83688	4.01642e-05	6.83688	0.000122491
6.77988	1.12823e-05	6.77988	0.000107605	6.80787	7.23572e-05	6.82688	6.74438e-05	6.84688	4.01581e-05	6.84688	0.000122175
6.78988	1.12488e-05	6.78988	0.000107635	6.81787	7.22961e-05	6.83688	6.74438e-05	6.85688	4.01398e-05	6.85688	0.00012247
6.79988	1.12335e-05	6.79988	0.000107574	6.82787	7.22961e-05	6.84688	6.74438e-05	6.86688	4.01245e-05	6.86688	0.000122142
6.80988	1.12274e-05	6.80988	0.000107635	6.83787	7.22351e-05	6.85688	6.73828e-05	6.87688	4.01184e-05	6.87688	0.000122459
6.81988	1.12305e-05	6.81988	0.000107544	6.84787	7.22656e-05	6.86688	6.73828e-05	6.88688	4.01123e-05	6.88688	0.000122109
6.82988	1.12152e-05	6.82988	0.000107605	6.85787	7.22046e-05	6.87688	6.73523e-05	6.89688	4.01093e-05	6.89688	0.000122448
6.83988	1.11847e-05	6.83988	0.000107544	6.86787	7.22046e-05	6.88688	6.73523e-05	6.90688	4.00848e-05	6.90688	0.000122087
6.84988	1.11786e-05	6.84988	0.000107574	6.87787	7.21436e-05	6.89688	6.73218e-05	6.91688	4.00909e-05	6.91688	0.000122426
6.85988	1.11755e-05	6.85988	0.000107544	6.88787	7.21741e-05	6.90688	6.72913e-05	6.92688	4.00604e-05	6.92688	0.000122055
6.86988	1.11481e-05	6.86988	0.000107544	6.89787	7.2113e-05	6.91688	6.72913e-05	6.93688	4.00604e-05	6.93688	0.000122415
6.87988	1.11603e-05	6.87988	0.000107513	6.90787	7.21436e-05	6.92688	6.72607e-05	6.94688	4.00421e-05	6.94688	0.000122044
6.88988	1.11633e-05	6.88988	0.000107574	6.91787	7.20825e-05	6.93688	6.72302e-05	6.95688	4.00513e-05	6.95688	0.000122415
6.89988	1.1142e-05	6.89988	0.000107513	6.92787	7.20825e-05	6.94688	6.72302e-05	6.96688	4.00299e-05	6.96688	0.000122044
6.90988	1.11023e-05	6.90988	0.000107544	6.93787	7.2052e-05	6.95688	6.71692e-05	6.97688	4.0036e-05	6.97688	0.000122437
6.91988	1.11084e-05	6.91988	0.000107513	6.94787	7.2052e-05	6.96688	6.71997e-05	6.98688	4.00299e-05	6.98688	0.000122055
6.92988	1.10901e-05	6.92988	0.000107483	6.95787	7.1991e-05	6.97688	6.71997e-05	6.99688	4.00177e-05	6.99688	0.000122426
6.93988	1.10962e-05	6.93988	0.000107483	6.96787	7.1991e-05	6.98688	6.71387e-05	7.00688	3.99933e-05	7.00688	0.000122033
6.94988	1.10626e-05	6.94988	0.000107483	6.97787	7.19604e-05	6.99688	6.71692e-05	7.01688	4.00085e-05	7.01688	0.000122393
6.95988	1.10504e-05	6.95988	0.000107483	6.98787	7.19604e-05	7.00688	6.71082e-05	7.02688	3.9975e-05	7.02688	0.000121967
6.96988	1.10413e-05	6.96988	0.000107452	6.99787	7.19299e-05	7.01688	6.71082e-05	7.03688	3.99872e-05	7.03688	0.000122339
6.97988	1.10474e-05	6.97988	0.000107452	7.00787	7.18994e-05	7.02688	6.70776e-05	7.04688	3.99597e-05	7.04688	0.000121924
6.98988	1.10504e-05	6.98988	0.000107513	7.01787	7.18689e-05	7.03688	6.70776e-05	7.05688	3.9978e-05	7.05688	0.000122306
6.99988	1.10168e-05	6.99988	0.000107422	7.02787	7.18689e-05	7.04688	6.70166e-05	7.06688	3.99323e-05	7.06688	0.000121891
7.00988	1.09985e-05	7.00988	0.000107483	7.03787	7.18384e-05	7.05688	6.70471e-05	7.07688	3.99414e-05	7.07688	0.000122295
7.01988	1.10138e-05	7.01988	0.000107422	7.04787	7.18384e-05	7.06688	6.69861e-05	7.08688	3.99353e-05	7.08688	0.00012188
7.02988	1.09955e-05	7.02988	0.000107452	7.05787	7.17773e-05	7.07688	6.70166e-05	7.09688	3.99323e-05	7.09688	0.000122273
7.03988	1.09741e-05	7.03988	0.000107361	7.06787	7.18079e-05	7.08688	6.69556e-05	7.10688	3.99078e-05	7.10688	0.000121836
7.04988	1.09558e-05	7.04988	0.000107422	7.07787	7.17468e-05	7.09688	6.69861e-05	7.11688	3.99139e-05	7.11688	0.000122251
7.05988	1.09558e-05	7.05988	0.000107361	7.08787	7.17468e-05	7.10688	6.68945e-05	7.12688	3.98956e-05	7.12688	0.000121814
7.06988	1.09375e-05	7.06988	0.000107422	7.09787	7.17163e-05	7.11688	6.6925e-05	7.13688	3.98895e-05	7.13688	0.000122218
7.07988	1.09344e-05	7.07988	0.000107361	7.10787	7.17163e-05	7.12688	6.6864e-05	7.14688	3.98712e-05	7.14688	0.000121793
7.08988	1.09039e-05	7.08988	0.000107422	7.11787	7.16858e-05	7.13688	6.68945e-05	7.15688	3.98743e-05	7.15688	0.000122218
7.09988	1.09375e-05	7.09988	0.000107361	7.12787	7.16858e-05	7.14688	6.6864e-05	7.16688	3.98651e-05	7.16688	0.000121771
7.10988	1.08765e-05	7.10988	0.000107391	7.13787	7.16248e-05	7.15688	6.68335e-05	7.17688	3.98407e-05	7.17688	0.000122186
7.11988	1.08887e-05	7.11988	0.00010733	7.14787	7.16553e-05	7.16688	6.68335e-05	7.18688	3.98376e-05	7.18688	0.000121727
7.12988	1.08734e-05	7.12988	0.000107361	7.15787	7.15942e-05	7.17688	6.68335e-05	7.19688	3.98407e-05	7.19688	0.000122142
7.13988	1.08551e-05	7.13988	0.00010733	7.16787	7.15942e-05	7.18688	6.6803e-05	7.20688	3.98285e-05	7.20688	0.000121683
7.14988	1.08551e-05	7.14988	0.000107361	7.17787	7.15332e-05	7.19688	6.6803e-05	7.21688	3.98438e-05	7.21688	0.000122109
7.15988	1.08612e-05	7.15988	0.0001073	7.18787	7.15637e-05	7.20688	6.67114e-05	7.22688	3.98132e-05	7.22688	0.000121651
7.16988	1.08246e-05	7.16988	0.00010733	7.19787	7.15027e-05	7.21688	6.67419e-05	7.23688	3.98163e-05	7.23688	0.000122098
7.17988	1.08398e-05	7.17988	0.0001073	7.20787	7.15332e-05	7.22688	6.67114e-05	7.24688	3.97705e-05	7.24688	0.000121651
7.18988	1.0788e-05	7.18988	0.000107361	7.21787	7.14722e-05	7.23688	6.67114e-05	7.25688	3.9798e-05	7.25688	0.000122087
7.19988	1.08154e-05	7.19988	0.000107269	7.22787	7.15027e-05	7.24688	6.66504e-05	7.26688	3.97766e-05	7.26688	0.000121618
7.20988	1.07788e-05	7.20988	0.000107361	7.23787	7.14417e-05	7.25688	6.66504e-05	7.27688	3.97827e-05	7.27688	0.000122066
7.21988	1.07849e-05	7.21988	0.000107269	7.24787	7.14417e-05	7.26688	6.66504e-05	7.28688	3.97583e-05	7.28688	0.000121596
7.22988	1.07697e-05	7.22988	0.00010733	7.25787	7.14111e-05	7.27688	6.65894e-05	7.29688	3.97644e-05	7.29688	0.000122033
7.23988	1.07788e-05	7.23988	0.000107269	7.26787	7.14111e-05	7.28688	6.65894e-05	7.30688	3.97369e-05	7.30688	0.000121563
7.24988	1.07391e-05	7.24988	0.00010733	7.27787	7.13501e-05	7.29688	6.65894e-05	7.31688	3.97491e-05	7.31688	0.000122011
7.25988	1.07452e-05	7.25988	0.000107269	7.28787	7.13501e-05	7.30688	6.65894e-05	7.32688	3.97308e-05	7.32688	0.000121531
7.26988	1.06964e-05	7.26988	0.000107269	7.29787	7.13501e-05	7.31688	6.65894e-05	7.33688	3.9743e-05	7.33688	0.000121989
7.27988	1.07269e-05	7.27988	0.000107208	7.30787	7.13196e-05	7.32688	6.65588e-05	7.34688	3.97095e-05	7.34688	0.000121509
7.28988	1.07025e-05	7.28988	0.000107269	7.31787	7.12891e-05	7.33688	6.64978e-05	7.35688	3.97156e-05	7.35688	0.000121967
7.29988	1.07056e-05	7.29988	0.000107239	7.32787	7.12891e-05	7.34688	6.65283e-05	7.36688	3.96942e-05	7.36688	0.000121498
7.30988	1.06934e-05	7.30988	0.000107269	7.33787	7.12585e-05	7.35688	6.64673e-05	7.37688	3.97034e-05	7.37688	0.000121967
7.31988	1.0672e-05	7.31988	0.000107208	7.34787	7.12585e-05	7.36688	6.64978e-05	7.38688	3.96698e-05	7.38688	0.000121465
7.32988	1.06659e-05	7.32988	0.000107239	7.35787	7.1228e-05	7.37688	6.64368e-05	7.39688	3.9682e-05	7.39688	0.000121924
7.33988	1.06628e-05	7.33988	0.000107147	7.36787	7.11975e-05	7.38688	6.64673e-05	7.40688	3.96637e-05	7.40688	0.000121432
7.34988	1.06232e-05	7.34988	0.000107239	7.37787	7.11975e-05	7.39688	6.64063e-05	7.41688	3.96576e-05	7.41688	0.000121891
7.35988	1.06445e-05	7.35988	0.000107178	7.38787	7.1167e-05	7.40688	6.64368e-05	7.42688	3.96362e-05	7.42688	0.000121389
7.36988	1.06293e-05	7.36988	0.000107239	7.39787	7.11365e-05	7.41688	6.64063e-05	7.43688	3.96515e-05	7.43688	0.00012188
7.37988	1.06354e-05	7.37988	0.000107147	7.40787	7.11365e-05	7.42688	6.64063e-05	7.44688	3.96271e-05	7.44688	0.000121378
7.38988	1.0611e-05	7.38988	0.000107208	7.41787	7.1106e-05	7.43688	6.63452e-05	7.45688	3.96301e-05	7.45688	0.000121858
7.39988	1.06049e-05	7.39988	0.000107117	7.42787	7.1106e-05	7.44688	6.63452e-05	7.46688	3.96118e-05	7.46688	0.000121345
7.40988	1.05652e-05	7.40988	0.000107178	7.43787	7.10754e-05	7.45688	6.63147e-05	7.47688	3.96088e-05	7.47688	0.000121836
7.41988	1.05988e-05	7.41988	0.000107117	7.44787	7.10754e-05	7.46688	6.63147e-05	7.48688	3.95874e-05	7.48688	0.000121312
7.42988	1.05621e-05	7.42988	0.000107147	7.45787	7.10144e-05	7.47688	6.62842e-05	7.49688	3.96088e-05	7.49688	0.000121814
7.43988	1.05591e-05	7.43988	0.000107086	7.46787	7.10144e-05	7.48688	6.62842e-05	7.50688	3.95844e-05	7.50688	0.00012129
7.44988	1.05316e-05	7.44988	0.000107178	7.47787	7.10144e-05	7.49688	6.62537e-05	7.51688	3.95844e-05	7.51688	0.000121793
7.45988	1.0553e-05	7.45988	0.000107117	7.48787	7.09839e-05	7.50688	6.62231e-05	7.52688	3.95477e-05	7.52688	0.000121258
7.46988	1.05194e-05	7.46988	0.000107147	7.49787	7.09534e-05	7.51688	6.62231e-05	7.53688	3.95691e-05	7.53688	0.000121771
7.47988	1.05286e-05	7.47988	0.000107056	7.50787	7.09229e-05	7.52688	6.61926e-05	7.54688	3.95447e-05	7.54688	0.000121236
7.48988	1.05133e-05	7.48988	0.000107147	7.51787	7.09229e-05	7.53688	6.61926e-05	7.55688	3.95721e-05	7.55688	0.000121749
7.49988	1.05103e-05	7.49988	0.000107056	7.52787	7.09229e-05	7.54688	6.61926e-05	7.56688	3.95325e-05	7.56688	0.000121225
7.50988	1.04828e-05	7.50988	0.000107117	7.53787	7.08618e-05	7.55688	6.61621e-05	7.57688	3.95355e-05	7.57688	0.000121749
7.51988	1.04919e-05	7.51988	0.000107086	7.54787	7.08923e-05	7.56688	6.61621e-05	7.58688	3.9502e-05	7.58688	0.000121203
7.52988	1.04767e-05	7.52988	0.000107086	7.55787	7.08313e-05	7.57688	6.61316e-05	7.59688	3.95233e-05	7.59688	0.000121727
7.53988	1.04797e-05	7.53988	0.000107025	7.56787	7.08313e-05	7.58688	6.61316e-05	7.60688	3.94958e-05	7.60688	0.000121181
7.54988	1.04431e-05	7.54988	0.000107117	7.57787	7.08008e-05	7.59688	6.61011e-05	7.61688	3.95111e-05	7.61688	0.000121705
7.55988	1.04675e-05	7.55988	0.000107086	7.58787	7.08008e-05	7.60688	6.61011e-05	7.62688	3.94745e-05	7.62688	0.000121159
7.56988	1.04218e-05	7.56988	0.000107086	7.59787	7.07703e-05	7.61688	6.604e-05	7.63688	3.94897e-05	7.63688	0.000121673
7.57988	1.04401e-05	7.57988	0.000107086	7.60787	7.07703e-05	7.62688	6.60706e-05	7.64688	3.94623e-05	7.64688	0.000121116
7.58988	1.04218e-05	7.58988	0.000107056	7.61787	7.07397e-05	7.63688	6.60095e-05	7.65688	3.94714e-05	7.65688	0.000121651
7.59988	1.04218e-05	7.59988	0.000107025	7.62787	7.07397e-05	7.64688	6.604e-05	7.66688	3.9444e-05	7.66688	0.000121083
7.60988	1.0379e-05	7.60988	0.000107056	7.63787	7.07092e-05	7.65688	6.5979e-05	7.67688	3.94684e-05	7.67688	0.000121618
7.61988	1.03943e-05	7.61988	0.000107025	7.64787	7.07092e-05	7.66688	6.60095e-05	7.68688	3.94379e-05	7.68688	0.000121061
7.62988	1.03699e-05	7.62988	0.000107056	7.65787	7.06787e-05	7.67688	6.59485e-05	7.69688	3.94409e-05	7.69688	0.000121607
7.63988	1.03973e-05	7.63988	0.000107025	7.66787	7.06787e-05	7.68688	6.59485e-05	7.70688	3.94104e-05	7.70688	0.000121039
7.64988	1.03485e-05	7.64988	0.000106995	7.67787	7.06177e-05	7.69688	6.59485e-05	7.71688	3.94226e-05	7.71688	0.000121596
7.65988	1.0379e-05	7.65988	0.000106995	7.68787	7.06482e-05	7.70688	6.59485e-05	7.72688	3.94012e-05	7.72688	0.000121028
7.66988	1.03455e-05	7.66988	0.000106995	7.69787	7.05872e-05	7.71688	6.58875e-05	7.73688	3.94135e-05	7.73688	0.000121585
7.67988	1.03455e-05	7.67988	0.000106964	7.70787	7.05872e-05	7.72688	6.5918e-05	7.74688	3.93768e-05	7.74688	0.000121017
7.68988	1.03088e-05	7.68988	0.000106964	7.71787	7.05872e-05	7.73688	6.58569e-05	7.75688	3.93982e-05	7.75688	0.000121563
7.69988	1.03394e-05	7.69988	0.000106964	7.72787	7.05566e-05	7.74688	6.58875e-05	7.76688	3.93707e-05	7.76688	0.000120985
7.70988	1.03149e-05	7.70988	0.000106995	7.73787	7.05566e-05	7.75688	6.57959e-05	7.77688	3.93707e-05	7.77688	0.000121541
7.71988	1.03241e-05	7.71988	0.000106934	7.74787	7.05261e-05	7.76688	6.58569e-05	7.78688	3.93555e-05	7.78688	0.000120963
7.72988	1.02753e-05	7.72988	0.000106964	7.75787	7.04956e-05	7.77688	6.57959e-05	7.79688	3.93738e-05	7.79688	0.000121498
7.73988	1.02997e-05	7.73988	0.000106934	7.76787	7.04651e-05	7.78688	6.58264e-05	7.80688	3.93433e-05	7.80688	0.00012093
7.74988	1.02783e-05	7.74988	0.000106964	7.77787	7.04651e-05	7.79688	6.57654e-05	7.81688	3.93463e-05	7.81688	0.000121476
7.75988	1.02905e-05	7.75988	0.000106934	7.78787	7.04651e-05	7.80688	6.57959e-05	7.82688	3.93311e-05	7.82688	0.000120886
7.76988	1.0257e-05	7.76988	0.000106934	7.79787	7.04346e-05	7.81688	6.57349e-05	7.83688	3.93341e-05	7.83688	0.000121432
7.77988	1.026e-05	7.77988	0.000106903	7.80787	7.04346e-05	7.82688	6.57349e-05	7.84688	3.93158e-05	7.84688	0.000120854
7.78988	1.02173e-05	7.78988	0.000106934	7.81787	7.04041e-05	7.83688	6.57043e-05	7.85688	3.93341e-05	7.85688	0.0001214
7.79988	1.02509e-05	7.79988	0.000106873	7.82787	7.03735e-05	7.84688	6.57043e-05	7.86688	3.92914e-05	7.86688	0.000120821
7.80988	1.02051e-05	7.80988	0.000106903	7.83787	7.0343e-05	7.85688	6.56738e-05	7.87688	3.9325e-05	7.87688	0.000121367
7.81988	1.02142e-05	7.81988	0.000106873	7.84787	7.03735e-05	7.86688	6.57043e-05	7.88688	3.92792e-05	7.88688	0.000120788
7.82988	1.01715e-05	7.82988	0.000106903	7.85787	7.03125e-05	7.87688	6.56433e-05	7.89688	3.92853e-05	7.89688	0.000121345
7.83988	1.0202e-05	7.83988	0.000106842	7.86787	7.03125e-05	7.88688	6.56433e-05	7.90688	3.92731e-05	7.90688	0.000120766
7.84988	1.01746e-05	7.84988	0.000106903	7.87787	7.0282e-05	7.89688	6.56128e-05	7.91688	3.92822e-05	7.91688	0.000121323
7.85988	1.01837e-05	7.85988	0.000106842	7.88787	7.0282e-05	7.90688	6.56128e-05	7.92688	3.92639e-05	7.92688	0.000120755
7.86988	1.01501e-05	7.86988	0.000106903	7.89787	7.0282e-05	7.91688	6.56128e-05	7.93688	3.92761e-05	7.93688	0.000121312
7.87988	1.01318e-05	7.87988	0.000106812	7.90787	7.02515e-05	7.92688	6.56128e-05	7.94688	3.92365e-05	7.94688	0.000120733
7.88988	1.01654e-05	7.88988	0.000106873	7.91787	7.02209e-05	7.93688	6.55823e-05	7.95688	3.92426e-05	7.95688	0.00012129
7.89988	1.01471e-05	7.89988	0.000106842	7.92787	7.02209e-05	7.94688	6.55518e-05	7.96688	3.92334e-05	7.96688	0.000120712
7.90988	1.01074e-05	7.90988	0.000106842	7.93787	7.02209e-05	7.95688	6.55518e-05	7.97688	3.92395e-05	7.97688	0.000121258
7.91988	1.01318e-05	7.91988	0.000106812	7.94787	7.01904e-05	7.96688	6.55212e-05	7.98688	3.92151e-05	7.98688	0.000120679
7.92988	1.01074e-05	7.92988	0.000106873	7.95787	7.01599e-05	7.97688	6.54907e-05	7.99688	3.92212e-05	7.99688	0.000121236
7.93988	1.01105e-05	7.93988	0.000106812	7.96787	7.01294e-05	7.98688	6.55212e-05	8.00688	3.92059e-05	8.00688	0.000120657
7.94988	1.00952e-05	7.94988	0.000106842	7.97787	7.01294e-05	7.99688	6.54907e-05	8.01688	3.9209e-05	8.01688	0.000121214
7.95988	1.00891e-05	7.95988	0.000106781	7.98787	7.00989e-05	8.00688	6.54907e-05	8.02688	3.91785e-05	8.02688	0.000120624
7.96988	1.00739e-05	7.96988	0.000106842	7.99787	7.00989e-05	8.01688	6.54602e-05	8.03688	3.91937e-05	8.03688	0.000121192
7.97988	1.01074e-05	7.97988	0.00010675	8.00787	7.00684e-05	8.02688	6.54297e-05	8.04688	3.91602e-05	8.04688	0.000120602
7.98988	1.00494e-05	7.98988	0.000106812	8.01787	7.00684e-05	8.03688	6.54297e-05	8.05688	3.91663e-05	8.05688	0.000121159
7.99988	1.00647e-05	7.99988	0.00010675	8.02787	7.00073e-05	8.04688	6.53992e-05	8.06688	3.91541e-05	8.06688	0.000120559
8.00988	1.00555e-05	8.00988	0.000106812	8.03787	7.00073e-05	8.05688	6.54297e-05	8.07688	3.91602e-05	8.07688	0.000121137
8.01988	1.00525e-05	8.01988	0.000106781	8.04787	7.00073e-05	8.06688	6.53687e-05	8.08688	3.91449e-05	8.08688	0.000120548
8.02988	1.00128e-05	8.02988	0.000106781	8.05787	7.00073e-05	8.07688	6.53687e-05	8.09688	3.9151e-05	8.09688	0.000121137
8.03988	1.00372e-05	8.03988	0.00010672	8.06787	6.99463e-05	8.08688	6.53381e-05	8.10688	3.91174e-05	8.10688	0.000120548
8.04988	9.97925e-06	8.04988	0.00010675	8.07787	6.99768e-05	8.09688	6.53381e-05	8.11688	3.91296e-05	8.11688	0.000121137
8.05988	1.0022e-05	8.05988	0.00010675	8.08787	6.99463e-05	8.10688	6.53381e-05	8.12688	3.91052e-05	8.12688	0.000120548
8.06988	9.99756e-06	8.06988	0.00010675	8.09787	6.99158e-05	8.11688	6.53076e-05	8.13688	3.91083e-05	8.13688	0.000121137
8.07988	1.00067e-05	8.07988	0.00010672	8.10787	6.99158e-05	8.12688	6.53076e-05	8.14688	3.91052e-05	8.14688	0.000120526
8.08988	9.95789e-06	8.08988	0.000106689	8.11787	6.98853e-05	8.13688	6.53076e-05	8.15688	3.90991e-05	8.15688	0.000121116
8.09988	1.00006e-05	8.09988	0.00010672	8.12787	6.98547e-05	8.14688	6.52771e-05	8.16688	3.90717e-05	8.16688	0.000120504
8.10988	9.94568e-06	8.10988	0.000106689	8.13787	6.98547e-05	8.15688	6.52466e-05	8.17688	3.90717e-05	8.17688	0.000121072
8.11988	9.95789e-06	8.11988	0.000106689	8.14787	6.98547e-05	8.16688	6.52771e-05	8.18688	3.90625e-05	8.18688	0.00012045
8.12988	9.94263e-06	8.12988	0.00010672	8.15787	6.98242e-05	8.17688	6.52161e-05	8.19688	3.90656e-05	8.19688	0.000121028
8.13988	9.96094e-06	8.13988	0.000106689	8.16787	6.98242e-05	8.18688	6.52466e-05	8.20688	3.90472e-05	8.20688	0.000120417
8.14988	9.94263e-06	8.14988	0.00010672	8.17787	6.97937e-05	8.19688	6.51855e-05	8.21688	3.90594e-05	8.21688	0.000120996
8.15988	9.93347e-06	8.15988	0.00010672	8.18787	6.97632e-05	8.20688	6.51855e-05	8.22688	3.90381e-05	8.22688	0.000120406
8.16988	9.90601e-06	8.16988	0.00010672	8.19787	6.97937e-05	8.21688	6.5155e-05	8.23688	3.90503e-05	8.23688	0.000120985
8.17988	9.90295e-06	8.17988	0.000106689	8.20787	6.97327e-05	8.22688	6.5155e-05	8.24688	3.90442e-05	8.24688	0.000120373
8.18988	9.87244e-06	8.18988	0.000106689	8.21787	6.97327e-05	8.23688	6.51245e-05	8.25688	3.90289e-05	8.25688	0.000120941
8.19988	9.8938e-06	8.19988	0.000106659	8.22787	6.97327e-05	8.24688	6.5155e-05	8.26688	3.90015e-05	8.26688	0.00012034
8.20988	9.87244e-06	8.20988	0.000106659	8.23787	6.97021e-05	8.25688	6.5094e-05	8.27688	3.90045e-05	8.27688	0.000120908
8.21988	9.88464e-06	8.21988	0.000106659	8.24787	6.96716e-05	8.26688	6.51245e-05	8.28688	3.90015e-05	8.28688	0.000120308
8.22988	9.84802e-06	8.22988	0.000106628	8.25787	6.96716e-05	8.27688	6.50635e-05	8.29688	3.89862e-05	8.29688	0.000120886
8.23988	9.87549e-06	8.23988	0.000106628	8.26787	6.96411e-05	8.28688	6.5094e-05	8.30688	3.89801e-05	8.30688	0.000120286
8.24988	9.83887e-06	8.24988	0.000106628	8.27787	6.96411e-05	8.29688	6.5033e-05	8.31688	3.89923e-05	8.31688	0.000120865
8.25988	9.86633e-06	8.25988	0.000106659	8.28787	6.96106e-05	8.30688	6.50635e-05	8.32688	3.89801e-05	8.32688	0.000120264
8.26988	9.82666e-06	8.26988	0.000106598	8.29787	6.96106e-05	8.31688	6.5033e-05	8.33688	3.89618e-05	8.33688	0.000120832
8.27988	9.84192e-06	8.27988	0.000106628	8.30787	6.95801e-05	8.32688	6.5033e-05	8.34688	3.89557e-05	8.34688	0.000120231
8.28988	9.79919e-06	8.28988	0.000106598	8.31787	6.95801e-05	8.33688	6.50024e-05	8.35688	3.89557e-05	8.35688	0.00012081
8.29988	9.82666e-06	8.29988	0.000106628	8.32787	6.95496e-05	8.34688	6.5033e-05	8.36688	3.89496e-05	8.36688	0.00012022
8.30988	9.79004e-06	8.30988	0.000106628	8.33787	6.95496e-05	8.35688	6.49719e-05	8.37688	3.89374e-05	8.37688	0.000120788
8.31988	9.79614e-06	8.31988	0.000106628	8.34787	6.9519e-05	8.36688	6.49719e-05	8.38688	3.89252e-05	8.38688	0.000120209
8.32988	9.79004e-06	8.32988	0.000106567	8.35787	6.9519e-05	8.37688	6.49109e-05	8.39688	3.89374e-05	8.39688	0.000120777
8.33988	9.81445e-06	8.33988	0.000106598	8.36787	6.94885e-05	8.38688	6.49414e-05	8.40688	3.8916e-05	8.40688	0.000120188
8.34988	9.77173e-06	8.34988	0.000106567	8.37787	6.9519e-05	8.39688	6.49414e-05	8.41688	3.89008e-05	8.41688	0.000120733
8.35988	9.76868e-06	8.35988	0.000106567	8.38787	6.9458e-05	8.40688	6.49414e-05	8.42688	3.88977e-05	8.42688	0.000120144
8.36988	9.75342e-06	8.36988	0.000106567	8.39787	6.9458e-05	8.41688	6.48804e-05	8.43688	3.8913e-05	8.43688	0.00012069
8.37988	9.76563e-06	8.37988	0.000106567	8.40787	6.9397e-05	8.42688	6.49109e-05	8.44688	3.88794e-05	8.44688	0.000120111
8.38988	9.74731e-06	8.38988	0.000106537	8.41787	6.94275e-05	8.43688	6.48499e-05	8.45688	3.89008e-05	8.45688	0.000120657
8.39988	9.74121e-06	8.39988	0.000106567	8.42787	6.9397e-05	8.44688	6.48804e-05	8.46688	3.88641e-05	8.46688	0.0001201
8.40988	9.729e-06	8.40988	0.000106537	8.43787	6.9397e-05	8.45688	6.48193e-05	8.47688	3.88763e-05	8.47688	0.000120657
8.41988	9.72595e-06	8.41988	0.000106537	8.44787	6.93665e-05	8.46688	6.48499e-05	8.48688	3.88519e-05	8.48688	0.000120078
8.42988	9.71069e-06	8.42988	0.000106537	8.45787	6.93665e-05	8.47688	6.48193e-05	8.49688	3.88733e-05	8.49688	0.000120624
8.43988	9.73206e-06	8.43988	0.000106537	8.46787	6.93359e-05	8.48688	6.48193e-05	8.50688	3.88367e-05	8.50688	0.000120056
8.44988	9.68323e-06	8.44988	0.000106506	8.47787	6.93359e-05	8.49688	6.47888e-05	8.51688	3.88519e-05	8.51688	0.000120581
8.45988	9.71069e-06	8.45988	0.000106506	8.48787	6.93054e-05	8.50688	6.47888e-05	8.52688	3.88245e-05	8.52688	0.000120013
8.46988	9.68933e-06	8.46988	0.000106506	8.49787	6.93054e-05	8.51688	6.47583e-05	8.53688	3.88336e-05	8.53688	0.000120559
8.47988	9.68933e-06	8.47988	0.000106506	8.50787	6.92444e-05	8.52688	6.47583e-05	8.54688	3.88092e-05	8.54688	0.000120002
8.48988	9.6405e-06	8.48988	0.000106476	8.51787	6.93054e-05	8.53688	6.47278e-05	8.55688	3.88306e-05	8.55688	0.000120537
8.49988	9.67102e-06	8.49988	0.000106506	8.52787	6.92444e-05	8.54688	6.47278e-05	8.56688	3.87939e-05	8.56688	0.000119991
8.50988	9.64661e-06	8.50988	0.000106476	8.53787	6.92749e-05	8.55688	6.46973e-05	8.57688	3.88184e-05	8.57688	0.000120515
8.51988	9.67407e-06	8.51988	0.000106476	8.54787	6.91833e-05	8.56688	6.47278e-05	8.58688	3.87817e-05	8.58688	0.000119958
8.52988	9.65881e-06	8.52988	0.000106476	8.55787	6.92139e-05	8.57688	6.46667e-05	8.59688	3.88123e-05	8.59688	0.000120482
8.53988	9.63745e-06	8.53988	0.000106476	8.56787	6.91528e-05	8.58688	6.47278e-05	8.60688	3.87695e-05	8.60688	0.000119947
8.54988	9.62524e-06	8.54988	0.000106476	8.57787	6.91833e-05	8.59688	6.46667e-05	8.61688	3.87848e-05	8.61688	0.00012045
8.55988	9.63135e-06	8.55988	0.000106476	8.58787	6.91528e-05	8.60688	6.46667e-05	8.62688	3.87634e-05	8.62688	0.000119915
8.56988	9.61304e-06	8.56988	0.000106445	8.59787	6.91528e-05	8.61688	6.46362e-05	8.63688	3.87604e-05	8.63688	0.000120428
8.57988	9.62219e-06	8.57988	0.000106445	8.60787	6.91223e-05	8.62688	6.46667e-05	8.64688	3.87573e-05	8.64688	0.000119893
8.58988	9.57947e-06	8.58988	0.000106445	8.61787	6.91223e-05	8.63688	6.46057e-05	8.65688	3.87604e-05	8.65688	0.000120384
8.59988	9.60083e-06	8.59988	0.000106445	8.62787	6.90613e-05	8.64688	6.46362e-05	8.66688	3.8736e-05	8.66688	0.000119871
8.60988	9.58557e-06	8.60988	0.000106445	8.63787	6.90918e-05	8.65688	6.45752e-05	8.67688	3.87482e-05	8.67688	0.000120373
8.61988	9.58252e-06	8.61988	0.000106415	8.64787	6.90613e-05	8.66688	6.46057e-05	8.68688	3.87177e-05	8.68688	0.00011986
8.62988	9.55811e-06	8.62988	0.000106415	8.65787	6.90918e-05	8.67688	6.45447e-05	8.69688	3.87115e-05	8.69688	0.000120351
8.63988	9.56726e-06	8.63988	0.000106415	8.66787	6.90002e-05	8.68688	6.45752e-05	8.70688	3.87207e-05	8.70688	0.000119849
8.64988	9.55811e-06	8.64988	0.000106384	8.67787	6.90308e-05	8.69688	6.45142e-05	8.71688	3.87238e-05	8.71688	0.000120329
8.65988	9.56421e-06	8.65988	0.000106415	8.68787	6.90002e-05	8.70688	6.45447e-05	8.72688	3.86993e-05	8.72688	0.000119816
8.66988	9.56116e-06	8.66988	0.000106384	8.69787	6.90308e-05	8.71688	6.44836e-05	8.73688	3.86902e-05	8.73688	0.000120308
8.67988	9.53369e-06	8.67988	0.000106415	8.70787	6.89697e-05	8.72688	6.45447e-05	8.74688	3.86871e-05	8.74688	0.000119805
8.68988	9.51843e-06	8.68988	0.000106354	8.71787	6.89697e-05	8.73688	6.44836e-05	8.75688	3.8681e-05	8.75688	0.000120275
8.69988	9.53674e-06	8.69988	0.000106384	8.72787	6.89392e-05	8.74688	6.45142e-05	8.76688	3.86963e-05	8.76688	0.000119773
8.70988	9.49707e-06	8.70988	0.000106354	8.73787	6.89697e-05	8.75688	6.44531e-05	8.77688	3.86749e-05	8.77688	0.000120242
8.71988	9.53674e-06	8.71988	0.000106415	8.74787	6.89087e-05	8.76688	6.44836e-05	8.78688	3.86658e-05	8.78688	0.000119729
8.72988	9.47876e-06	8.72988	0.000106354	8.75787	6.89087e-05	8.77688	6.44226e-05	8.79688	3.86597e-05	8.79688	0.000120198
8.73988	9.50928e-06	8.73988	0.000106384	8.76787	6.88782e-05	8.78688	6.44531e-05	8.80688	3.86536e-05	8.80688	0.000119696
8.74988	9.50012e-06	8.74988	0.000106354	8.77787	6.89087e-05	8.79688	6.43921e-05	8.81688	3.86505e-05	8.81688	0.000120166
8.75988	9.49402e-06	8.75988	0.000106354	8.78787	6.88477e-05	8.80688	6.44226e-05	8.82688	3.86444e-05	8.82688	0.000119685
8.76988	9.44214e-06	8.76988	0.000106354	8.79787	6.88782e-05	8.81688	6.43616e-05	8.83688	3.86383e-05	8.83688	0.000120155
8.77988	9.48792e-06	8.77988	0.000106354	8.80787	6.88171e-05	8.82688	6.44226e-05	8.84688	3.862e-05	8.84688	0.000119674
8.78988	9.43909e-06	8.78988	0.000106354	8.81787	6.88477e-05	8.83688	6.43311e-05	8.85688	3.86322e-05	8.85688	0.000120133
8.79988	9.4696e-06	8.79988	0.000106323	8.82787	6.87866e-05	8.84688	6.43921e-05	8.86688	3.86139e-05	8.86688	0.000119652
8.80988	9.44824e-06	8.80988	0.000106293	8.83787	6.87866e-05	8.85688	6.43311e-05	8.87688	3.86078e-05	8.87688	0.0001201
8.81988	9.45435e-06	8.81988	0.000106354	8.84787	6.87256e-05	8.86688	6.43616e-05	8.88688	3.86139e-05	8.88688	0.00011962
8.82988	9.41772e-06	8.82988	0.000106293	8.85787	6.87866e-05	8.87688	6.43311e-05	8.89688	3.86078e-05	8.89688	0.000120056
8.83988	9.43298e-06	8.83988	0.000106354	8.86787	6.87256e-05	8.88688	6.43311e-05	8.90688	3.86047e-05	8.90688	0.000119587
8.84988	9.41162e-06	8.84988	0.000106293	8.87787	6.87561e-05	8.89688	6.42395e-05	8.91688	3.85925e-05	8.91688	0.000120024
8.85988	9.42993e-06	8.85988	0.000106293	8.88787	6.86951e-05	8.90688	6.43005e-05	8.92688	3.85834e-05	8.92688	0.000119554
8.86988	9.37805e-06	8.86988	0.000106293	8.89787	6.87256e-05	8.91688	6.427e-05	8.93688	3.85742e-05	8.93688	0.00011998
8.87988	9.38721e-06	8.87988	0.000106293	8.90787	6.86951e-05	8.92688	6.427e-05	8.94688	3.8559e-05	8.94688	0.000119521
8.88988	9.41772e-06	8.88988	0.000106293	8.91787	6.86951e-05	8.93688	6.42395e-05	8.95688	3.8559e-05	8.95688	0.000119958
8.89988	9.36584e-06	8.89988	0.000106293	8.92787	6.8634e-05	8.94688	6.42395e-05	8.96688	3.85529e-05	8.96688	0.000119511
8.90988	9.375e-06	8.90988	0.000106293	8.93787	6.8634e-05	8.95688	6.4209e-05	8.97688	3.85406e-05	8.97688	0.000119936
8.91988	9.375e-06	8.91988	0.000106293	8.94787	6.86035e-05	8.96688	6.42395e-05	8.98688	3.85437e-05	8.98688	0.000119489
8.92988	9.36279e-06	8.92988	0.000106262	8.95787	6.8634e-05	8.97688	6.41479e-05	8.99688	3.85254e-05	8.99688	0.000119904
8.93988	9.35669e-06	8.93988	0.000106262	8.96787	6.8573e-05	8.98688	6.4209e-05	9.00688	3.85437e-05	9.00688	0.000119456
8.94988	9.34143e-06	8.94988	0.000106262	8.97787	6.86035e-05	8.99688	6.41479e-05	9.01688	3.85101e-05	9.01688	0.00011986
8.95988	9.33838e-06	8.95988	0.000106293	8.98787	6.85425e-05	9.00688	6.4209e-05	9.02688	3.85162e-05	9.02688	0.000119423
8.96988	9.33838e-06	8.96988	0.000106232	8.99787	6.8573e-05	9.01688	6.41479e-05	9.03688	3.85071e-05	9.03688	0.000119838
8.97988	9.33228e-06	8.97988	0.000106262	9.00787	6.85425e-05	9.02688	6.41785e-05	9.04688	3.85223e-05	9.04688	0.000119412
8.98988	9.32617e-06	8.98988	0.000106262	9.01787	6.8573e-05	9.03688	6.41174e-05	9.05688	3.8504e-05	9.05688	0.000119805
8.99988	9.32312e-06	8.99988	0.000106293	9.02787	6.8512e-05	9.04688	6.41479e-05	9.06688	3.8504e-05	9.06688	0.000119379
9.00988	9.31091e-06	9.00988	0.000106232	9.03787	6.8512e-05	9.05688	6.40869e-05	9.07688	3.84918e-05	9.07688	0.000119773
9.01988	9.31702e-06	9.01988	0.000106201	9.04787	6.84509e-05	9.06688	6.41174e-05	9.08688	3.84827e-05	9.08688	0.000119358
9.02988	9.2804e-06	9.02988	0.000106201	9.05787	6.8512e-05	9.07688	6.40869e-05	9.09688	3.84766e-05	9.09688	0.00011974
9.03988	9.30481e-06	9.03988	0.000106232	9.06787	6.84509e-05	9.08688	6.40869e-05	9.10688	3.84705e-05	9.10688	0.000119336
9.04988	9.27734e-06	9.04988	0.000106201	9.07787	6.84509e-05	9.09688	6.40564e-05	9.11688	3.84674e-05	9.11688	0.000119718
9.05988	9.31091e-06	9.05988	0.000106232	9.08787	6.83899e-05	9.10688	6.40869e-05	9.12688	3.84552e-05	9.12688	0.000119314
9.06988	9.24683e-06	9.06988	0.000106201	9.09787	6.84204e-05	9.11688	6.40259e-05	9.13688	3.84583e-05	9.13688	0.000119674
9.07988	9.27734e-06	9.07988	0.000106232	9.10787	6.83899e-05	9.12688	6.40564e-05	9.14688	3.84613e-05	9.14688	0.000119259
9.08988	9.24072e-06	9.08988	0.000106171	9.11787	6.84204e-05	9.13688	6.39648e-05	9.15688	3.84369e-05	9.15688	0.00011962
9.09988	9.27429e-06	9.09988	0.000106232	9.12787	6.83594e-05	9.14688	6.40259e-05	9.16688	3.84399e-05	9.16688	0.000119238
9.10988	9.23462e-06	9.10988	0.000106171	9.13787	6.83594e-05	9.15688	6.39954e-05	9.17688	3.84247e-05	9.17688	0.000119598
9.11988	9.25903e-06	9.11988	0.000106201	9.14787	6.83594e-05	9.16688	6.40259e-05	9.18688	3.84094e-05	9.18688	0.000119216
9.12988	9.21936e-06	9.12988	0.00010611	9.15787	6.83594e-05	9.17688	6.39648e-05	9.19688	3.84186e-05	9.19688	0.000119598
9.13988	9.23767e-06	9.13988	0.000106201	9.16787	6.83289e-05	9.18688	6.39954e-05	9.20688	3.84094e-05	9.20688	0.000119227
9.14988	9.22241e-06	9.14988	0.00010614	9.17787	6.83289e-05	9.19688	6.39343e-05	9.21688	3.84033e-05	9.21688	0.000119565
9.15988	9.23767e-06	9.15988	0.000106201	9.18787	6.82678e-05	9.20688	6.39954e-05	9.22688	3.83911e-05	9.22688	0.000119205
9.16988	9.19495e-06	9.16988	0.00010614	9.19787	6.82983e-05	9.21688	6.39343e-05	9.23688	3.8385e-05	9.23688	0.000119543
9.17988	9.24072e-06	9.17988	0.000106201	9.20787	6.82678e-05	9.22688	6.39343e-05	9.24688	3.83759e-05	9.24688	0.000119172
9.18988	9.17969e-06	9.18988	0.00010614	9.21787	6.82678e-05	9.23688	6.39038e-05	9.25688	3.83759e-05	9.25688	0.000119521
9.19988	9.2041e-06	9.19988	0.000106171	9.22787	6.82373e-05	9.24688	6.39343e-05	9.26688	3.83636e-05	9.26688	0.000119172
9.20988	9.17969e-06	9.20988	0.00010611	9.23787	6.82068e-05	9.25688	6.38428e-05	9.27688	3.83698e-05	9.27688	0.0001195
9.21988	9.21326e-06	9.21988	0.00010614	9.24787	6.82068e-05	9.26688	6.39038e-05	9.28688	3.83606e-05	9.28688	0.000119161
9.22988	9.15833e-06	9.22988	0.00010611	9.25787	6.82373e-05	9.27688	6.38733e-05	9.29688	3.83575e-05	9.29688	0.000119478
9.23988	9.17969e-06	9.23988	0.00010614	9.26787	6.82068e-05	9.28688	6.39038e-05	9.30688	3.83514e-05	9.30688	0.000119107
9.24988	9.16748e-06	9.24988	0.00010611	9.27787	6.81763e-05	9.29688	6.38428e-05	9.31688	3.83331e-05	9.31688	0.000119412
9.25988	9.16138e-06	9.25988	0.00010611	9.28787	6.81458e-05	9.30688	6.38428e-05	9.32688	3.83392e-05	9.32688	0.000119074
9.26988	9.13086e-06	9.26988	0.000106079	9.29787	6.81458e-05	9.31688	6.38123e-05	9.33688	3.8327e-05	9.33688	0.000119379
9.27988	9.15833e-06	9.27988	0.00010614	9.30787	6.81152e-05	9.32688	6.37817e-05	9.34688	3.83301e-05	9.34688	0.000119052
9.28988	9.13696e-06	9.28988	0.000106079	9.31787	6.81458e-05	9.33688	6.38123e-05	9.35688	3.83087e-05	9.35688	0.000119358
9.29988	9.15222e-06	9.29988	0.00010611	9.32787	6.80847e-05	9.34688	6.38428e-05	9.36688	3.83148e-05	9.36688	0.000119052
9.30988	9.09119e-06	9.30988	0.000106049	9.33787	6.81152e-05	9.35688	6.37817e-05	9.37688	3.82996e-05	9.37688	0.000119336
9.31988	9.15833e-06	9.31988	0.00010611	9.34787	6.80542e-05	9.36688	6.38123e-05	9.38688	3.83057e-05	9.38688	0.00011903
9.32988	9.08508e-06	9.32988	0.000106049	9.35787	6.80847e-05	9.37688	6.37512e-05	9.39688	3.82965e-05	9.39688	0.000119314
9.33988	9.11865e-06	9.33988	0.00010611	9.36787	6.80542e-05	9.38688	6.37512e-05	9.40688	3.83057e-05	9.40688	0.00011903
9.34988	9.08203e-06	9.34988	0.000106049	9.37787	6.80237e-05	9.39688	6.37207e-05	9.41688	3.82721e-05	9.41688	0.000119292
9.35988	9.11255e-06	9.35988	0.000106079	9.38787	6.80542e-05	9.40688	6.37207e-05	9.42688	3.82904e-05	9.42688	0.000118997
9.36988	9.07288e-06	9.36988	0.000106049	9.39787	6.80237e-05	9.41688	6.36902e-05	9.43688	3.82721e-05	9.43688	0.000119248
9.37988	9.11865e-06	9.37988	0.00010611	9.40787	6.79932e-05	9.42688	6.37512e-05	9.44688	3.8269e-05	9.44688	0.000118975
9.38988	9.06677e-06	9.38988	0.000106018	9.41787	6.79932e-05	9.43688	6.36597e-05	9.45688	3.82446e-05	9.45688	0.000119216
9.39988	9.08203e-06	9.39988	0.000106079	9.42787	6.79626e-05	9.44688	6.36902e-05	9.46688	3.82629e-05	9.46688	0.000118954
9.40988	9.04541e-06	9.40988	0.000105988	9.43787	6.79626e-05	9.45688	6.36597e-05	9.47688	3.82416e-05	9.47688	0.000119205
9.41988	9.06067e-06	9.41988	0.000106079	9.44787	6.79321e-05	9.46688	6.36902e-05	9.48688	3.82477e-05	9.48688	0.000118943
9.42988	9.04846e-06	9.42988	0.000106018	9.45787	6.79626e-05	9.47688	6.36292e-05	9.49688	3.82263e-05	9.49688	0.000119161
9.43988	9.07898e-06	9.43988	0.000106018	9.46787	6.79016e-05	9.48688	6.36597e-05	9.50688	3.82385e-05	9.50688	0.00011891
9.44988	9.04236e-06	9.44988	0.000105988	9.47787	6.79321e-05	9.49688	6.35986e-05	9.51688	3.8205e-05	9.51688	0.000119117
9.45988	9.05457e-06	9.45988	0.000106049	9.48787	6.79016e-05	9.50688	6.36292e-05	9.52688	3.82385e-05	9.52688	0.000118866
9.46988	9.03625e-06	9.46988	0.000105988	9.49787	6.79016e-05	9.51688	6.35986e-05	9.53688	3.81958e-05	9.53688	0.000119074
9.47988	9.0271e-06	9.47988	0.000106018	9.50787	6.78406e-05	9.52688	6.36292e-05	9.54688	3.82141e-05	9.54688	0.000118855
9.48988	9.00879e-06	9.48988	0.000105957	9.51787	6.78711e-05	9.53688	6.35681e-05	9.55688	3.81897e-05	9.55688	0.000119041
9.49988	9.03015e-06	9.49988	0.000106079	9.52787	6.78101e-05	9.54688	6.35986e-05	9.56688	3.81958e-05	9.56688	0.000118834
9.50988	8.99963e-06	9.50988	0.000106018	9.53787	6.78406e-05	9.55688	6.35681e-05	9.57688	3.81866e-05	9.57688	0.000119019
9.51988	9.00269e-06	9.51988	0.000106018	9.54787	6.77795e-05	9.56688	6.35681e-05	9.58688	3.81927e-05	9.58688	0.000118823
9.52988	8.99353e-06	9.52988	0.000105988	9.55787	6.78101e-05	9.57688	6.35071e-05	9.59688	3.81653e-05	9.59688	0.000118986
9.53988	8.98438e-06	9.53988	0.000105988	9.56787	6.7749e-05	9.58688	6.35681e-05	9.60688	3.81775e-05	9.60688	0.000118812
9.54988	8.95996e-06	9.54988	0.000105957	9.57787	6.78101e-05	9.59688	6.35071e-05	9.61688	3.81592e-05	9.61688	0.000118954
9.55988	8.99658e-06	9.55988	0.000105988	9.58787	6.7749e-05	9.60688	6.35376e-05	9.62688	3.81805e-05	9.62688	0.000118779
9.56988	8.96606e-06	9.56988	0.000105957	9.59787	6.77795e-05	9.61688	6.35071e-05	9.63688	3.8147e-05	9.63688	0.000118921
9.57988	8.97827e-06	9.57988	0.000106018	9.60787	6.7749e-05	9.62688	6.35071e-05	9.64688	3.81561e-05	9.64688	0.000118757
9.58988	8.96912e-06	9.58988	0.000105927	9.61787	6.77185e-05	9.63688	6.34766e-05	9.65688	3.81195e-05	9.65688	0.000118888
9.59988	8.95996e-06	9.59988	0.000105988	9.62787	6.77185e-05	9.64688	6.34766e-05	9.66688	3.8147e-05	9.66688	0.000118746
9.60988	8.92639e-06	9.60988	0.000105927	9.63787	6.77185e-05	9.65688	6.3446e-05	9.67688	3.81134e-05	9.67688	0.000118855
9.61988	8.9386e-06	9.61988	0.000105988	9.64787	6.7688e-05	9.66688	6.34766e-05	9.68688	3.81378e-05	9.68688	0.000118713
9.62988	8.92639e-06	9.62988	0.000105927	9.65787	6.7688e-05	9.67688	6.3446e-05	9.69688	3.81165e-05	9.69688	0.000118812
9.63988	8.9325e-06	9.63988	0.000105988	9.66787	6.7688e-05	9.68688	6.3446e-05	9.70688	3.81287e-05	9.70688	0.000118681
9.64988	8.94775e-06	9.64988	0.000105896	9.67787	6.76575e-05	9.69688	6.34155e-05	9.71688	3.81104e-05	9.71688	0.00011879
9.65988	8.91418e-06	9.65988	0.000105988	9.68787	6.7627e-05	9.70688	6.3446e-05	9.72688	3.81287e-05	9.72688	0.000118681
9.66988	8.91418e-06	9.66988	0.000105896	9.69787	6.7627e-05	9.71688	6.3385e-05	9.73688	3.81012e-05	9.73688	0.000118768
9.67988	8.92029e-06	9.67988	0.000105927	9.70787	6.7627e-05	9.72688	6.3446e-05	9.74688	3.81073e-05	9.74688	0.00011867
9.68988	8.91113e-06	9.68988	0.000105865	9.71787	6.75964e-05	9.73688	6.33545e-05	9.75688	3.80768e-05	9.75688	0.000118735
9.69988	8.89587e-06	9.69988	0.000105957	9.72787	6.75964e-05	9.74688	6.3385e-05	9.76688	3.80798e-05	9.76688	0.000118626
9.70988	8.89282e-06	9.70988	0.000105927	9.73787	6.75659e-05	9.75688	6.33545e-05	9.77688	3.80707e-05	9.77688	0.000118692
9.71988	8.87451e-06	9.71988	0.000105927	9.74787	6.75659e-05	9.76688	6.3385e-05	9.78688	3.80798e-05	9.78688	0.000118604
9.72988	8.87451e-06	9.72988	0.000105865	9.75787	6.75354e-05	9.77688	6.3324e-05	9.79688	3.80554e-05	9.79688	0.000118659
9.73988	8.88062e-06	9.73988	0.000105927	9.76787	6.75354e-05	9.78688	6.3324e-05	9.80688	3.80737e-05	9.80688	0.000118604
9.74988	8.8501e-06	9.74988	0.000105865	9.77787	6.75354e-05	9.79688	6.3324e-05	9.81688	3.80432e-05	9.81688	0.000118648
9.75988	8.8623e-06	9.75988	0.000105927	9.78787	6.75354e-05	9.80688	6.3324e-05	9.82688	3.80585e-05	9.82688	0.000118582
9.76988	8.8501e-06	9.76988	0.000105865	9.79787	6.75049e-05	9.81688	6.32935e-05	9.83688	3.80341e-05	9.83688	0.000118615
9.77988	8.84399e-06	9.77988	0.000105927	9.80787	6.74744e-05	9.82688	6.3324e-05	9.84688	3.80615e-05	9.84688	0.00011855
9.78988	8.86841e-06	9.78988	0.000105835	9.81787	6.74744e-05	9.83688	6.32629e-05	9.85688	3.80402e-05	9.85688	0.000118571
9.79988	8.83789e-06	9.79988	0.000105896	9.82787	6.74744e-05	9.84688	6.32935e-05	9.86688	3.80646e-05	9.86688	0.000118528
9.80988	8.84399e-06	9.80988	0.000105835	9.83787	6.74438e-05	9.85688	6.32629e-05	9.87688	3.80219e-05	9.87688	0.00011855
9.81988	8.84399e-06	9.81988	0.000105896	9.84787	6.74438e-05	9.86688	6.32935e-05	9.88688	3.8028e-05	9.88688	0.000118517
9.82988	8.81958e-06	9.82988	0.000105835	9.85787	6.74438e-05	9.87688	6.32324e-05	9.89688	3.80066e-05	9.89688	0.00011855
9.83988	8.81042e-06	9.83988	0.000105896	9.86787	6.74133e-05	9.88688	6.32629e-05	9.90688	3.8028e-05	9.90688	0.000118495
9.84988	8.80737e-06	9.84988	0.000105804	9.87787	6.74133e-05	9.89688	6.32324e-05	9.91688	3.79974e-05	9.91688	0.000118495
9.85988	8.83789e-06	9.85988	0.000105865	9.88787	6.74133e-05	9.90688	6.32629e-05	9.92688	3.80127e-05	9.92688	0.000118462
9.86988	8.80432e-06	9.86988	0.000105804	9.89787	6.73828e-05	9.91688	6.32019e-05	9.93688	3.79913e-05	9.93688	0.000118462
9.87988	8.79517e-06	9.87988	0.000105865	9.90787	6.73828e-05	9.92688	6.32324e-05	9.94688	3.79913e-05	9.94688	0.000118419
9.88988	8.77075e-06	9.88988	0.000105835	9.91787	6.73523e-05	9.93688	6.31714e-05	9.95688	3.797e-05	9.95688	0.00011843
9.89988	8.79822e-06	9.89988	0.000105865	9.92787	6.73523e-05	9.94688	6.31714e-05	9.96688	3.79913e-05	9.96688	0.000118419
9.90988	8.78296e-06	9.90988	0.000105804	9.93787	6.73218e-05	9.95688	6.31409e-05	9.97688	3.79608e-05	9.97688	0.000118397
9.91988	8.78601e-06	9.91988	0.000105896	9.94787	6.73218e-05	9.96688	6.31714e-05	9.98688	3.797e-05	9.98688	0.000118375
9.92988	8.77686e-06	9.92988	0.000105804	9.95787	6.73218e-05	9.97688	6.31409e-05	9.99688	3.79395e-05	9.99688	0.000118364
9.93988	8.77991e-06	9.93988	0.000105865	9.96787	6.72913e-05	9.98688	6.31409e-05	10.0069	3.79517e-05	10.0069	0.000118364
9.94988	8.75549e-06	9.94988	0.000105774	9.97787	6.72913e-05	9.99688	6.31104e-05	10.0169	3.79333e-05	10.0169	0.000118331
9.95988	8.7677e-06	9.95988	0.000105835	9.98787	6.72913e-05	10.0069	6.31409e-05	10.0269	3.79578e-05	10.0269	0.000118342
9.96988	8.74939e-06	9.96988	0.000105804	9.99787	6.72607e-05	10.0169	6.30798e-05	10.0369	3.79181e-05	10.0369	0.00011832
9.97988	8.76465e-06	9.97988	0.000105835	10.0079	6.72607e-05	10.0269	6.31409e-05	10.0469	3.79242e-05	10.0469	0.000118342
9.98988	8.72192e-06	9.98988	0.000105774	10.0179	6.72302e-05	10.0369	6.30798e-05	10.0569	3.79028e-05	10.0569	0.000118288
9.99988	8.71277e-06	9.99988	0.000105835	10.0279	6.72607e-05	10.0469	6.30798e-05	10.0669	3.79303e-05	10.0669	0.000118309
10.0099	8.73718e-06	10.0099	0.000105774	10.0379	6.72302e-05	10.0569	6.30798e-05	10.0769	3.78937e-05	10.0769	0.000118266
10.0199	8.71887e-06	10.0199	0.000105804	10.0479	6.71997e-05	10.0669	6.30493e-05	10.0869	3.79242e-05	10.0869	0.000118298
10.0299	8.73108e-06	10.0299	0.000105743	10.0579	6.71692e-05	10.0769	6.30493e-05	10.0969	3.78967e-05	10.0969	0.000118222
10.0399	8.71582e-06	10.0399	0.000105774	10.0679	6.71997e-05	10.0869	6.30493e-05	10.1069	3.79089e-05	10.1069	0.000118277
10.0499	8.72498e-06	10.0499	0.000105713	10.0779	6.71692e-05	10.0969	6.30493e-05	10.1169	3.78815e-05	10.1169	0.000118211
10.0599	8.69446e-06	10.0599	0.000105804	10.0879	6.71692e-05	10.1069	6.30493e-05	10.1269	3.78876e-05	10.1269	0.000118255
10.0699	8.70056e-06	10.0699	0.000105743	10.0979	6.71387e-05	10.1169	6.30188e-05	10.1369	3.78723e-05	10.1369	0.000118178
10.0799	8.68225e-06	10.0799	0.000105804	10.1079	6.71082e-05	10.1269	6.30188e-05	10.1469	3.78845e-05	10.1469	0.000118244
10.0899	8.68225e-06	10.0899	0.000105713	10.1179	6.71387e-05	10.1369	6.30188e-05	10.1569	3.78632e-05	10.1569	0.000118157
10.0999	8.6853e-06	10.0999	0.000105774	10.1279	6.71082e-05	10.1469	6.29883e-05	10.1669	3.78754e-05	10.1669	0.000118222
10.1099	8.6792e-06	10.1099	0.000105743	10.1379	6.70776e-05	10.1569	6.29883e-05	10.1769	3.78448e-05	10.1769	0.000118124
10.1199	8.68225e-06	10.1199	0.000105774	10.1479	6.71082e-05	10.1669	6.29883e-05	10.1869	3.78754e-05	10.1869	0.000118189
10.1299	8.64563e-06	10.1299	0.000105713	10.1579	6.70776e-05	10.1769	6.29578e-05	10.1969	3.78296e-05	10.1969	0.000118091
10.1399	8.6731e-06	10.1399	0.000105743	10.1679	6.70776e-05	10.1869	6.29578e-05	10.2069	3.78632e-05	10.2069	0.000118167
10.1499	8.66699e-06	10.1499	0.000105743	10.1779	6.70471e-05	10.1969	6.29578e-05	10.2169	3.78387e-05	10.2169	0.000118058
10.1599	8.63953e-06	10.1599	0.000105743	10.1879	6.70471e-05	10.2069	6.29272e-05	10.2269	3.78448e-05	10.2269	0.000118146
10.1699	8.63037e-06	10.1699	0.000105713	10.1979	6.70166e-05	10.2169	6.29272e-05	10.2369	3.78326e-05	10.2369	0.000118026
10.1799	8.65173e-06	10.1799	0.000105713	10.2079	6.70471e-05	10.2269	6.29272e-05	10.2469	3.78418e-05	10.2469	0.000118113
10.1899	8.63342e-06	10.1899	0.000105713	10.2179	6.69861e-05	10.2369	6.28967e-05	10.2569	3.78113e-05	10.2569	0.000117993
10.1999	8.64868e-06	10.1999	0.000105743	10.2279	6.69861e-05	10.2469	6.28967e-05	10.2669	3.78204e-05	10.2669	0.000118113
10.2099	8.61206e-06	10.2099	0.000105743	10.2379	6.69861e-05	10.2569	6.28967e-05	10.2769	3.78052e-05	10.2769	0.000117982
10.2199	8.63647e-06	10.2199	0.000105713	10.2479	6.69861e-05	10.2669	6.28967e-05	10.2869	3.78204e-05	10.2869	0.000118091
10.2299	8.62122e-06	10.2299	0.000105743	10.2579	6.6925e-05	10.2769	6.28662e-05	10.2969	3.77869e-05	10.2969	0.00011796
10.2399	8.62122e-06	10.2399	0.000105743	10.2679	6.69556e-05	10.2869	6.28662e-05	10.3069	3.78143e-05	10.3069	0.00011808
10.2499	8.58765e-06	10.2499	0.000105713	10.2779	6.6925e-05	10.2969	6.28662e-05	10.3169	3.77747e-05	10.3169	0.000117916
10.2599	8.60596e-06	10.2599	0.000105713	10.2879	6.6925e-05	10.3069	6.28357e-05	10.3269	3.77838e-05	10.3269	0.000118047
10.2699	8.58154e-06	10.2699	0.000105682	10.2979	6.68945e-05	10.3169	6.28662e-05	10.3369	3.77655e-05	10.3369	0.000117894
10.2799	8.59985e-06	10.2799	0.000105682	10.3079	6.6925e-05	10.3269	6.28052e-05	10.3469	3.77747e-05	10.3469	0.000118026
10.2899	8.57849e-06	10.2899	0.000105652	10.3179	6.6864e-05	10.3369	6.28357e-05	10.3569	3.77563e-05	10.3569	0.000117851
10.2999	8.58765e-06	10.2999	0.000105713	10.3279	6.68945e-05	10.3469	6.28052e-05	10.3669	3.77747e-05	10.3669	0.000118004
10.3099	8.56628e-06	10.3099	0.000105682	10.3379	6.68335e-05	10.3569	6.28052e-05	10.3769	3.77411e-05	10.3769	0.000117829
10.3199	8.56018e-06	10.3199	0.000105682	10.3479	6.68335e-05	10.3669	6.27747e-05	10.3869	3.77533e-05	10.3869	0.000117993
10.3299	8.56018e-06	10.3299	0.000105621	10.3579	6.68335e-05	10.3769	6.28052e-05	10.3969	3.77319e-05	10.3969	0.000117818
10.3399	8.56628e-06	10.3399	0.000105682	10.3679	6.68335e-05	10.3869	6.27747e-05	10.4069	3.77441e-05	10.4069	0.000117993
10.3499	8.52356e-06	10.3499	0.000105621	10.3779	6.6803e-05	10.3969	6.27747e-05	10.4169	3.7738e-05	10.4169	0.000117785
10.3599	8.57849e-06	10.3599	0.000105682	10.3879	6.68335e-05	10.4069	6.27441e-05	10.4269	3.77411e-05	10.4269	0.000117971
10.3699	8.52356e-06	10.3699	0.000105621	10.3979	6.6803e-05	10.4169	6.27441e-05	10.4369	3.77075e-05	10.4369	0.000117763
10.3799	8.55408e-06	10.3799	0.000105652	10.4079	6.6803e-05	10.4269	6.27441e-05	10.4469	3.77411e-05	10.4469	0.000117949
10.3899	8.51746e-06	10.3899	0.000105621	10.4179	6.67725e-05	10.4369	6.27441e-05	10.4569	3.77075e-05	10.4569	0.000117731
10.3999	8.54187e-06	10.3999	0.000105682	10.4279	6.67725e-05	10.4469	6.27136e-05	10.4669	3.77075e-05	10.4669	0.000117938
10.4099	8.52356e-06	10.4099	0.000105621	10.4379	6.67419e-05	10.4569	6.27136e-05	10.4769	3.76953e-05	10.4769	0.00011772
10.4199	8.53271e-06	10.4199	0.000105621	10.4479	6.67419e-05	10.4669	6.27136e-05	10.4869	3.77136e-05	10.4869	0.000117927
10.4299	8.50525e-06	10.4299	0.000105621	10.4579	6.66809e-05	10.4769	6.26831e-05	10.4969	3.76923e-05	10.4969	0.000117687
10.4399	8.52661e-06	10.4399	0.000105621	10.4679	6.67419e-05	10.4869	6.26831e-05	10.5069	3.77106e-05	10.5069	0.000117905
10.4499	8.49304e-06	10.4499	0.000105621	10.4779	6.66809e-05	10.4969	6.26831e-05	10.5169	3.7677e-05	10.5169	0.000117654
10.4599	8.48389e-06	10.4599	0.000105652	10.4879	6.66809e-05	10.5069	6.26831e-05	10.5269	3.76801e-05	10.5269	0.000117862
10.4699	8.48999e-06	10.4699	0.000105591	10.4979	6.66504e-05	10.5169	6.26831e-05	10.5369	3.76709e-05	10.5369	0.0001176
10.4799	8.49609e-06	10.4799	0.000105652	10.5079	6.66809e-05	10.5269	6.26526e-05	10.5469	3.76923e-05	10.5469	0.000117851
10.4899	8.49915e-06	10.4899	0.000105591	10.5179	6.66199e-05	10.5369	6.26526e-05	10.5569	3.76434e-05	10.5569	0.000117578
10.4999	8.47778e-06	10.4999	0.000105621	10.5279	6.66504e-05	10.5469	6.26526e-05	10.5669	3.76709e-05	10.5669	0.000117829
10.5099	8.48694e-06	10.5099	0.000105591	10.5379	6.66199e-05	10.5569	6.26221e-05	10.5769	3.76648e-05	10.5769	0.000117567
10.5199	8.45032e-06	10.5199	0.000105621	10.5479	6.66199e-05	10.5669	6.26221e-05	10.5869	3.76587e-05	10.5869	0.00011784
10.5299	8.46863e-06	10.5299	0.000105591	10.5579	6.65894e-05	10.5769	6.26526e-05	10.5969	3.76465e-05	10.5969	0.000117545
10.5399	8.46558e-06	10.5399	0.000105621	10.5679	6.66199e-05	10.5869	6.26526e-05	10.6069	3.76587e-05	10.6069	0.000117818
10.5499	8.46252e-06	10.5499	0.000105591	10.5779	6.65588e-05	10.5969	6.26221e-05	10.6169	3.76221e-05	10.6169	0.000117512
10.5599	8.45947e-06	10.5599	0.000105621	10.5879	6.65588e-05	10.6069	6.26526e-05	10.6269	3.76312e-05	10.6269	0.000117807
10.5699	8.44727e-06	10.5699	0.00010556	10.5979	6.65588e-05	10.6169	6.27747e-05	10.6369	3.76251e-05	10.6369	0.00011748
10.5799	8.44116e-06	10.5799	0.000105591	10.6079	6.65894e-05	10.6269	6.32324e-05	10.6469	3.76221e-05	10.6469	0.000117774
10.5899	8.43506e-06	10.5899	0.00010556	10.6179	6.65283e-05	10.6369	6.39038e-05	10.6569	3.7619e-05	10.6569	0.000117447
10.5999	8.44421e-06	10.5999	0.00010556	10.6279	6.65283e-05	10.6469	6.50024e-05	10.6669	3.7616e-05	10.6669	0.000117753
10.6099	8.44421e-06	10.6099	0.00010553	10.6379	6.65283e-05	10.6569	6.62231e-05	10.6769	3.75946e-05	10.6769	0.000117403
10.6199	8.41064e-06	10.6199	0.000105591	10.6479	6.65283e-05	10.6669	6.74744e-05	10.6869	3.76038e-05	10.6869	0.000117731
10.6299	8.4259e-06	10.6299	0.00010553	10.6579	6.64673e-05	10.6769	6.91528e-05	10.6969	3.75946e-05	10.6969	0.00011737
10.6399	8.4137e-06	10.6399	0.00010556	10.6679	6.65283e-05	10.6869	7.17468e-05	10.7069	3.75977e-05	10.7069	0.000117709
10.6499	8.41064e-06	10.6499	0.00010553	10.6779	6.64673e-05	10.6969	7.65076e-05	10.7169	3.75854e-05	10.7169	0.000117359
10.6599	8.37402e-06	10.6599	0.00010556	10.6879	6.64978e-05	10.7069	8.29163e-05	10.7269	3.75916e-05	10.7269	0.000117698
10.6699	8.4137e-06	10.6699	0.00010553	10.6979	6.64368e-05	10.7169	9.04541e-05	10.7369	3.7558e-05	10.7369	0.000117327
10.6799	8.37708e-06	10.6799	0.000105621	10.7079	6.64673e-05	10.7269	9.83582e-05	10.7469	3.75793e-05	10.7469	0.000117687
10.6899	8.38623e-06	10.6899	0.000105591	10.7179	6.64063e-05	10.7369	0.000102997	10.7569	3.7558e-05	10.7569	0.000117305
10.6999	8.36487e-06	10.6999	0.000105652	10.7279	6.64368e-05	10.7469	0.000104828	10.7669	3.7558e-05	10.7669	0.000117665
10.7099	8.40759e-06	10.7099	0.000105682	10.7379	6.64063e-05	10.7569	0.000105743	10.7769	3.75549e-05	10.7769	0.000117272
10.7199	8.36792e-06	10.7199	0.000105896	10.7479	6.64063e-05	10.7669	0.000106445	10.7869	3.75488e-05	10.7869	0.000117632
10.7299	8.39539e-06	10.7299	0.000106079	10.7579	6.63757e-05	10.7769	0.000106934	10.7969	3.75458e-05	10.7969	0.000117239
10.7399	8.37708e-06	10.7399	0.000106293	10.7679	6.64063e-05	10.7869	0.0001073	10.8069	3.75549e-05	10.8069	0.0001176
10.7499	8.34961e-06	10.7499	0.000106445	10.7779	6.63452e-05	10.7969	0.000107544	10.8169	3.75671e-05	10.8169	0.000117185
10.7599	8.34351e-06	10.7599	0.000106689	10.7879	6.63757e-05	10.8069	0.000107819	10.8269	3.75519e-05	10.8269	0.000117556
10.7699	8.38013e-06	10.7699	0.000106903	10.7979	6.63452e-05	10.8169	0.000108002	10.8369	3.75214e-05	10.8369	0.000117163
10.7799	8.34351e-06	10.7799	0.000107086	10.8079	6.63452e-05	10.8269	0.000108215	10.8469	3.75122e-05	10.8469	0.000117545
10.7899	8.34351e-06	10.7899	0.0001073	10.8179	6.63147e-05	10.8369	0.000108337	10.8569	3.75244e-05	10.8569	0.000117152
10.7999	8.3374e-06	10.7999	0.000107574	10.8279	6.63452e-05	10.8469	0.00010849	10.8669	3.75183e-05	10.8669	0.000117545
10.8099	8.34351e-06	10.8099	0.000107849	10.8379	6.62842e-05	10.8569	0.000108582	10.8769	3.75031e-05	10.8769	0.00011713
10.8199	8.32825e-06	10.8199	0.000108307	10.8479	6.63147e-05	10.8669	0.000108643	10.8869	3.75031e-05	10.8869	0.000117512
10.8299	8.3374e-06	10.8299	0.000108826	10.8579	6.62842e-05	10.8769	0.000108673	10.8969	3.74878e-05	10.8969	0.000117086
10.8399	8.31604e-06	10.8399	0.000109253	10.8679	6.62842e-05	10.8869	0.000108765	10.9069	3.74939e-05	10.9069	0.00011748
10.8499	8.34351e-06	10.8499	0.000109558	10.8779	6.62537e-05	10.8969	0.000108826	10.9169	3.74908e-05	10.9169	0.000117054
10.8599	8.28552e-06	10.8599	0.000109711	10.8879	6.62537e-05	10.9069	0.000108856	10.9269	3.74756e-05	10.9269	0.000117469
10.8699	8.32214e-06	10.8699	0.000109833	10.8979	6.62231e-05	10.9169	0.000108948	10.9369	3.74756e-05	10.9369	0.000117043
10.8799	2.8833e-05	10.8799	0.000109894	10.9079	6.62537e-05	10.9269	0.000109009	10.9469	3.74847e-05	10.9469	0.000117447
10.8899	3.36731e-05	10.8899	0.000109894	10.9179	6.61926e-05	10.9369	0.0001091	10.9569	3.74603e-05	10.9569	0.000117021
10.8999	3.25958e-05	10.8999	0.000109894	10.9279	6.62537e-05	10.9469	0.000109131	10.9669	3.74725e-05	10.9669	0.000117436
10.9099	3.25043e-05	10.9099	0.000109924	10.9379	6.61926e-05	10.9569	0.000109192	10.9769	3.74542e-05	10.9769	0.000116999
10.9199	3.23273e-05	10.9199	0.000109955	10.9479	6.61926e-05	10.9669	0.000109222	10.9869	3.74603e-05	10.9869	0.000117425
10.9299	3.31055e-05	10.9299	0.000110016	10.9579	6.61621e-05	10.9769	0.000109314	10.9969	3.74542e-05	10.9969	0.000116999
10.9399	3.42194e-05	10.9399	0.000110046	10.9679	6.61926e-05	10.9869	0.000109314	11.0069	3.75e-05	11.0069	0.000117447
10.9499	3.64044e-05	10.9499	0.000110077	10.9779	6.61621e-05	10.9969	0.000109406	11.0169	3.75366e-05	11.0169	0.000117032
10.9599	3.69659e-05	10.9599	0.000110077	10.9879	6.61621e-05	11.0069	0.000109436	11.0269	3.77136e-05	11.0269	0.00011748
10.9699	3.80768e-05	10.9699	0.000110107	10.9979	6.61316e-05	11.0169	0.000109528	11.0369	3.80432e-05	11.0369	0.000117043
10.9799	3.75336e-05	10.9799	0.000110138	11.0079	6.61926e-05	11.0269	0.000109558	11.0469	3.86047e-05	11.0469	0.000117501
10.9899	3.72437e-05	10.9899	0.000110107	11.0179	6.61621e-05	11.0369	0.000109589	11.0569	3.9682e-05	11.0569	0.000117043
10.9999	3.75275e-05	10.9999	0.000110138	11.0279	6.62537e-05	11.0469	0.000109619	11.0669	4.19647e-05	11.0669	0.00011748
11.0099	3.72223e-05	11.0099	0.000110138	11.0379	6.63452e-05	11.0569	0.00010965	11.0769	4.51538e-05	11.0769	0.000117043
11.0199	3.7738e-05	11.0199	0.000110138	11.0479	6.65588e-05	11.0669	0.00010968	11.0869	4.86755e-05	11.0869	0.000117501
11.0299	3.75183e-05	11.0299	0.000110168	11.0579	6.67114e-05	11.0769	0.000109741	11.0969	5.22095e-05	11.0969	0.000117032
11.0399	3.7735e-05	11.0399	0.000110168	11.0679	6.70166e-05	11.0869	0.000109772	11.1069	5.53864e-05	11.1069	0.00011749
11.0499	3.87268e-05	11.0499	0.000110168	11.0779	6.74438e-05	11.0969	0.000109833	11.1169	5.78033e-05	11.1169	0.000117043
11.0599	3.82843e-05	11.0599	0.000110168	11.0879	6.83594e-05	11.1069	0.000109863	11.1269	5.98694e-05	11.1269	0.00011749
11.0699	3.82233e-05	11.0699	0.000110138	11.0979	6.9397e-05	11.1169	0.000109894	11.1369	6.1615e-05	11.1369	0.000117021
11.0799	3.86871e-05	11.0799	0.000110199	11.1079	7.05872e-05	11.1269	0.000109894	11.1469	6.32324e-05	11.1469	0.00011749
11.0899	3.88824e-05	11.0899	0.000110199	11.1179	7.18994e-05	11.1369	0.000109955	11.1569	6.52466e-05	11.1569	0.000117021
11.0999	3.82446e-05	11.0999	0.000110199	11.1279	7.33032e-05	11.1469	0.000109985	11.1669	6.7688e-05	11.1669	0.00011748
11.1099	3.86749e-05	11.1099	0.00011026	11.1379	7.44629e-05	11.1569	0.000110016	11.1769	7.01904e-05	11.1769	0.000116999
11.1199	3.88855e-05	11.1199	0.00011026	11.1479	7.59583e-05	11.1669	0.000110016	11.1869	7.24792e-05	11.1869	0.000117458
11.1299	3.83575e-05	11.1299	0.000110291	11.1579	7.75452e-05	11.1769	0.000110046	11.1969	7.41882e-05	11.1969	0.000116966
11.1399	3.83148e-05	11.1399	0.000110291	11.1679	7.91626e-05	11.1869	0.000110016	11.2069	7.53174e-05	11.2069	0.000117425
11.1499	3.86108e-05	11.1499	0.000110321	11.1779	8.06885e-05	11.1969	0.000110016	11.2169	7.60803e-05	11.2169	0.000116934
11.1599	3.82996e-05	11.1599	0.000110352	11.1879	8.23059e-05	11.2069	0.000109955	11.2269	7.66296e-05	11.2269	0.000117414
11.1699	3.80463e-05	11.1699	0.000110413	11.1979	8.39233e-05	11.2169	0.000109985	11.2369	7.70569e-05	11.2369	0.000116923
11.1799	3.82446e-05	11.1799	0.000110535	11.2079	8.56018e-05	11.2269	0.000109894	11.2469	7.73926e-05	11.2469	0.000117403
11.1899	3.83972e-05	11.1899	0.000110687	11.2179	8.69751e-05	11.2369	0.000109924	11.2569	7.76367e-05	11.2569	0.000116901
11.1999	3.80676e-05	11.1999	0.000110992	11.2279	8.79822e-05	11.2469	0.000109894	11.2669	7.78198e-05	11.2669	0.000117381
11.2099	3.74664e-05	11.2099	0.000112122	11.2379	8.85315e-05	11.2569	0.000109924	11.2769	7.79724e-05	11.2769	0.000116857
11.2199	3.69629e-05	11.2199	0.000115204	11.2479	8.89282e-05	11.2669	0.000109894	11.2869	7.80945e-05	11.2869	0.000117338
11.2299	3.68622e-05	11.2299	0.000120483	11.2579	8.91418e-05	11.2769	0.000109924	11.2969	7.82471e-05	11.2969	0.000116824
11.2399	3.71368e-05	11.2399	0.000127716	11.2679	8.9386e-05	11.2869	0.000109924	11.3069	7.83691e-05	11.3069	0.000117316
11.2499	3.76709e-05	11.2499	0.000138672	11.2779	8.95386e-05	11.2969	0.000109985	11.3169	7.84912e-05	11.3169	0.000116792
11.2599	3.71399e-05	11.2599	0.000145142	11.2879	8.97217e-05	11.3069	0.000109894	11.3269	7.85522e-05	11.3269	0.000117294
11.2699	3.67249e-05	11.2699	0.00014566	11.2979	8.98132e-05	11.3169	0.000109924	11.3369	7.86438e-05	11.3369	0.00011677
11.2799	3.56567e-05	11.2799	0.000145691	11.3079	8.99658e-05	11.3269	0.000109863	11.3469	7.87354e-05	11.3469	0.000117261
11.2899	3.44025e-05	11.2899	0.000145752	11.3179	9.00574e-05	11.3369	0.000109924	11.3569	7.88269e-05	11.3569	0.000116737
11.2999	3.29102e-05	11.2999	0.00014563	11.3279	9.01794e-05	11.3469	0.000109802	11.3669	7.88879e-05	11.3669	0.000117239
11.3099	3.16833e-05	11.3099	0.000145752	11.3379	9.0271e-05	11.3569	0.000109863	11.3769	7.901e-05	11.3769	0.000116704
11.3199	3.03955e-05	11.3199	0.00014566	11.3479	9.03931e-05	11.3669	0.000109772	11.3869	7.90405e-05	11.3869	0.000117217
11.3299	2.93182e-05	11.3299	0.000145599	11.3579	9.04846e-05	11.3769	0.000109802	11.3969	7.91321e-05	11.3969	0.000116682
11.3399	2.85248e-05	11.3399	0.00014566	11.3679	9.06067e-05	11.3869	0.000109741	11.4069	7.91626e-05	11.4069	0.000117196
11.3499	2.76001e-05	11.3499	0.00014566	11.3779	9.06677e-05	11.3969	0.000109802	11.4169	7.92542e-05	11.4169	0.000116661
11.3599	2.68738e-05	11.3599	0.000145538	11.3879	9.07898e-05	11.4069	0.000109772	11.4269	7.93152e-05	11.4269	0.000117185
11.3699	2.60956e-05	11.3699	0.000145569	11.3979	9.08203e-05	11.4169	0.000109802	11.4369	7.93762e-05	11.4369	0.000116639
11.3799	2.5412e-05	11.3799	0.000145447	11.4079	9.09424e-05	11.4269	0.000109772	11.4469	7.94373e-05	11.4469	0.000117174
11.3899	2.50763e-05	11.3899	0.000145416	11.4179	9.09729e-05	11.4369	0.000109802	11.4569	7.94983e-05	11.4569	0.000116606
11.3999	2.45239e-05	11.3999	0.000145325	11.4279	9.10645e-05	11.4469	0.000109772	11.4669	7.95288e-05	11.4669	0.00011713
11.4099	2.4176e-05	11.4099	0.000145294	11.4379	9.1095e-05	11.4569	0.000109802	11.4769	7.95898e-05	11.4769	0.000116573
11.4199	2.38617e-05	11.4199	0.000145203	11.4479	9.12476e-05	11.4669	0.000109802	11.4869	7.95898e-05	11.4869	0.000117108
11.4299	2.34344e-05	11.4299	0.000145233	11.4579	9.12781e-05	11.4769	0.000109802	11.4969	7.96509e-05	11.4969	0.000116541
11.4399	2.31628e-05	11.4399	0.000145142	11.4679	9.13696e-05	11.4869	0.000109772	11.5069	7.96204e-05	11.5069	0.000117086
11.4499	2.29492e-05	11.4499	0.000145142	11.4779	9.14001e-05	11.4969	0.000109802	11.5169	7.96509e-05	11.5169	0.000116519
11.4599	2.26013e-05	11.4599	0.00014505	11.4879	9.14917e-05	11.5069	0.000109711	11.5269	7.96204e-05	11.5269	0.000117043
11.4699	2.24274e-05	11.4699	0.000145081	11.4979	9.14917e-05	11.5169	0.000109741	11.5369	7.96509e-05	11.5369	0.000116475
11.4799	2.22137e-05	11.4799	0.000144989	11.5079	9.16138e-05	11.5269	0.00010968	11.5469	7.96814e-05	11.5469	0.000117021
11.4899	2.2049e-05	11.4899	0.00014502	11.5179	9.15833e-05	11.5369	0.00010968	11.5569	7.97729e-05	11.5569	0.000116453
11.4999	2.17987e-05	11.4999	0.000144928	11.5279	9.16748e-05	11.5469	0.000109619	11.5669	7.97729e-05	11.5669	0.00011701
11.5099	2.17255e-05	11.5099	0.000144897	11.5379	9.16748e-05	11.5569	0.000109619	11.5769	7.9834e-05	11.5769	0.000116453
11.5199	2.15881e-05	11.5199	0.000144806	11.5479	9.17969e-05	11.5669	0.000109619	11.5869	7.9834e-05	11.5869	0.000116988
11.5299	2.14203e-05	11.5299	0.000144775	11.5579	9.18274e-05	11.5769	0.000109619	11.5969	7.9895e-05	11.5969	0.000116409
11.5399	2.13226e-05	11.5399	0.000144714	11.5679	9.19189e-05	11.5869	0.000109619	11.6069	7.9895e-05	11.6069	0.000116955
11.5499	2.12219e-05	11.5499	0.000144714	11.5779	9.19189e-05	11.5969	0.000109619	11.6169	7.9895e-05	11.6169	0.000116366
11.5599	2.10693e-05	11.5599	0.000144592	11.5879	9.198e-05	11.6069	0.000109589	11.6269	7.99255e-05	11.6269	0.000116912
11.5699	2.10358e-05	11.5699	0.000144592	11.5979	9.20105e-05	11.6169	0.00010965	11.6369	7.99561e-05	11.6369	0.000116355
11.5799	2.08862e-05	11.5799	0.000144501	11.6079	9.20715e-05	11.6269	0.000109619	11.6469	7.99255e-05	11.6469	0.000116901
11.5899	2.08252e-05	11.5899	0.00014447	11.6179	9.20715e-05	11.6369	0.00010965	11.6569	7.99866e-05	11.6569	0.000116322
11.5999	2.07428e-05	11.5999	0.000144379	11.6279	9.21631e-05	11.6469	0.000109589	11.6669	7.99866e-05	11.6669	0.000116879
11.6099	2.0694e-05	11.6099	0.000144379	11.6379	9.21631e-05	11.6569	0.000109589	11.6769	8.00171e-05	11.6769	0.0001163
11.6199	2.06207e-05	11.6199	0.000144318	11.6479	9.22852e-05	11.6669	0.000109558	11.6869	8.00476e-05	11.6869	0.000116835
11.6299	2.0575e-05	11.6299	0.000144287	11.6579	9.22852e-05	11.6769	0.000109558	11.6969	8.00476e-05	11.6969	0.000116257
11.6399	2.052e-05	11.6399	0.000144226	11.6679	9.23462e-05	11.6869	0.000109528	11.7069	8.00781e-05	11.7069	0.000116813
11.6499	2.04987e-05	11.6499	0.000144257	11.6779	9.23462e-05	11.6969	0.000109497	11.7169	8.00781e-05	11.7169	0.000116224
11.6599	2.04254e-05	11.6599	0.000144135	11.6879	9.24072e-05	11.7069	0.000109467	11.7269	8.00476e-05	11.7269	0.000116781
11.6699	2.0401e-05	11.6699	0.000144165	11.6979	9.23767e-05	11.7169	0.000109497	11.7369	8.00781e-05	11.7369	0.000116202
11.6799	2.03247e-05	11.6799	0.000144104	11.7079	9.24683e-05	11.7269	0.000109467	11.7469	8.01086e-05	11.7469	0.000116759
11.6899	2.02911e-05	11.6899	0.000144104	11.7179	9.24683e-05	11.7369	0.000109467	11.7569	8.01086e-05	11.7569	0.000116169
11.6999	2.02667e-05	11.6999	0.000144012	11.7279	9.25293e-05	11.7469	0.000109406	11.7669	8.01392e-05	11.7669	0.000116737
11.7099	2.02423e-05	11.7099	0.000144012	11.7379	9.25598e-05	11.7569	0.000109436	11.7769	8.01697e-05	11.7769	0.000116147
11.7199	2.01691e-05	11.7199	0.000143921	11.7479	9.26208e-05	11.7669	0.000109406	11.7869	8.02002e-05	11.7869	0.000116715
11.7299	2.01721e-05	11.7299	0.000143921	11.7579	9.26208e-05	11.7769	0.000109436	11.7969	8.02307e-05	11.7969	0.000116126
11.7399	2.01447e-05	11.7399	0.000143799	11.7679	9.26819e-05	11.7869	0.000109436	11.8069	8.02002e-05	11.8069	0.000116693
11.7499	2.01141e-05	11.7499	0.000143829	11.7779	9.26819e-05	11.7969	0.000109467	11.8169	8.02612e-05	11.8169	0.000116093
11.7599	2.00775e-05	11.7599	0.000143707	11.7879	9.27429e-05	11.8069	0.000109406	11.8269	8.02307e-05	11.8269	0.00011665
11.7699	2.00775e-05	11.7699	0.000143768	11.7979	9.27429e-05	11.8169	0.000109436	11.8369	8.02917e-05	11.8369	0.000116038
11.7799	2.00256e-05	11.7799	0.000143677	11.8079	9.27734e-05	11.8269	0.000109344	11.8469	8.02917e-05	11.8469	0.000116617
11.7899	2.00256e-05	11.7899	0.000143677	11.8179	9.28345e-05	11.8369	0.000109406	11.8569	8.03223e-05	11.8569	0.000116027
11.7999	1.99799e-05	11.7999	0.000143555	11.8279	9.2865e-05	11.8469	0.000109314	11.8669	8.03223e-05	11.8669	0.000116595
11.8099	1.99677e-05	11.8099	0.000143616	11.8379	9.2926e-05	11.8569	0.000109344	11.8769	8.03223e-05	11.8769	0.000116005
11.8199	1.99493e-05	11.8199	0.000143494	11.8479	9.28955e-05	11.8669	0.000109253	11.8869	8.02917e-05	11.8869	0.000116573
11.8299	1.99554e-05	11.8299	0.000143494	11.8579	9.29565e-05	11.8769	0.000109314	11.8969	8.02917e-05	11.8969	0.000115962
11.8399	1.98822e-05	11.8399	0.000143433	11.8679	9.29565e-05	11.8869	0.000109283	11.9069	8.02917e-05	11.9069	0.00011653
11.8499	1.98975e-05	11.8499	0.000143433	11.8779	9.29871e-05	11.8969	0.000109314	11.9169	8.02612e-05	11.9169	0.000115951
11.8599	1.98456e-05	11.8599	0.000143311	11.8879	9.30176e-05	11.9069	0.000109283	11.9269	8.02307e-05	11.9269	0.000116519
11.8699	1.98761e-05	11.8699	0.000143341	11.8979	9.30481e-05	11.9169	0.000109314	11.9369	8.02612e-05	11.9369	0.000115929
11.8799	1.98181e-05	11.8799	0.00014325	11.9079	9.30481e-05	11.9269	0.000109283	11.9469	8.02612e-05	11.9469	0.000116508
11.8899	1.98639e-05	11.8899	0.000143311	11.9179	9.31091e-05	11.9369	0.000109344	11.9569	8.03223e-05	11.9569	0.000115896
11.8999	1.98029e-05	11.8999	0.000143158	11.9279	9.31396e-05	11.9469	0.000109283	11.9669	8.02917e-05	11.9669	0.000116453
11.9099	1.98242e-05	11.9099	0.000143219	11.9379	9.31396e-05	11.9569	0.000109344	11.9769	8.03223e-05	11.9769	0.000115842
11.9199	1.97662e-05	11.9199	0.000143127	11.9479	9.32007e-05	11.9669	0.000109283	11.9869	8.03223e-05	11.9869	0.000116409
11.9299	1.98059e-05	11.9299	0.000143158	11.9579	9.32312e-05	11.9769	0.000109344	11.9969	8.03833e-05	11.9969	0.000115798
11.9399	1.9751e-05	11.9399	0.000143036	11.9679	9.32312e-05	11.9869	0.000109314	12.0069	8.03223e-05	12.0069	0.000116377
11.9499	1.97754e-05	11.9499	0.000143066	11.9779	9.32617e-05	11.9969	0.000109283	12.0169	8.03528e-05	12.0169	0.00011547
11.9599	1.97388e-05	11.9599	0.000142975	11.9879	9.32617e-05	12.0069	0.000109253	12.0269	8.03528e-05	12.0269	0.000114979
11.9699	1.97479e-05	11.9699	0.000143036	11.9979	9.32922e-05	12.0169	0.000109253	12.0369	8.03833e-05	12.0369	0.000112839
11.9799	1.97052e-05	11.9799	0.000142944	12.0079	9.33228e-05	12.0269	0.000109192	12.0469	8.03528e-05	12.0469	0.000111288
11.9899	1.97296e-05	11.9899	0.000142944	12.0179	9.33533e-05	12.0369	0.000109253	12.0569	8.03833e-05	12.0569	0.00010786
11.9999	1.9696e-05	11.9999	0.000142883	12.0279	9.33838e-05	12.0469	0.000109192	12.0669	8.03833e-05	12.0669	0.000105414
12.0099	1.97052e-05	12.0099	0.000142853	12.0379	9.33838e-05	12.0569	0.000109222	12.0769	8.04138e-05	12.0769	0.000102335
12.0199	1.96442e-05	12.0199	0.000142792	12.0479	9.34143e-05	12.0669	0.000109192	12.0869	8.03833e-05	12.0869	0.000100839
12.0299	1.96899e-05	12.0299	0.000142822	12.0579	9.34448e-05	12.0769	0.000109222	12.0969	8.04138e-05	12.0969	9.87422e-05
12.0399	1.96533e-05	12.0399	0.0001427	12.0679	9.34753e-05	12.0869	0.000109192	12.1069	8.04138e-05	12.1069	9.84693e-05
12.0499	1.96686e-05	12.0499	0.000142792	12.0779	9.34753e-05	12.0969	0.000109222	12.1169	8.04138e-05	12.1169	9.75084e-05
12.0599	1.9632e-05	12.0599	0.0001427	12.0879	9.35059e-05	12.1069	0.000109192	12.1269	8.03833e-05	12.1269	9.79124e-05
12.0699	1.96716e-05	12.0699	0.000142731	12.0979	9.35364e-05	12.1169	0.000109222	12.1369	8.04138e-05	12.1369	9.72026e-05
12.0799	1.9632e-05	12.0799	0.000142639	12.1079	9.35364e-05	12.1269	0.000109192	12.1469	8.04138e-05	12.1469	9.76503e-05
12.0899	1.96289e-05	12.0899	0.00014267	12.1179	9.35669e-05	12.1369	0.000109192	12.1569	8.04138e-05	12.1569	9.69624e-05
12.0999	1.96045e-05	12.0999	0.000142548	12.1279	9.35974e-05	12.1469	0.000109131	12.1669	8.04138e-05	12.1669	9.74319e-05
12.1099	1.96075e-05	12.1099	0.000142639	12.1379	9.36279e-05	12.1569	0.000109161	12.1769	8.04443e-05	12.1769	9.67659e-05
12.1199	1.95709e-05	12.1199	0.000142517	12.1479	9.36279e-05	12.1669	0.000109039	12.1869	8.04443e-05	12.1869	9.72572e-05
12.1299	1.95923e-05	12.1299	0.000142578	12.1579	9.36584e-05	12.1769	0.0001091	12.1969	8.04749e-05	12.1969	9.66021e-05
12.1399	1.95709e-05	12.1399	0.000142456	12.1679	9.36279e-05	12.1869	0.000109009	12.2069	8.04443e-05	12.2069	9.70934e-05
12.1499	1.95831e-05	12.1499	0.000142487	12.1779	9.36584e-05	12.1969	0.000109039	12.2169	8.04749e-05	12.2169	9.64492e-05
12.1599	1.95496e-05	12.1599	0.000142426	12.1879	9.36584e-05	12.2069	0.000109009	12.2269	8.04443e-05	12.2269	9.69515e-05
12.1699	1.95557e-05	12.1699	0.000142426	12.1979	9.3689e-05	12.2169	0.000109039	12.2369	8.04749e-05	12.2369	9.62963e-05
12.1799	1.95251e-05	12.1799	0.000142365	12.2079	9.37195e-05	12.2269	0.000108978	12.2469	8.04443e-05	12.2469	9.67986e-05
12.1899	1.95282e-05	12.1899	0.000142395	12.2179	9.375e-05	12.2369	0.000109009	12.2569	8.05054e-05	12.2569	9.61762e-05
12.1999	1.95099e-05	12.1999	0.000142334	12.2279	9.375e-05	12.2469	0.000108978	12.2669	8.04749e-05	12.2669	9.66785e-05
12.2099	1.95251e-05	12.2099	0.000142365	12.2379	9.37805e-05	12.2569	0.000109009	12.2769	8.04749e-05	12.2769	9.60561e-05
12.2199	1.94855e-05	12.2199	0.000142273	12.2479	9.37805e-05	12.2669	0.000108978	12.2869	8.04443e-05	12.2869	9.65693e-05
12.2299	1.95038e-05	12.2299	0.000142273	12.2579	9.37805e-05	12.2769	0.000109009	12.2969	8.04443e-05	12.2969	9.59578e-05
12.2399	1.94916e-05	12.2399	0.000142212	12.2679	9.37805e-05	12.2869	0.000108948	12.3069	8.03833e-05	12.3069	9.64601e-05
12.2499	1.94977e-05	12.2499	0.000142242	12.2779	9.3811e-05	12.2969	0.000108978	12.3169	8.03833e-05	12.3169	9.58596e-05
12.2599	1.94702e-05	12.2599	0.000142151	12.2879	9.3811e-05	12.3069	0.000108948	12.3269	8.03833e-05	12.3269	9.63618e-05
12.2699	1.94794e-05	12.2699	0.000142212	12.2979	9.38416e-05	12.3169	0.000108978	12.3369	8.04443e-05	12.3369	9.57722e-05
12.2799	1.94489e-05	12.2799	0.00014209	12.3079	9.38416e-05	12.3269	0.000108887	12.3469	8.04138e-05	12.3469	9.62636e-05
12.2899	1.94855e-05	12.2899	0.000142151	12.3179	9.38721e-05	12.3369	0.000108948	12.3569	8.04443e-05	12.3569	9.56849e-05
12.2999	1.94611e-05	12.2999	0.000142059	12.3279	9.39026e-05	12.3469	0.000108887	12.3669	8.04138e-05	12.3669	9.61762e-05
12.3099	1.94519e-05	12.3099	0.00014209	12.3379	9.39331e-05	12.3569	0.000108917	12.3769	8.04443e-05	12.3769	9.55975e-05
12.3199	1.94489e-05	12.3199	0.000141998	12.3479	9.39026e-05	12.3669	0.000108856	12.3869	8.04138e-05	12.3869	9.60779e-05
12.3299	1.94427e-05	12.3299	0.000142029	12.3579	9.39331e-05	12.3769	0.000108856	12.3969	8.04138e-05	12.3969	9.55102e-05
12.3399	1.94092e-05	12.3399	0.000141937	12.3679	9.39331e-05	12.3869	0.000108856	12.4069	8.03833e-05	12.4069	9.59906e-05
12.3499	1.94489e-05	12.3499	0.000141968	12.3779	9.39636e-05	12.3969	0.000108917	12.4169	8.04138e-05	12.4169	9.54337e-05
12.3599	1.94e-05	12.3599	0.000141907	12.3879	9.39636e-05	12.4069	0.000108856	12.4269	8.03833e-05	12.4269	9.59142e-05
12.3699	1.94244e-05	12.3699	0.000141968	12.3979	9.39941e-05	12.4169	0.000108917	12.4369	8.04138e-05	12.4369	9.53573e-05
12.3799	1.93756e-05	12.3799	0.000141876	12.4079	9.40247e-05	12.4269	0.000108856	12.4469	8.03833e-05	12.4469	9.58377e-05
12.3899	1.94214e-05	12.3899	0.000141937	12.4179	9.40247e-05	12.4369	0.000108917	12.4569	8.04138e-05	12.4569	9.52808e-05
12.3999	1.93451e-05	12.3999	0.000141815	12.4279	9.40247e-05	12.4469	0.000108856	12.4669	8.03528e-05	12.4669	9.57504e-05
12.4099	1.94092e-05	12.4099	0.000141907	12.4379	9.40247e-05	12.4569	0.000108887	12.4769	8.03833e-05	12.4769	9.52044e-05
12.4199	1.93634e-05	12.4199	0.000141846	12.4479	9.40247e-05	12.4669	0.000108856	12.4869	8.03528e-05	12.4869	9.56739e-05
12.4299	1.93787e-05	12.4299	0.000141907	12.4579	9.40552e-05	12.4769	0.000108887	12.4969	8.03833e-05	12.4969	9.51171e-05
12.4399	1.93634e-05	12.4399	0.000141754	12.4679	9.40552e-05	12.4869	0.000108795	12.5069	8.03223e-05	12.5069	9.55866e-05
12.4499	1.93634e-05	12.4499	0.000141815	12.4779	9.41162e-05	12.4969	0.000108795	12.5169	8.03223e-05	12.5169	9.50625e-05
12.4599	1.93176e-05	12.4599	0.000141724	12.4879	9.41162e-05	12.5069	0.000108765	12.5269	8.03223e-05	12.5269	9.5532e-05
12.4699	1.93695e-05	12.4699	0.000141785	12.4979	9.41467e-05	12.5169	0.000108795	12.5369	8.03528e-05	12.5369	9.50079e-05
12.4799	1.93146e-05	12.4799	0.000141663	12.5079	9.41467e-05	12.5269	0.000108734	12.5469	8.03528e-05	12.5469	9.54774e-05
12.4899	1.93573e-05	12.4899	0.000141724	12.5179	9.42078e-05	12.5369	0.000108795	12.5569	8.03833e-05	12.5569	9.49533e-05
12.4999	1.93085e-05	12.4999	0.000141663	12.5279	9.41467e-05	12.5469	0.000108765	12.5669	8.03528e-05	12.5669	9.54119e-05
12.5099	1.9342e-05	12.5099	0.000141663	12.5379	9.41772e-05	12.5569	0.000108826	12.5769	8.03833e-05	12.5769	9.48768e-05
12.5199	1.93024e-05	12.5199	0.000141571	12.5479	9.41467e-05	12.5669	0.000108795	12.5869	8.03528e-05	12.5869	9.53354e-05
12.5299	1.9339e-05	12.5299	0.000141632	12.5579	9.42078e-05	12.5769	0.000108856	12.5969	8.03833e-05	12.5969	9.48113e-05
12.5399	1.92841e-05	12.5399	0.000141541	12.5679	9.42078e-05	12.5869	0.000108795	12.6069	8.03833e-05	12.6069	9.5259e-05
12.5499	1.93207e-05	12.5499	0.000141602	12.5779	9.42383e-05	12.5969	0.000108826	12.6169	8.03833e-05	12.6169	9.47349e-05
12.5599	1.92657e-05	12.5599	0.000141479	12.5879	9.42383e-05	12.6069	0.000108795	12.6269	8.03833e-05	12.6269	9.51935e-05
12.5699	1.93207e-05	12.5699	0.00014151	12.5979	9.42688e-05	12.6169	0.000108795	12.6369	8.04138e-05	12.6369	9.46803e-05
12.5799	1.9278e-05	12.5799	0.000141479	12.6079	9.42688e-05	12.6269	0.000108734	12.6469	8.03833e-05	12.6469	9.51389e-05
12.5899	1.93115e-05	12.5899	0.000141479	12.6179	9.42993e-05	12.6369	0.000108765	12.6569	8.03833e-05	12.6569	9.46366e-05
12.5999	1.9278e-05	12.5999	0.000141418	12.6279	9.42688e-05	12.6469	0.000108734	12.6669	8.03223e-05	12.6669	9.50843e-05
12.6099	1.92932e-05	12.6099	0.000141418	12.6379	9.43298e-05	12.6569	0.000108734	12.6769	8.03223e-05	12.6769	9.45929e-05
12.6199	1.92902e-05	12.6199	0.000141388	12.6479	9.42688e-05	12.6669	0.000108734	12.6869	8.03223e-05	12.6869	9.50297e-05
12.6299	1.92627e-05	12.6299	0.000141388	12.6579	9.43298e-05	12.6769	0.000108765	12.6969	8.03528e-05	12.6969	9.45274e-05
12.6399	1.92596e-05	12.6399	0.000141388	12.6679	9.43298e-05	12.6869	0.000108673	12.7069	8.02917e-05	12.7069	9.49642e-05
12.6499	1.92535e-05	12.6499	0.000141388	12.6779	9.43604e-05	12.6969	0.000108765	12.7169	8.03223e-05	12.7169	9.44619e-05
12.6599	1.92352e-05	12.6599	0.000141327	12.6879	9.43604e-05	12.7069	0.000108704	12.7269	8.03223e-05	12.7269	9.48768e-05
12.6699	1.92627e-05	12.6699	0.000141357	12.6979	9.43909e-05	12.7169	0.000108765	12.7369	8.03833e-05	12.7369	9.43855e-05
12.6799	1.92291e-05	12.6799	0.000141296	12.7079	9.43604e-05	12.7269	0.000108734	12.7469	8.02917e-05	12.7469	9.48113e-05
12.6899	1.92566e-05	12.6899	0.000141296	12.7179	9.43909e-05	12.7369	0.000108795	12.7569	8.03223e-05	12.7569	9.432e-05
12.6999	1.922e-05	12.6999	0.000141266	12.7279	9.43604e-05	12.7469	0.000108734	12.7669	8.02917e-05	12.7669	9.47458e-05
12.7099	1.92596e-05	12.7099	0.000141296	12.7379	9.43909e-05	12.7569	0.000108795	12.7769	8.03223e-05	12.7769	9.42763e-05
12.7199	1.92169e-05	12.7199	0.000141235	12.7479	9.43604e-05	12.7669	0.000108734	12.7869	8.02917e-05	12.7869	9.47021e-05
12.7299	1.9223e-05	12.7299	0.000141296	12.7579	9.44214e-05	12.7769	0.000108734	12.7969	8.03223e-05	12.7969	9.42326e-05
12.7399	1.922e-05	12.7399	0.000141205	12.7679	9.44214e-05	12.7869	0.000108673	12.8069	8.03223e-05	12.8069	9.46475e-05
12.7499	1.92261e-05	12.7499	0.000141235	12.7779	9.44519e-05	12.7969	0.000108704	12.8169	8.03223e-05	12.8169	9.4178e-05
12.7599	1.92017e-05	12.7599	0.000141174	12.7879	9.44519e-05	12.8069	0.000108643	12.8269	8.03223e-05	12.8269	9.4582e-05
12.7699	1.92078e-05	12.7699	0.000141174	12.7979	9.44824e-05	12.8169	0.000108643	12.8369	8.03223e-05	12.8369	9.41125e-05
12.7799	1.91895e-05	12.7799	0.000141144	12.8079	9.44519e-05	12.8269	0.000108582	12.8469	8.02917e-05	12.8469	9.45056e-05
12.7899	1.91986e-05	12.7899	0.000141144	12.8179	9.44824e-05	12.8369	0.000108612	12.8569	8.02612e-05	12.8569	9.40579e-05
12.7999	1.91864e-05	12.7999	0.000141113	12.8279	9.44519e-05	12.8469	0.000108551	12.8669	8.02612e-05	12.8669	9.44619e-05
12.8099	1.91803e-05	12.8099	0.000141113	12.8379	9.45129e-05	12.8569	0.000108643	12.8769	8.02612e-05	12.8769	9.40142e-05
12.8199	1.91589e-05	12.8199	0.000141052	12.8479	9.45129e-05	12.8669	0.000108582	12.8869	8.02307e-05	12.8869	9.43964e-05
12.8299	1.91925e-05	12.8299	0.000141083	12.8579	9.45435e-05	12.8769	0.000108612	12.8969	8.02612e-05	12.8969	9.39705e-05
12.8399	1.91589e-05	12.8399	0.000141022	12.8679	9.45129e-05	12.8869	0.000108582	12.9069	8.02002e-05	12.9069	9.43527e-05
12.8499	1.91711e-05	12.8499	0.000141083	12.8779	9.46045e-05	12.8969	0.000108643	12.9169	8.02307e-05	12.9169	9.39159e-05
12.8599	1.91406e-05	12.8599	0.000140991	12.8879	9.45435e-05	12.9069	0.000108582	12.9269	8.02307e-05	12.9269	9.42981e-05
12.8699	1.91742e-05	12.8699	0.000141022	12.8979	9.46045e-05	12.9169	0.000108643	12.9369	8.02307e-05	12.9369	9.38941e-05
12.8799	1.91315e-05	12.8799	0.000140961	12.9079	9.45435e-05	12.9269	0.000108612	12.9469	8.02307e-05	12.9469	9.42654e-05
12.8899	1.91589e-05	12.8899	0.000141022	12.9179	9.4574e-05	12.9369	0.000108673	12.9569	8.02307e-05	12.9569	9.38723e-05
12.8999	1.9104e-05	12.8999	0.00014093	12.9279	9.45435e-05	12.9469	0.000108612	12.9669	8.02002e-05	12.9669	9.42544e-05
12.9099	1.91345e-05	12.9099	0.00014093	12.9379	9.46045e-05	12.9569	0.000108612	12.9769	8.02307e-05	12.9769	9.38504e-05
12.9199	1.91284e-05	12.9199	0.00014093	12.9479	9.4574e-05	12.9669	0.000108612	12.9869	8.02307e-05	12.9869	9.41998e-05
12.9299	1.91284e-05	12.9299	0.00014093	12.9579	9.4635e-05	12.9769	0.000108612	12.9969	8.02307e-05	12.9969	9.38068e-05
12.9399	1.91071e-05	12.9399	0.000140839	12.9679	9.46045e-05	12.9869	0.000108551	13.0069	8.02002e-05	13.0069	9.41562e-05
12.9499	1.91162e-05	12.9499	0.00014093	12.9779	9.46655e-05	12.9969	0.000108582	13.0169	8.02307e-05	13.0169	9.37522e-05
12.9599	1.90979e-05	12.9599	0.000140839	12.9879	9.4635e-05	13.0069	0.000108521	13.0269	8.02002e-05	13.0269	9.41016e-05
12.9699	1.90857e-05	12.9699	0.0001409	12.9979	9.46655e-05	13.0169	0.000108582	13.0369	8.02002e-05	13.0369	9.37194e-05
12.9799	1.90796e-05	12.9799	0.000140808	13.0079	9.4635e-05	13.0269	0.000108521	13.0469	8.01697e-05	13.0469	9.40579e-05
12.9899	1.90765e-05	12.9899	0.000140808	13.0179	9.46655e-05	13.0369	0.000108551	13.0569	8.01697e-05	13.0569	9.36648e-05
12.9999	1.90765e-05	12.9999	0.000140778	13.0279	9.4635e-05	13.0469	0.000108551	13.0669	8.01392e-05	13.0669	9.39924e-05
13.0099	1.90857e-05	13.0099	0.000140839	13.0379	9.46655e-05	13.0569	0.000108612	13.0769	8.01697e-05	13.0769	9.36102e-05
13.0199	1.90674e-05	13.0199	0.000140747	13.0479	9.4635e-05	13.0669	0.000108582	13.0869	8.01697e-05	13.0869	9.39487e-05
13.0299	1.90643e-05	13.0299	0.000140778	13.0579	9.4696e-05	13.0769	0.000108643	13.0969	8.02002e-05	13.0969	9.35775e-05
13.0399	1.90582e-05	13.0399	0.000140778	13.0679	9.46655e-05	13.0869	0.000108582	13.1069	8.01697e-05	13.1069	9.38941e-05
13.0499	1.90643e-05	13.0499	0.000140747	13.0779	9.47266e-05	13.0969	0.000108612	13.1169	8.02002e-05	13.1169	9.35447e-05
13.0599	1.90369e-05	13.0599	0.000140686	13.0879	9.4696e-05	13.1069	0.000108551	13.1269	8.02002e-05	13.1269	9.38723e-05
13.0699	1.9046e-05	13.0699	0.000140747	13.0979	9.47266e-05	13.1169	0.000108612	13.1369	8.02307e-05	13.1369	9.35229e-05
13.0799	1.90308e-05	13.0799	0.000140686	13.1079	9.47266e-05	13.1269	0.000108551	13.1469	8.02002e-05	13.1469	9.38286e-05
13.0899	1.90216e-05	13.0899	0.000140717	13.1179	9.47571e-05	13.1369	0.000108521	13.1569	8.02002e-05	13.1569	9.34792e-05
13.0999	1.90277e-05	13.0999	0.000140686	13.1279	9.47266e-05	13.1469	0.00010849	13.1669	8.01697e-05	13.1669	9.3774e-05
13.1099	1.90033e-05	13.1099	0.000140686	13.1379	9.47571e-05	13.1569	0.00010849	13.1769	8.01392e-05	13.1769	9.34246e-05
13.1199	1.90155e-05	13.1199	0.000140625	13.1479	9.47266e-05	13.1669	0.000108459	13.1869	8.01392e-05	13.1869	9.37085e-05
13.1299	1.89941e-05	13.1299	0.000140656	13.1579	9.47571e-05	13.1769	0.00010849	13.1969	8.01392e-05	13.1969	9.337e-05
13.1399	1.89911e-05	13.1399	0.000140625	13.1679	9.47571e-05	13.1869	0.00010849	13.2069	8.01392e-05	13.2069	9.36539e-05
13.1499	1.89941e-05	13.1499	0.000140656	13.1779	9.47876e-05	13.1969	0.000108521	13.2169	8.01392e-05	13.2169	9.33372e-05
13.1599	1.89728e-05	13.1599	0.000140594	13.1879	9.47571e-05	13.2069	0.000108521	13.2269	8.01086e-05	13.2269	9.36211e-05
13.1699	1.90094e-05	13.1699	0.000140594	13.1979	9.48181e-05	13.2169	0.000108551	13.2369	8.01086e-05	13.2369	9.33045e-05
13.1799	1.89819e-05	13.1799	0.000140594	13.2079	9.47571e-05	13.2269	0.00010849	13.2469	8.00781e-05	13.2469	9.35884e-05
13.1899	1.90002e-05	13.1899	0.000140564	13.2179	9.48486e-05	13.2369	0.000108582	13.2569	8.01086e-05	13.2569	9.32936e-05
13.1999	1.89575e-05	13.1999	0.000140564	13.2279	9.47876e-05	13.2469	0.00010849	13.2669	8.01086e-05	13.2669	9.35556e-05
13.2099	1.89941e-05	13.2099	0.000140533	13.2379	9.48486e-05	13.2569	0.000108551	13.2769	8.01086e-05	13.2769	9.32499e-05
13.2199	1.89758e-05	13.2199	0.000140533	13.2479	9.48181e-05	13.2669	0.00010849	13.2869	8.01392e-05	13.2869	9.35119e-05
13.2299	1.89636e-05	13.2299	0.000140503	13.2579	9.48792e-05	13.2769	0.00010849	13.2969	8.01392e-05	13.2969	9.32062e-05
13.2399	1.89484e-05	13.2399	0.000140503	13.2679	9.48181e-05	13.2869	0.000108459	13.3069	8.01392e-05	13.3069	9.34355e-05
13.2499	1.89697e-05	13.2499	0.000140442	13.2779	9.48792e-05	13.2969	0.000108429	13.3169	8.01392e-05	13.3169	9.31516e-05
13.2599	1.89362e-05	13.2599	0.000140442	13.2879	9.48792e-05	13.3069	0.000108398	13.3269	8.01086e-05	13.3269	9.33918e-05
13.2699	1.89697e-05	13.2699	0.000140472	13.2979	9.48792e-05	13.3169	0.000108398	13.3369	8.01392e-05	13.3369	9.31188e-05
13.2799	1.89178e-05	13.2799	0.000140442	13.3079	9.48486e-05	13.3269	0.000108398	13.3469	8.01697e-05	13.3469	9.33482e-05
13.2899	1.89514e-05	13.2899	0.000140411	13.3179	9.48792e-05	13.3369	0.000108398	13.3569	8.01697e-05	13.3569	9.31079e-05
13.2999	1.89209e-05	13.2999	0.000140411	13.3279	9.48486e-05	13.3469	0.000108368	13.3669	8.02002e-05	13.3669	9.33154e-05
13.3099	1.89423e-05	13.3099	0.000140381	13.3379	9.49097e-05	13.3569	0.000108368	13.3769	8.02002e-05	13.3769	9.30752e-05
13.3199	1.88995e-05	13.3199	0.000140381	13.3479	9.48486e-05	13.3669	0.000108398	13.3869	8.02307e-05	13.3869	9.32608e-05
13.3299	1.89484e-05	13.3299	0.000140381	13.3579	9.49402e-05	13.3769	0.000108398	13.3969	8.02002e-05	13.3969	9.30315e-05
13.3399	1.89087e-05	13.3399	0.000140381	13.3679	9.49097e-05	13.3869	0.000108398	13.4069	8.02002e-05	13.4069	9.32171e-05
13.3499	1.8924e-05	13.3499	0.00014035	13.3779	9.49097e-05	13.3969	0.000108429	13.4169	8.01697e-05	13.4169	9.29987e-05
13.3599	1.89117e-05	13.3599	0.000140289	13.3879	9.49097e-05	13.4069	0.000108429	13.4269	8.01392e-05	13.4269	9.31625e-05
13.3699	1.88995e-05	13.3699	0.00014032	13.3979	9.49707e-05	13.4169	0.000108429	13.4369	8.01086e-05	13.4369	9.2966e-05
13.3799	1.88873e-05	13.3799	0.00014035	13.4079	9.49097e-05	13.4269	0.000108429	13.4469	8.01086e-05	13.4469	9.31188e-05
13.3899	1.8924e-05	13.3899	0.00014035	13.4179	9.49402e-05	13.4369	0.000108398	13.4569	8.01086e-05	13.4569	9.29332e-05
13.3999	1.88873e-05	13.3999	0.00014032	13.4279	9.49097e-05	13.4469	0.000108368	13.4669	8.01086e-05	13.4669	9.30752e-05
13.4099	1.88904e-05	13.4099	0.00014032	13.4379	9.49707e-05	13.4569	0.000108368	13.4769	8.00781e-05	13.4769	9.29114e-05
13.4199	1.88721e-05	13.4199	0.00014032	13.4479	9.49402e-05	13.4669	0.000108337	13.4869	8.01086e-05	13.4869	9.30533e-05
13.4299	1.88934e-05	13.4299	0.000140289	13.4579	9.50012e-05	13.4769	0.000108398	13.4969	8.00781e-05	13.4969	9.29114e-05
13.4399	1.88629e-05	13.4399	0.000140259	13.4679	9.50012e-05	13.4869	0.000108368	13.5069	8.01086e-05	13.5069	9.30206e-05
13.4499	1.88782e-05	13.4499	0.000140259	13.4779	9.50012e-05	13.4969	0.000108429	13.5169	8.01392e-05	13.5169	9.28677e-05
13.4599	1.88477e-05	13.4599	0.000140259	13.4879	9.49707e-05	13.5069	0.000108398	13.5269	8.01086e-05	13.5269	9.2966e-05
13.4699	1.88629e-05	13.4699	0.000140259	13.4979	9.49707e-05	13.5169	0.000108429	13.5369	8.01392e-05	13.5369	9.28349e-05
13.4799	1.88538e-05	13.4799	0.000140198	13.5079	9.49707e-05	13.5269	0.000108459	13.5469	8.01086e-05	13.5469	9.29223e-05
13.4899	1.88416e-05	13.4899	0.000140198	13.5179	9.50012e-05	13.5369	0.00010849	13.5569	8.01086e-05	13.5569	9.28022e-05
13.4999	1.88324e-05	13.4999	0.000140228	13.5279	9.50012e-05	13.5469	0.000108459	13.5669	8.01086e-05	13.5669	9.29005e-05
13.5099	1.88568e-05	13.5099	0.000140228	13.5379	9.50317e-05	13.5569	0.000108521	13.5769	8.01392e-05	13.5769	9.27913e-05
13.5199	1.88019e-05	13.5199	0.000140167	13.5479	9.50317e-05	13.5669	0.000108521	13.5869	8.01086e-05	13.5869	9.28568e-05
13.5299	1.88354e-05	13.5299	0.000140167	13.5579	9.50623e-05	13.5769	0.000108521	13.5969	8.01086e-05	13.5969	9.27476e-05
13.5399	1.87714e-05	13.5399	0.000140167	13.5679	9.50317e-05	13.5869	0.00010849	13.6069	8.00781e-05	13.6069	9.28131e-05
13.5499	1.88202e-05	13.5499	0.000140167	13.5779	9.50623e-05	13.5969	0.00010849	13.6169	8.01086e-05	13.6169	9.27148e-05
13.5599	1.87653e-05	13.5599	0.000140106	13.5879	9.50317e-05	13.6069	0.00010849	13.6269	8.00781e-05	13.6269	9.27694e-05
13.5699	1.88171e-05	13.5699	0.000140106	13.5979	9.50623e-05	13.6169	0.00010849	13.6369	8.00781e-05	13.6369	9.26821e-05
13.5799	1.87775e-05	13.5799	0.000140076	13.6079	9.50317e-05	13.6269	0.000108398	13.6469	8.00476e-05	13.6469	9.27367e-05
13.5899	1.88202e-05	13.5899	0.000140076	13.6179	9.50928e-05	13.6369	0.000108429	13.6569	8.00781e-05	13.6569	9.26493e-05
13.5999	1.87439e-05	13.5999	0.000140076	13.6279	9.50317e-05	13.6469	0.000108398	13.6669	8.00781e-05	13.6669	9.2693e-05
13.6099	1.87927e-05	13.6099	0.000140076	13.6379	9.50623e-05	13.6569	0.000108398	13.6769	8.00476e-05	13.6769	9.26275e-05
13.6199	1.87653e-05	13.6199	0.000140076	13.6479	9.50623e-05	13.6669	0.000108337	13.6869	8.00171e-05	13.6869	9.26602e-05
13.6299	1.87531e-05	13.6299	0.000140045	13.6579	9.51233e-05	13.6769	0.000108398	13.6969	8.00476e-05	13.6969	9.25838e-05
13.6399	1.87317e-05	13.6399	0.000140045	13.6679	9.50928e-05	13.6869	0.000108368	13.7069	8.00476e-05	13.7069	9.26166e-05
13.6499	1.87531e-05	13.6499	0.000140045	13.6779	9.51233e-05	13.6969	0.000108398	13.7169	8.00171e-05	13.7169	9.2551e-05
13.6599	1.87347e-05	13.6599	0.000140045	13.6879	9.50928e-05	13.7069	0.000108429	13.7269	8.00171e-05	13.7269	9.2562e-05
13.6699	1.87775e-05	13.6699	0.000140015	13.6979	9.51233e-05	13.7169	0.000108459	13.7369	8.00171e-05	13.7369	9.25074e-05
13.6799	1.87195e-05	13.6799	0.000140015	13.7079	9.50623e-05	13.7269	0.000108429	13.7469	8.00171e-05	13.7469	9.25183e-05
13.6899	1.87653e-05	13.6899	0.000139984	13.7179	9.51233e-05	13.7369	0.00010849	13.7569	7.99866e-05	13.7569	9.24746e-05
13.6999	1.87042e-05	13.6999	0.000139954	13.7279	9.50623e-05	13.7469	0.000108459	13.7669	7.99866e-05	13.7669	9.24855e-05
13.7099	1.87408e-05	13.7099	0.000139954	13.7379	9.51538e-05	13.7569	0.000108459	13.7769	7.99866e-05	13.7769	9.24528e-05
13.7199	1.87073e-05	13.7199	0.000139954	13.7479	9.50928e-05	13.7669	0.000108429	13.7869	7.99866e-05	13.7869	9.24637e-05
13.7299	1.87347e-05	13.7299	0.000139923	13.7579	9.51538e-05	13.7769	0.000108398	13.7969	7.99561e-05	13.7969	9.24528e-05
13.7399	1.86951e-05	13.7399	0.000139923	13.7679	9.51233e-05	13.7869	0.000108398	13.8069	7.99561e-05	13.8069	9.24419e-05
13.7499	1.87195e-05	13.7499	0.000139923	13.7779	9.51538e-05	13.7969	0.000108429	13.8169	7.9895e-05	13.8169	9.24309e-05
13.7599	1.86859e-05	13.7599	0.000139923	13.7879	9.51233e-05	13.8069	0.000108398	13.8269	7.99255e-05	13.8269	9.242e-05
13.7699	1.87134e-05	13.7699	0.000139893	13.7979	9.51843e-05	13.8169	0.000108398	13.8369	7.9895e-05	13.8369	9.23982e-05
13.7799	1.86859e-05	13.7799	0.000139923	13.8079	9.51233e-05	13.8269	0.000108398	13.8469	7.99255e-05	13.8469	9.23654e-05
13.7899	1.87042e-05	13.7899	0.000139893	13.8179	9.51843e-05	13.8369	0.000108398	13.8569	7.99255e-05	13.8569	9.23763e-05
13.7999	1.8689e-05	13.7999	0.000139893	13.8279	9.51538e-05	13.8469	0.000108368	13.8669	7.99255e-05	13.8669	9.23436e-05
13.8099	1.87012e-05	13.8099	0.000139862	13.8379	9.51843e-05	13.8569	0.000108368	13.8769	7.9895e-05	13.8769	9.23327e-05
13.8199	1.86768e-05	13.8199	0.000139893	13.8479	9.51843e-05	13.8669	0.000108398	13.8869	7.9895e-05	13.8869	9.22999e-05
13.8299	1.87103e-05	13.8299	0.000139832	13.8579	9.52148e-05	13.8769	0.000108398	13.8969	7.98645e-05	13.8969	9.23217e-05
13.8399	1.8692e-05	13.8399	0.000139862	13.8679	9.51843e-05	13.8869	0.000108398	13.9069	7.98645e-05	13.9069	9.22562e-05
13.8499	1.87134e-05	13.8499	0.000139801	13.8779	9.52148e-05	13.8969	0.000108429	13.9169	7.9834e-05	13.9169	9.22672e-05
13.8599	1.86737e-05	13.8599	0.000139801	13.8879	9.51843e-05	13.9069	0.000108398	13.9269	7.98645e-05	13.9269	9.22235e-05
13.8699	1.8692e-05	13.8699	0.000139771	13.8979	9.51843e-05	13.9169	0.000108429	13.9369	7.9834e-05	13.9369	9.22453e-05
13.8799	1.86676e-05	13.8799	0.000139801	13.9079	9.51843e-05	13.9269	0.000108429	13.9469	7.9834e-05	13.9469	9.21798e-05
13.8899	1.86951e-05	13.8899	0.000139801	13.9179	9.51843e-05	13.9369	0.000108398	13.9569	7.98035e-05	13.9569	9.22235e-05
13.8999	1.86859e-05	13.8999	0.000139771	13.9279	9.52148e-05	13.9469	0.000108368	13.9669	7.9834e-05	13.9669	9.2158e-05
13.9099	1.86584e-05	13.9099	0.00013974	13.9379	9.52454e-05	13.9569	0.000108398	13.9769	7.98035e-05	13.9769	9.21907e-05
13.9199	1.86859e-05	13.9199	0.000139801	13.9479	9.51843e-05	13.9669	0.000108368	13.9869	7.9834e-05	13.9869	9.21252e-05
13.9299	1.86676e-05	13.9299	0.000139709	13.9579	9.52454e-05	13.9769	0.000108368	13.9969	7.98035e-05	13.9969	9.21798e-05
13.9399	1.86432e-05	13.9399	0.00013974	13.9679	9.52454e-05	13.9869	0.000108429	14.0069	7.9834e-05	14.0069	9.20924e-05
13.9499	1.86584e-05	13.9499	0.00013974	13.9779	9.52759e-05	13.9969	0.000108398	14.0169	7.98035e-05	14.0169	9.2147e-05
13.9599	1.86401e-05	13.9599	0.00013974	13.9879	9.52454e-05	14.0069	0.000108429	14.0269	7.98035e-05	14.0269	9.20706e-05
13.9699	1.86462e-05	13.9699	0.000139709	13.9979	9.52454e-05	14.0169	0.000108429	14.0369	7.98035e-05	14.0369	9.21252e-05
13.9799	1.86401e-05	13.9799	0.000139709	14.0079	9.52148e-05	14.0269	0.000108429	14.0469	7.9834e-05	14.0469	9.2016e-05
13.9899	1.86523e-05	13.9899	0.000139679	14.0179	9.52454e-05	14.0369	0.000108429	14.0569	7.98035e-05	14.0569	9.20924e-05
13.9999	1.86462e-05	13.9999	0.000139709	14.0279	9.52759e-05	14.0469	0.000108398	14.0669	7.9834e-05	14.0669	9.19942e-05
14.0099	1.86432e-05	14.0099	0.000139648	14.0379	9.52454e-05	14.0569	0.000108368	14.0769	7.9834e-05	14.0769	9.20706e-05
14.0199	1.86371e-05	14.0199	0.000139648	14.0479	9.52759e-05	14.0669	0.000108307	14.0869	7.98035e-05	14.0869	9.19614e-05
14.0299	1.86554e-05	14.0299	0.000139648	14.0579	9.52759e-05	14.0769	0.000108307	14.0969	7.97729e-05	14.0969	9.20488e-05
14.0399	1.86584e-05	14.0399	0.000139648	14.0679	9.53064e-05	14.0869	0.000108276	14.1069	7.98035e-05	14.1069	9.19177e-05
14.0499	1.86615e-05	14.0499	0.000139618	14.0779	9.52759e-05	14.0969	0.000108276	14.1169	7.97424e-05	14.1169	9.20051e-05
14.0599	1.86432e-05	14.0599	0.000139648	14.0879	9.53064e-05	14.1069	0.000108337	14.1269	7.97424e-05	14.1269	9.18741e-05
14.0699	1.86218e-05	14.0699	0.000139618	14.0979	9.53064e-05	14.1169	0.000108337	14.1369	7.97729e-05	14.1369	9.19723e-05
14.0799	1.86371e-05	14.0799	0.000139618	14.1079	9.52454e-05	14.1269	0.000108368	14.1469	7.97424e-05	14.1469	9.18304e-05
14.0899	1.86249e-05	14.0899	0.000139557	14.1179	9.52759e-05	14.1369	0.000108337	14.1569	7.97729e-05	14.1569	9.19505e-05
14.0999	1.86462e-05	14.0999	0.000139648	14.1279	9.53064e-05	14.1469	0.000108368	14.1669	7.97424e-05	14.1669	9.18085e-05
14.1099	1.85944e-05	14.1099	0.000139557	14.1379	9.53064e-05	14.1569	0.000108368	14.1769	7.97119e-05	14.1769	9.19177e-05
14.1199	1.86371e-05	14.1199	0.000139587	14.1479	9.53064e-05	14.1669	0.000108398	14.1869	7.97119e-05	14.1869	9.17649e-05
14.1299	1.86096e-05	14.1299	0.000139496	14.1579	9.53369e-05	14.1769	0.000108398	14.1969	7.97119e-05	14.1969	9.19068e-05
14.1399	1.86249e-05	14.1399	0.000139557	14.1679	9.53369e-05	14.1869	0.000108429	14.2069	7.97424e-05	14.2069	9.1743e-05
14.1499	1.86066e-05	14.1499	0.000139465	14.1779	9.53064e-05	14.1969	0.000108429	14.2169	7.97119e-05	14.2169	9.1885e-05
14.1599	1.86157e-05	14.1599	0.000139496	14.1879	9.53064e-05	14.2069	0.000108459	14.2269	7.97424e-05	14.2269	9.17103e-05
14.1699	1.85974e-05	14.1699	0.000139465	14.1979	9.53064e-05	14.2169	0.000108459	14.2369	7.97424e-05	14.2369	9.18631e-05
14.1799	1.86096e-05	14.1799	0.000139496	14.2079	9.53064e-05	14.2269	0.000108429	14.2469	7.97119e-05	14.2469	9.16775e-05
14.1899	1.86035e-05	14.1899	0.000139435	14.2179	9.53369e-05	14.2369	0.000108398	14.2569	7.97119e-05	14.2569	9.18522e-05
14.1999	1.85974e-05	14.1999	0.000139526	14.2279	9.53064e-05	14.2469	0.000108398	14.2669	7.97119e-05	14.2669	9.16557e-05
14.2099	1.86005e-05	14.2099	0.000139435	14.2379	9.53674e-05	14.2569	0.000108368	14.2769	7.97119e-05	14.2769	9.18522e-05
14.2199	1.85608e-05	14.2199	0.000139496	14.2479	9.53674e-05	14.2669	0.000108337	14.2869	7.97119e-05	14.2869	9.16448e-05
14.2299	1.85974e-05	14.2299	0.000139404	14.2579	9.53674e-05	14.2769	0.000108337	14.2969	7.96814e-05	14.2969	9.18304e-05
14.2399	1.8573e-05	14.2399	0.000139526	14.2679	9.53674e-05	14.2869	0.000108368	14.3069	7.96814e-05	14.3069	9.15902e-05
14.2499	1.8576e-05	14.2499	0.000139435	14.2779	9.53674e-05	14.2969	0.000108337	14.3169	7.96509e-05	14.3169	9.17867e-05
14.2599	1.85852e-05	14.2599	0.000139465	14.2879	9.53369e-05	14.3069	0.000108337	14.3269	7.96509e-05	14.3269	9.15574e-05
14.2699	1.86066e-05	14.2699	0.000139404	14.2979	9.53674e-05	14.3169	0.000108368	14.3369	7.95898e-05	14.3369	9.17649e-05
14.2799	1.85608e-05	14.2799	0.000139465	14.3079	9.53369e-05	14.3269	0.000108398	14.3469	7.96509e-05	14.3469	9.15356e-05
14.2899	1.85486e-05	14.2899	0.000139374	14.3179	9.53674e-05	14.3369	0.000108429	14.3569	7.95898e-05	14.3569	9.17758e-05
14.2999	1.8576e-05	14.2999	0.000139404	14.3279	9.53674e-05	14.3469	0.000108429	14.3669	7.95898e-05	14.3669	9.15246e-05
14.3099	1.85791e-05	14.3099	0.000139374	14.3379	9.53979e-05	14.3569	0.000108429	14.3769	7.95288e-05	14.3769	9.1743e-05
14.3199	1.85455e-05	14.3199	0.000139404	14.3479	9.53979e-05	14.3669	0.000108459	14.3869	7.95288e-05	14.3869	9.1481e-05
14.3299	1.85211e-05	14.3299	0.000139374	14.3579	9.53979e-05	14.3769	0.00010849	14.3969	7.94983e-05	14.3969	9.17212e-05
14.3399	1.8573e-05	14.3399	0.000139404	14.3679	9.53979e-05	14.3869	0.00010849	14.4069	7.94983e-05	14.4069	9.14373e-05
14.3499	1.85516e-05	14.3499	0.000139374	14.3779	9.53979e-05	14.3969	0.00010849	14.4169	7.94678e-05	14.4169	9.16884e-05
14.3599	1.85547e-05	14.3599	0.000139404	14.3879	9.54285e-05	14.4069	0.000108459	14.4269	7.94983e-05	14.4269	9.14045e-05
14.3699	1.85425e-05	14.3699	0.000139343	14.3979	9.54285e-05	14.4169	0.000108459	14.4369	7.94983e-05	14.4369	9.16666e-05
14.3799	1.85272e-05	14.3799	0.000139343	14.4079	9.54285e-05	14.4269	0.000108429	14.4469	7.94678e-05	14.4469	9.13609e-05
14.3899	1.85333e-05	14.3899	0.000139374	14.4179	9.54285e-05	14.4369	0.000108398	14.4569	7.94678e-05	14.4569	9.16338e-05
14.3999	1.85394e-05	14.3999	0.000139374	14.4279	9.5459e-05	14.4469	0.000108368	14.4669	7.94983e-05	14.4669	9.13172e-05
14.4099	1.85272e-05	14.4099	0.000139282	14.4379	9.54285e-05	14.4569	0.000108368	14.4769	7.94373e-05	14.4769	9.16011e-05
14.4199	1.85394e-05	14.4199	0.000139374	14.4479	9.5459e-05	14.4669	0.000108337	14.4869	7.94678e-05	14.4869	9.12735e-05
14.4299	1.85059e-05	14.4299	0.000139282	14.4579	9.5459e-05	14.4769	0.000108368	14.4969	7.94067e-05	14.4969	9.15792e-05
14.4399	1.85211e-05	14.4399	0.000139343	14.4679	9.5459e-05	14.4869	0.000108368	14.5069	7.94373e-05	14.5069	9.12517e-05
14.4499	1.85089e-05	14.4499	0.000139282	14.4779	9.5459e-05	14.4969	0.000108368	14.5169	7.94067e-05	14.5169	9.15792e-05
14.4599	1.85303e-05	14.4599	0.000139313	14.4879	9.54895e-05	14.5069	0.000108398	14.5269	7.94067e-05	14.5269	9.12298e-05
14.4699	1.8512e-05	14.4699	0.000139252	14.4979	9.5459e-05	14.5169	0.000108398	14.5369	7.93762e-05	14.5369	9.15574e-05
14.4799	1.84998e-05	14.4799	0.000139282	14.5079	9.5459e-05	14.5269	0.000108398	14.5469	7.93762e-05	14.5469	9.1208e-05
14.4899	1.84937e-05	14.4899	0.000139252	14.5179	9.5459e-05	14.5369	0.000108429	14.5569	7.93152e-05	14.5569	9.15465e-05
14.4999	1.84906e-05	14.4999	0.000139313	14.5279	9.54285e-05	14.5469	0.000108368	14.5669	7.93457e-05	14.5669	9.11752e-05
14.5099	1.84906e-05	14.5099	0.000139221	14.5379	9.5459e-05	14.5569	0.000108398	14.5769	7.93152e-05	14.5769	9.15137e-05
14.5199	1.84967e-05	14.5199	0.000139282	14.5479	9.54895e-05	14.5669	0.000108368	14.5869	7.93152e-05	14.5869	9.11534e-05
14.5299	1.84631e-05	14.5299	0.000139221	14.5579	9.5459e-05	14.5769	0.000108337	14.5969	7.92847e-05	14.5969	9.15028e-05
14.5399	1.84937e-05	14.5399	0.000139252	14.5679	9.54895e-05	14.5869	0.000108307	14.6069	7.93457e-05	14.6069	9.11316e-05
14.5499	1.84875e-05	14.5499	0.000139221	14.5779	9.54895e-05	14.5969	0.000108276	14.6169	7.92847e-05	14.6169	9.1481e-05
14.5599	1.84662e-05	14.5599	0.000139282	14.5879	9.552e-05	14.6069	0.000108307	14.6269	7.93152e-05	14.6269	9.10879e-05
14.5699	1.84692e-05	14.5699	0.000139191	14.5979	9.5459e-05	14.6169	0.000108307	14.6369	7.92847e-05	14.6369	9.14264e-05
14.5799	1.84692e-05	14.5799	0.000139252	14.6079	9.54895e-05	14.6269	0.000108337	14.6469	7.93152e-05	14.6469	9.10224e-05
14.5899	1.84601e-05	14.5899	0.00013916	14.6179	9.5459e-05	14.6369	0.000108307	14.6569	7.93152e-05	14.6569	9.13827e-05
14.5999	1.84631e-05	14.5999	0.000139252	14.6279	9.54895e-05	14.6469	0.000108368	14.6669	7.93457e-05	14.6669	9.09787e-05
14.6099	1.84784e-05	14.6099	0.00013916	14.6379	9.54285e-05	14.6569	0.000108337	14.6769	7.93152e-05	14.6769	9.13499e-05
14.6199	1.84631e-05	14.6199	0.000139252	14.6479	9.54895e-05	14.6669	0.000108398	14.6869	7.93152e-05	14.6869	9.09459e-05
14.6299	1.84509e-05	14.6299	0.00013916	14.6579	9.54895e-05	14.6769	0.000108368	14.6969	7.92847e-05	14.6969	9.13172e-05
14.6399	1.84479e-05	14.6399	0.000139252	14.6679	9.552e-05	14.6869	0.000108368	14.7069	7.92542e-05	14.7069	9.08913e-05
14.6499	1.8457e-05	14.6499	0.000139191	14.6779	9.54895e-05	14.6969	0.000108337	14.7169	7.92236e-05	14.7169	9.12517e-05
14.6599	1.84509e-05	14.6599	0.000139252	14.6879	9.552e-05	14.7069	0.000108368	14.7269	7.92236e-05	14.7269	9.08258e-05
14.6699	1.8454e-05	14.6699	0.00013913	14.6979	9.54895e-05	14.7169	0.000108368	14.7369	7.91931e-05	14.7369	9.12189e-05
14.6799	1.84021e-05	14.6799	0.000139221	14.7079	9.552e-05	14.7269	0.000108368	14.7469	7.91626e-05	14.7469	9.07821e-05
14.6899	1.84418e-05	14.6899	0.00013916	14.7179	9.5459e-05	14.7369	0.000108337	14.7569	7.91016e-05	14.7569	9.11534e-05
14.6999	1.84326e-05	14.6999	0.000139191	14.7279	9.552e-05	14.7469	0.000108368	14.7669	7.91016e-05	14.7669	9.07385e-05
14.7099	1.84326e-05	14.7099	0.00013916	14.7379	9.552e-05	14.7569	0.000108337	14.7769	7.90405e-05	14.7769	9.11316e-05
14.7199	1.84357e-05	14.7199	0.000139191	14.7479	9.552e-05	14.7669	0.000108368	14.7869	7.9071e-05	14.7869	9.06729e-05
14.7299	1.84479e-05	14.7299	0.000139099	14.7579	9.552e-05	14.7769	0.000108307	14.7969	7.90405e-05	14.7969	9.1077e-05
14.7399	1.84174e-05	14.7399	0.00013916	14.7679	9.552e-05	14.7869	0.000108368	14.8069	7.9071e-05	14.8069	9.06293e-05
14.7499	1.84326e-05	14.7499	0.000139069	14.7779	9.552e-05	14.7969	0.000108307	14.8169	7.901e-05	14.8169	9.10224e-05
14.7599	1.8396e-05	14.7599	0.000139191	14.7879	9.55505e-05	14.8069	0.000108368	14.8269	7.90405e-05	14.8269	9.05856e-05
14.7699	1.84296e-05	14.7699	0.000139069	14.7979	9.552e-05	14.8169	0.000108368	14.8369	7.901e-05	14.8369	9.09896e-05
14.7799	1.84113e-05	14.7799	0.00013913	14.8079	9.552e-05	14.8269	0.000108429	14.8469	7.90405e-05	14.8469	9.05419e-05
14.7899	1.84204e-05	14.7899	0.000139069	14.8179	9.54895e-05	14.8369	0.000108398	14.8569	7.901e-05	14.8569	9.09568e-05
14.7999	1.83777e-05	14.7999	0.00013913	14.8279	9.55505e-05	14.8469	0.000108459	14.8669	7.9071e-05	14.8669	9.05092e-05
14.8099	1.84082e-05	14.8099	0.000139099	14.8379	9.552e-05	14.8569	0.000108429	14.8769	7.90405e-05	14.8769	9.0935e-05
14.8199	1.84143e-05	14.8199	0.00013916	14.8479	9.55505e-05	14.8669	0.000108429	14.8869	7.90405e-05	14.8869	9.04982e-05
14.8299	1.84113e-05	14.8299	0.000139069	14.8579	9.552e-05	14.8769	0.000108368	14.8969	7.90405e-05	14.8969	9.09241e-05
14.8399	1.83807e-05	14.8399	0.00013913	14.8679	9.55505e-05	14.8869	0.000108398	14.9069	7.9071e-05	14.9069	9.04764e-05
14.8499	1.8399e-05	14.8499	0.000139069	14.8779	9.55505e-05	14.8969	0.000108337	14.9169	7.901e-05	14.9169	9.09241e-05
14.8599	1.83655e-05	14.8599	0.00013913	14.8879	9.55811e-05	14.9069	0.000108398	14.9269	7.901e-05	14.9269	9.04655e-05
14.8699	1.83807e-05	14.8699	0.000139038	14.8979	9.55505e-05	14.9169	0.000108307	14.9369	7.89795e-05	14.9369	9.09023e-05
14.8799	1.83716e-05	14.8799	0.000139099	14.9079	9.55505e-05	14.9269	0.000108368	14.9469	7.89795e-05	14.9469	9.04436e-05
14.8899	1.83594e-05	14.8899	0.000139038	14.9179	9.552e-05	14.9369	0.000108337	14.9569	7.8949e-05	14.9569	9.08913e-05
14.8999	1.83472e-05	14.8999	0.000139069	14.9279	9.55505e-05	14.9469	0.000108398	14.9669	7.89795e-05	14.9669	9.04218e-05
14.9099	1.83655e-05	14.9099	0.000139038	14.9379	9.55505e-05	14.9569	0.000108368	14.9769	7.8949e-05	14.9769	9.08586e-05
14.9199	1.83533e-05	14.9199	0.000139069	14.9479	9.55811e-05	14.9669	0.000108459	14.9869	7.89795e-05	14.9869	9.03781e-05
14.9299	1.83594e-05	14.9299	0.000139038	14.9579	9.55505e-05	14.9769	0.000108368	14.9969	7.89795e-05	14.9969	9.08149e-05
14.9399	1.83472e-05	14.9399	0.000139069	14.9679	9.55811e-05	14.9869	0.000108429	15.0069	7.89795e-05	15.0069	9.03345e-05
14.9499	1.83563e-05	14.9499	0.000138977	14.9779	9.55505e-05	14.9969	0.000108398	15.0169	7.8949e-05	15.0169	9.07821e-05
14.9599	1.83167e-05	14.9599	0.000139038	14.9879	9.56421e-05	15.0069	0.00010849	15.0269	7.901e-05	15.0269	9.03017e-05
14.9699	1.83502e-05	14.9699	0.000139008	14.9979	9.55811e-05	15.0169	0.000108459	15.0369	7.89795e-05	15.0369	9.07494e-05
14.9799	1.83441e-05	14.9799	0.000139069	15.0079	9.56116e-05	15.0269	0.00010849	15.0469	7.901e-05	15.0469	9.0258e-05
14.9899	1.8338e-05	14.9899	0.000138947	15.0179	9.55505e-05	15.0369	0.000108429	15.0569	7.8949e-05	15.0569	9.07275e-05
14.9999	1.83197e-05	14.9999	0.000139008	15.0279	9.55811e-05	15.0469	0.00010849	15.0669	7.89795e-05	15.0669	9.02362e-05
15.0099	1.83105e-05	15.0099	0.000139008	15.0379	9.55505e-05	15.0569	0.000108429	15.0769	7.8949e-05	15.0769	9.06948e-05
15.0199	1.83411e-05	15.0199	0.000139038	15.0479	9.55811e-05	15.0669	0.00010849	15.0869	7.8949e-05	15.0869	9.02034e-05
15.0299	1.8335e-05	15.0299	0.000138977	15.0579	9.55505e-05	15.0769	0.000108398	15.0969	7.89185e-05	15.0969	9.06839e-05
15.0399	1.8338e-05	15.0399	0.000139008	15.0679	9.55811e-05	15.0869	0.00010849	15.1069	7.89795e-05	15.1069	9.01816e-05
15.0499	1.83228e-05	15.0499	0.000138947	15.0779	9.55811e-05	15.0969	0.000108398	15.1169	7.8949e-05	15.1169	9.0662e-05
15.0599	1.83075e-05	15.0599	0.000139008	15.0879	9.56116e-05	15.1069	0.000108459	15.1269	7.901e-05	15.1269	9.01597e-05
15.0699	1.83197e-05	15.0699	0.000138947	15.0979	9.55811e-05	15.1169	0.000108429	15.1369	7.901e-05	15.1369	9.06511e-05
15.0799	1.82922e-05	15.0799	0.000138977	15.1079	9.56116e-05	15.1269	0.000108459	15.1469	7.90405e-05	15.1469	9.0127e-05
15.0899	1.82953e-05	15.0899	0.000138947	15.1179	9.55505e-05	15.1369	0.000108459	15.1569	7.901e-05	15.1569	9.06184e-05
15.0999	1.82892e-05	15.0999	0.000138947	15.1279	9.56116e-05	15.1469	0.000108521	15.1669	7.90405e-05	15.1669	9.00942e-05
15.1099	1.828e-05	15.1099	0.000138977	15.1379	9.55811e-05	15.1569	0.000108459	15.1769	7.901e-05	15.1769	9.05856e-05
15.1199	1.82617e-05	15.1199	0.000138977	15.1479	9.56116e-05	15.1669	0.000108521	15.1869	7.901e-05	15.1869	9.00506e-05
15.1299	1.82892e-05	15.1299	0.000138916	15.1579	9.56116e-05	15.1769	0.000108521	15.1969	7.90405e-05	15.1969	9.05638e-05
15.1399	1.82892e-05	15.1399	0.000138977	15.1679	9.56421e-05	15.1869	0.000108521	15.2069	7.90405e-05	15.2069	9.00287e-05
15.1499	1.82739e-05	15.1499	0.000138916	15.1779	9.56116e-05	15.1969	0.00010849	15.2169	7.90405e-05	15.2169	9.0531e-05
15.1599	1.8277e-05	15.1599	0.000138916	15.1879	9.56726e-05	15.2069	0.000108521	15.2269	7.90405e-05	15.2269	8.9996e-05
15.1699	1.82739e-05	15.1699	0.000138885	15.1979	9.56421e-05	15.2169	0.000108459	15.2369	7.90405e-05	15.2369	9.05092e-05
15.1799	1.8277e-05	15.1799	0.000138916	15.2079	9.56726e-05	15.2269	0.000108459	15.2469	7.9071e-05	15.2469	8.99632e-05
15.1899	1.82709e-05	15.1899	0.000138885	15.2179	9.56421e-05	15.2369	0.000108429	15.2569	7.90405e-05	15.2569	9.04764e-05
15.1999	1.82617e-05	15.1999	0.000138916	15.2279	9.56726e-05	15.2469	0.00010849	15.2669	7.9071e-05	15.2669	8.99414e-05
15.2099	1.82617e-05	15.2099	0.000138855	15.2379	9.56116e-05	15.2569	0.000108459	15.2769	7.901e-05	15.2769	9.04655e-05
15.2199	1.82678e-05	15.2199	0.000138947	15.2479	9.56421e-05	15.2669	0.000108521	15.2869	7.90405e-05	15.2869	8.99304e-05
15.2299	1.82373e-05	15.2299	0.000138855	15.2579	9.56421e-05	15.2769	0.00010849	15.2969	7.89795e-05	15.2969	9.04546e-05
15.2399	1.82556e-05	15.2399	0.000138916	15.2679	9.56726e-05	15.2869	0.000108521	15.3069	7.89795e-05	15.3069	8.99086e-05
15.2499	1.82373e-05	15.2499	0.000138855	15.2779	9.56421e-05	15.2969	0.000108521	15.3169	7.89185e-05	15.3169	9.04327e-05
15.2599	1.82434e-05	15.2599	0.000138916	15.2879	9.56726e-05	15.3069	0.000108551	15.3269	7.89185e-05	15.3269	8.98868e-05
15.2699	1.82373e-05	15.2699	0.000138885	15.2979	9.56421e-05	15.3169	0.000108521	15.3369	7.89185e-05	15.3369	9.04109e-05
15.2799	1.82373e-05	15.2799	0.000138916	15.3079	9.56726e-05	15.3269	0.000108551	15.3469	7.89185e-05	15.3469	8.9854e-05
15.2899	1.82373e-05	15.2899	0.000138824	15.3179	9.56726e-05	15.3369	0.000108521	15.3569	7.88879e-05	15.3569	9.03781e-05
15.2999	1.8219e-05	15.2999	0.000138916	15.3279	9.57031e-05	15.3469	0.000108521	15.3669	7.89185e-05	15.3669	8.98213e-05
15.3099	1.8222e-05	15.3099	0.000138855	15.3379	9.56116e-05	15.3569	0.00010849	15.3769	7.89185e-05	15.3769	9.03563e-05
15.3199	1.82251e-05	15.3199	0.000138885	15.3479	9.56421e-05	15.3669	0.00010849	15.3869	7.89185e-05	15.3869	8.98103e-05
15.3299	1.82037e-05	15.3299	0.000138824	15.3579	9.56116e-05	15.3769	0.000108459	15.3969	7.89185e-05	15.3969	9.03563e-05
15.3399	1.8222e-05	15.3399	0.000138855	15.3679	9.56421e-05	15.3869	0.000108429	15.4069	7.8949e-05	15.4069	8.97994e-05
15.3499	1.82098e-05	15.3499	0.000138824	15.3779	9.56421e-05	15.3969	0.000108429	15.4169	7.89185e-05	15.4169	9.03345e-05
15.3599	1.82281e-05	15.3599	0.000138885	15.3879	9.56726e-05	15.4069	0.000108429	15.4269	7.8949e-05	15.4269	8.97776e-05
15.3699	1.82129e-05	15.3699	0.000138794	15.3979	9.56421e-05	15.4169	0.000108459	15.4369	7.89185e-05	15.4369	9.03126e-05
15.3799	1.82068e-05	15.3799	0.000138855	15.4079	9.57031e-05	15.4269	0.000108459	15.4469	7.8949e-05	15.4469	8.97448e-05
15.3899	1.81885e-05	15.3899	0.000138794	15.4179	9.56726e-05	15.4369	0.000108459	15.4569	7.89185e-05	15.4569	9.02908e-05
15.3999	1.82098e-05	15.3999	0.000138855	15.4279	9.57336e-05	15.4469	0.00010849	15.4669	7.8949e-05	15.4669	8.97339e-05
15.4099	1.81885e-05	15.4099	0.000138794	15.4379	9.56726e-05	15.4569	0.000108459	15.4769	7.88879e-05	15.4769	9.02908e-05
15.4199	1.81976e-05	15.4199	0.000138794	15.4479	9.56726e-05	15.4669	0.000108551	15.4869	7.88879e-05	15.4869	8.9723e-05
15.4299	1.81793e-05	15.4299	0.000138763	15.4579	9.56726e-05	15.4769	0.000108521	15.4969	7.88574e-05	15.4969	9.02689e-05
15.4399	1.81763e-05	15.4399	0.000138824	15.4679	9.57031e-05	15.4869	0.000108551	15.5069	7.88574e-05	15.5069	8.97011e-05
15.4499	1.81793e-05	15.4499	0.000138763	15.4779	9.56421e-05	15.4969	0.00010849	15.5169	7.88269e-05	15.5169	9.02471e-05
15.4599	1.81854e-05	15.4599	0.000138763	15.4879	9.57031e-05	15.5069	0.000108521	15.5269	7.87964e-05	15.5269	8.96575e-05
15.4699	1.8158e-05	15.4699	0.000138733	15.4979	9.56726e-05	15.5169	0.000108459	15.5369	7.87964e-05	15.5369	9.02143e-05
15.4799	1.81732e-05	15.4799	0.000138733	15.5079	9.57336e-05	15.5269	0.00010849	15.5469	7.87659e-05	15.5469	8.96465e-05
15.4899	1.81488e-05	15.4899	0.000138733	15.5179	9.57031e-05	15.5369	0.000108429	15.5569	7.87659e-05	15.5569	9.01925e-05
15.4999	1.81641e-05	15.4999	0.000138763	15.5279	9.57642e-05	15.5469	0.000108459	15.5669	7.87354e-05	15.5669	8.96247e-05
15.5099	1.81763e-05	15.5099	0.000138702	15.5379	9.57031e-05	15.5569	0.000108368	15.5769	7.87354e-05	15.5769	9.01816e-05
15.5199	1.81488e-05	15.5199	0.000138763	15.5479	9.57031e-05	15.5669	0.000108459	15.5869	7.87354e-05	15.5869	8.96138e-05
15.5299	1.8158e-05	15.5299	0.000138733	15.5579	9.56726e-05	15.5769	0.000108368	15.5969	7.87354e-05	15.5969	9.01707e-05
15.5399	1.81549e-05	15.5399	0.000138763	15.5679	9.57031e-05	15.5869	0.000108429	15.6069	7.87659e-05	15.6069	8.96029e-05
15.5499	1.81274e-05	15.5499	0.000138733	15.5779	9.56726e-05	15.5969	0.000108368	15.6169	7.87354e-05	15.6169	9.01597e-05
15.5599	1.8158e-05	15.5599	0.000138763	15.5879	9.57336e-05	15.6069	0.00010849	15.6269	7.87659e-05	15.6269	8.9581e-05
15.5699	1.81488e-05	15.5699	0.000138733	15.5979	9.57031e-05	15.6169	0.000108429	15.6369	7.87354e-05	15.6369	9.0127e-05
15.5799	1.81488e-05	15.5799	0.000138733	15.6079	9.57336e-05	15.6269	0.000108521	15.6469	7.87354e-05	15.6469	8.95483e-05
15.5899	1.81244e-05	15.5899	0.000138702	15.6179	9.57031e-05	15.6369	0.000108459	15.6569	7.87354e-05	15.6569	9.01161e-05
15.5999	1.81488e-05	15.5999	0.000138794	15.6279	9.57336e-05	15.6469	0.000108521	15.6669	7.87354e-05	15.6669	8.95374e-05
15.6099	1.81458e-05	15.6099	0.000138702	15.6379	9.57031e-05	15.6569	0.00010849	15.6769	7.87048e-05	15.6769	9.01052e-05
15.6199	1.81396e-05	15.6199	0.000138763	15.6479	9.57336e-05	15.6669	0.000108551	15.6869	7.87048e-05	15.6869	8.95374e-05
15.6299	1.81e-05	15.6299	0.000138702	15.6579	9.57031e-05	15.6769	0.000108521	15.6969	7.86743e-05	15.6969	9.01161e-05
15.6399	1.81335e-05	15.6399	0.000138733	15.6679	9.56726e-05	15.6869	0.000108521	15.7069	7.86438e-05	15.7069	8.95264e-05
15.6499	1.81213e-05	15.6499	0.000138733	15.6779	9.57031e-05	15.6969	0.000108459	15.7169	7.86438e-05	15.7169	9.01052e-05
15.6599	1.81335e-05	15.6599	0.000138763	15.6879	9.57336e-05	15.7069	0.000108521	15.7269	7.86438e-05	15.7269	8.95264e-05
15.6699	1.80847e-05	15.6699	0.000138733	15.6979	9.57031e-05	15.7169	0.000108429	15.7369	7.86133e-05	15.7369	9.00942e-05
15.6799	1.81274e-05	15.6799	0.000138702	15.7079	9.57336e-05	15.7269	0.000108459	15.7469	7.86133e-05	15.7469	8.94937e-05
15.6899	1.80908e-05	15.6899	0.000138702	15.7179	9.57031e-05	15.7369	0.000108368	15.7569	7.86133e-05	15.7569	9.00724e-05
15.6999	1.81183e-05	15.6999	0.000138702	15.7279	9.57642e-05	15.7469	0.000108459	15.7669	7.86438e-05	15.7669	8.94609e-05
15.7099	1.8103e-05	15.7099	0.000138733	15.7379	9.57336e-05	15.7569	0.000108398	15.7769	7.86133e-05	15.7769	9.00396e-05
15.7199	1.80939e-05	15.7199	0.000138702	15.7479	9.57642e-05	15.7669	0.000108459	15.7869	7.86133e-05	15.7869	8.945e-05
15.7299	1.81e-05	15.7299	0.000138733	15.7579	9.57031e-05	15.7769	0.000108459	15.7969	7.86133e-05	15.7969	9.00287e-05
15.7399	1.81e-05	15.7399	0.000138672	15.7679	9.57336e-05	15.7869	0.00010849	15.8069	7.86133e-05	15.8069	8.94282e-05
15.7499	1.80817e-05	15.7499	0.000138702	15.7779	9.57336e-05	15.7969	0.00010849	15.8169	7.86133e-05	15.8169	9.00069e-05
15.7599	1.81091e-05	15.7599	0.000138702	15.7879	9.57642e-05	15.8069	0.000108551	15.8269	7.86133e-05	15.8269	8.94063e-05
15.7699	1.80756e-05	15.7699	0.000138702	15.7979	9.57336e-05	15.8169	0.000108551	15.8369	7.85828e-05	15.8369	8.99741e-05
15.7799	1.81e-05	15.7799	0.000138672	15.8079	9.57642e-05	15.8269	0.000108612	15.8469	7.85828e-05	15.8469	8.93845e-05
15.7899	1.80664e-05	15.7899	0.000138672	15.8179	9.57336e-05	15.8369	0.000108551	15.8569	7.85828e-05	15.8569	8.99632e-05
15.7999	1.80695e-05	15.7999	0.000138672	15.8279	9.58252e-05	15.8469	0.000108612	15.8669	7.86133e-05	15.8669	8.93845e-05
15.8099	1.80725e-05	15.8099	0.000138672	15.8379	9.57642e-05	15.8569	0.000108551	15.8769	7.86438e-05	15.8769	8.99632e-05
15.8199	1.80786e-05	15.8199	0.000138641	15.8479	9.57642e-05	15.8669	0.000108643	15.8869	7.86438e-05	15.8869	8.93736e-05
15.8299	1.80511e-05	15.8299	0.000138672	15.8579	9.57336e-05	15.8769	0.000108551	15.8969	7.86438e-05	15.8969	8.99414e-05
15.8399	1.80664e-05	15.8399	0.000138672	15.8679	9.57642e-05	15.8869	0.000108643	15.9069	7.86438e-05	15.9069	8.93517e-05
15.8499	1.8042e-05	15.8499	0.000138641	15.8779	9.57336e-05	15.8969	0.000108612	15.9169	7.86438e-05	15.9169	8.99195e-05
15.8599	1.80664e-05	15.8599	0.000138641	15.8879	9.57642e-05	15.9069	0.000108643	15.9269	7.86438e-05	15.9269	8.93299e-05
15.8699	1.80511e-05	15.8699	0.000138672	15.8979	9.57336e-05	15.9169	0.000108612	15.9369	7.86438e-05	15.9369	8.98977e-05
15.8799	1.80511e-05	15.8799	0.000138641	15.9079	9.57947e-05	15.9269	0.000108673	15.9469	7.86438e-05	15.9469	8.9319e-05
15.8899	1.80542e-05	15.8899	0.000138641	15.9179	9.57642e-05	15.9369	0.000108673	15.9569	7.86438e-05	15.9569	8.98868e-05
15.8999	1.80511e-05	15.8999	0.000138641	15.9279	9.57947e-05	15.9469	0.000108734	15.9669	7.86743e-05	15.9669	8.92971e-05
15.9099	1.80695e-05	15.9099	0.000138611	15.9379	9.57642e-05	15.9569	0.000108734	15.9769	7.86438e-05	15.9769	8.9854e-05
15.9199	1.80542e-05	15.9199	0.000138641	15.9479	9.57947e-05	15.9669	0.000108765	15.9869	7.86743e-05	15.9869	8.92753e-05
15.9299	1.8042e-05	15.9299	0.000138611	15.9579	9.57947e-05	15.9769	0.000108734	15.9969	7.86743e-05	15.9969	8.98213e-05
15.9399	1.80634e-05	15.9399	0.000138641	15.9679	9.57947e-05	15.9869	0.000108765	16.0069	7.86438e-05	16.0069	8.92316e-05
15.9499	1.80206e-05	15.9499	0.000138611	15.9779	9.57642e-05	15.9969	0.000108673	16.0169	7.86438e-05	16.0169	8.97885e-05
15.9599	1.8042e-05	15.9599	0.000138672	15.9879	9.58252e-05	16.0069	0.000108734	16.0269	7.86438e-05	16.0269	8.92207e-05
15.9699	1.80206e-05	15.9699	0.000138611	15.9979	9.57642e-05	16.0169	0.000108643	16.0369	7.85828e-05	16.0369	8.97776e-05
15.9799	1.80389e-05	15.9799	0.000138611	16.0079	9.58252e-05	16.0269	0.000108673	16.0469	7.85828e-05	16.0469	8.92207e-05
15.9899	1.80206e-05	15.9899	0.000138611	16.0179	9.57947e-05	16.0369	0.000108612	16.0569	7.85522e-05	16.0569	8.97776e-05
15.9999	1.8045e-05	15.9999	0.000138611	16.0279	9.58252e-05	16.0469	0.000108673	16.0669	7.85217e-05	16.0669	8.92098e-05
16.0099	1.80145e-05	16.0099	0.00013858	16.0379	9.57947e-05	16.0569	0.000108612	16.0769	7.85217e-05	16.0769	8.97557e-05
16.0199	1.80328e-05	16.0199	0.000138611	16.0479	9.58252e-05	16.0669	0.000108704	16.0869	7.85522e-05	16.0869	8.91879e-05
16.0299	1.79993e-05	16.0299	0.00013855	16.0579	9.57947e-05	16.0769	0.000108643	16.0969	7.84912e-05	16.0969	8.9723e-05
16.0399	1.80328e-05	16.0399	0.00013858	16.0679	9.58252e-05	16.0869	0.000108734	16.1069	7.84912e-05	16.1069	8.91661e-05
16.0499	1.79932e-05	16.0499	0.00013855	16.0779	9.57947e-05	16.0969	0.000108704	16.1169	7.84607e-05	16.1169	8.97011e-05
16.0599	1.80267e-05	16.0599	0.00013855	16.0879	9.57947e-05	16.1069	0.000108765	16.1269	7.85217e-05	16.1269	8.91443e-05
16.0699	1.80084e-05	16.0699	0.000138519	16.0979	9.57947e-05	16.1169	0.000108734	16.1369	7.84912e-05	16.1369	8.96902e-05
16.0799	1.80389e-05	16.0799	0.00013855	16.1079	9.57947e-05	16.1269	0.000108795	16.1469	7.84607e-05	16.1469	8.91443e-05
16.0899	1.79962e-05	16.0899	0.00013855	16.1179	9.57947e-05	16.1369	0.000108734	16.1569	7.84607e-05	16.1569	8.96684e-05
16.0999	1.80084e-05	16.0999	0.00013855	16.1279	9.58252e-05	16.1469	0.000108765	16.1669	7.84607e-05	16.1669	8.91224e-05
16.1099	1.80206e-05	16.1099	0.00013855	16.1379	9.57947e-05	16.1569	0.000108704	16.1769	7.84607e-05	16.1769	8.96465e-05
16.1199	1.80084e-05	16.1199	0.000138519	16.1479	9.58252e-05	16.1669	0.000108765	16.1869	7.84607e-05	16.1869	8.90897e-05
16.1299	1.80023e-05	16.1299	0.00013855	16.1579	9.58557e-05	16.1769	0.000108643	16.1969	7.84607e-05	16.1969	8.96138e-05
16.1399	1.80023e-05	16.1399	0.00013855	16.1679	9.58557e-05	16.1869	0.000108704	16.2069	7.84607e-05	16.2069	8.90787e-05
16.1499	1.79779e-05	16.1499	0.00013858	16.1779	9.58252e-05	16.1969	0.000108643	16.2169	7.84607e-05	16.2169	8.96029e-05
16.1599	1.80206e-05	16.1599	0.00013855	16.1879	9.58252e-05	16.2069	0.000108673	16.2269	7.84302e-05	16.2269	8.90569e-05
16.1699	1.79932e-05	16.1699	0.00013855	16.1979	9.57947e-05	16.2169	0.000108643	16.2369	7.84302e-05	16.2369	8.9581e-05
16.1799	1.80054e-05	16.1799	0.000138519	16.2079	9.58252e-05	16.2269	0.000108704	16.2469	7.84302e-05	16.2469	8.9046e-05
16.1899	1.79871e-05	16.1899	0.00013858	16.2179	9.58252e-05	16.2369	0.000108612	16.2569	7.83997e-05	16.2569	8.95701e-05
16.1999	1.79993e-05	16.1999	0.000138489	16.2279	9.58252e-05	16.2469	0.000108673	16.2669	7.83997e-05	16.2669	8.9046e-05
16.2099	1.79626e-05	16.2099	0.00013855	16.2379	9.58557e-05	16.2569	0.000108673	16.2769	7.83997e-05	16.2769	8.95701e-05
16.2199	1.80023e-05	16.2199	0.000138519	16.2479	9.58252e-05	16.2669	0.000108734	16.2869	7.83997e-05	16.2869	8.90351e-05
16.2299	1.79657e-05	16.2299	0.000138519	16.2579	9.58252e-05	16.2769	0.000108704	16.2969	7.84302e-05	16.2969	8.95374e-05
16.2399	1.80023e-05	16.2399	0.000138489	16.2679	9.58252e-05	16.2869	0.000108765	16.3069	7.83997e-05	16.3069	8.90023e-05
16.2499	1.79565e-05	16.2499	0.000138519	16.2779	9.58557e-05	16.2969	0.000108734	16.3169	7.84302e-05	16.3169	8.95046e-05
16.2599	1.79688e-05	16.2599	0.000138458	16.2879	9.58252e-05	16.3069	0.000108765	16.3269	7.83997e-05	16.3269	8.89696e-05
16.2699	1.79596e-05	16.2699	0.000138489	16.2979	9.58252e-05	16.3169	0.000108734	16.3369	7.84302e-05	16.3369	8.94609e-05
16.2799	1.79749e-05	16.2799	0.000138458	16.3079	9.58252e-05	16.3269	0.000108765	16.3469	7.84302e-05	16.3469	8.89477e-05
16.2899	1.79474e-05	16.2899	0.000138428	16.3179	9.58252e-05	16.3369	0.000108704	16.3569	7.84302e-05	16.3569	8.945e-05
16.2999	1.79565e-05	16.2999	0.000138428	16.3279	9.58252e-05	16.3469	0.000108765	16.3669	7.84302e-05	16.3669	8.89259e-05
16.3099	1.79657e-05	16.3099	0.000138489	16.3379	9.58252e-05	16.3569	0.000108734	16.3769	7.84302e-05	16.3769	8.94282e-05
16.3199	1.79657e-05	16.3199	0.000138458	16.3479	9.58252e-05	16.3669	0.000108734	16.3869	7.83997e-05	16.3869	8.89259e-05
16.3299	1.79626e-05	16.3299	0.000138458	16.3579	9.58252e-05	16.3769	0.000108673	16.3969	7.83997e-05	16.3969	8.94172e-05
16.3399	1.79535e-05	16.3399	0.000138397	16.3679	9.58557e-05	16.3869	0.000108795	16.4069	7.83997e-05	16.4069	8.8904e-05
16.3499	1.79199e-05	16.3499	0.000138458	16.3779	9.58557e-05	16.3969	0.000108704	16.4169	7.83997e-05	16.4169	8.93954e-05
16.3599	1.79443e-05	16.3599	0.000138458	16.3879	9.58862e-05	16.4069	0.000108795	16.4269	7.84302e-05	16.4269	8.88931e-05
16.3699	1.7926e-05	16.3699	0.000138428	16.3979	9.58557e-05	16.4169	0.000108765	16.4369	7.83997e-05	16.4369	8.93845e-05
16.3799	1.79504e-05	16.3799	0.000138397	16.4079	9.58557e-05	16.4269	0.000108826	16.4469	7.83691e-05	16.4469	8.88822e-05
16.3899	1.79474e-05	16.3899	0.000138458	16.4179	9.58557e-05	16.4369	0.000108795	16.4569	7.83691e-05	16.4569	8.93517e-05
16.3999	1.79443e-05	16.3999	0.000138428	16.4279	9.58557e-05	16.4469	0.000108826	16.4669	7.83081e-05	16.4669	8.88713e-05
16.4099	1.79047e-05	16.4099	0.000138428	16.4379	9.58862e-05	16.4569	0.000108826	16.4769	7.83386e-05	16.4769	8.93408e-05
16.4199	1.79504e-05	16.4199	0.000138428	16.4479	9.58862e-05	16.4669	0.000108887	16.4869	7.83081e-05	16.4869	8.88494e-05
16.4299	1.78894e-05	16.4299	0.000138428	16.4579	9.58862e-05	16.4769	0.000108795	16.4969	7.83081e-05	16.4969	8.9319e-05
16.4399	1.79077e-05	16.4399	0.000138397	16.4679	9.58862e-05	16.4869	0.000108826	16.5069	7.82776e-05	16.5069	8.88494e-05
16.4499	1.78833e-05	16.4499	0.000138428	16.4779	9.59167e-05	16.4969	0.000108765	16.5169	7.83081e-05	16.5169	8.92862e-05
16.4599	1.79169e-05	16.4599	0.000138367	16.4879	9.59167e-05	16.5069	0.000108795	16.5269	7.82776e-05	16.5269	8.88167e-05
16.4699	1.79047e-05	16.4699	0.000138428	16.4979	9.58862e-05	16.5169	0.000108734	16.5369	7.82776e-05	16.5369	8.92644e-05
16.4799	1.79108e-05	16.4799	0.000138367	16.5079	9.59167e-05	16.5269	0.000108765	16.5469	7.82471e-05	16.5469	8.87948e-05
16.4899	1.78955e-05	16.4899	0.000138428	16.5179	9.58557e-05	16.5369	0.000108734	16.5569	7.82776e-05	16.5569	8.92316e-05
16.4999	1.78986e-05	16.4999	0.000138397	16.5279	9.58862e-05	16.5469	0.000108765	16.5669	7.82471e-05	16.5669	8.87621e-05
16.5099	1.78772e-05	16.5099	0.000138397	16.5379	9.58557e-05	16.5569	0.000108704	16.5769	7.82776e-05	16.5769	8.91989e-05
16.5199	1.79047e-05	16.5199	0.000138397	16.5479	9.59167e-05	16.5669	0.000108765	16.5869	7.82471e-05	16.5869	8.87403e-05
16.5299	1.78894e-05	16.5299	0.000138428	16.5579	9.59167e-05	16.5769	0.000108765	16.5969	7.82471e-05	16.5969	8.91661e-05
16.5399	1.79047e-05	16.5399	0.000138367	16.5679	9.59167e-05	16.5869	0.000108795	16.6069	7.82471e-05	16.6069	8.87184e-05
16.5499	1.78772e-05	16.5499	0.000138397	16.5779	9.58862e-05	16.5969	0.000108795	16.6169	7.82471e-05	16.6169	8.91443e-05
16.5599	1.79016e-05	16.5599	0.000138367	16.5879	9.59167e-05	16.6069	0.000108856	16.6269	7.82166e-05	16.6269	8.86966e-05
16.5699	1.78711e-05	16.5699	0.000138428	16.5979	9.59167e-05	16.6169	0.000108795	16.6369	7.82776e-05	16.6369	8.91115e-05
16.5799	1.79016e-05	16.5799	0.000138397	16.6079	9.59167e-05	16.6269	0.000108856	16.6469	7.82471e-05	16.6469	8.86638e-05
16.5899	1.78833e-05	16.5899	0.000138428	16.6179	9.59167e-05	16.6369	0.000108795	16.6569	7.82471e-05	16.6569	8.90678e-05
16.5999	1.78894e-05	16.5999	0.000138367	16.6279	9.59167e-05	16.6469	0.000108826	16.6669	7.82776e-05	16.6669	8.8642e-05
16.6099	1.7865e-05	16.6099	0.000138397	16.6379	9.59167e-05	16.6569	0.000108795	16.6769	7.82471e-05	16.6769	8.9046e-05
16.6199	1.79138e-05	16.6199	0.000138367	16.6479	9.59167e-05	16.6669	0.000108856	16.6869	7.82776e-05	16.6869	8.86311e-05
16.6299	1.78589e-05	16.6299	0.000138428	16.6579	9.59167e-05	16.6769	0.000108795	16.6969	7.82776e-05	16.6969	8.9046e-05
16.6399	1.79047e-05	16.6399	0.000138336	16.6679	9.59167e-05	16.6869	0.000108795	16.7069	7.82776e-05	16.7069	8.86311e-05
16.6499	1.7868e-05	16.6499	0.000138367	16.6779	9.59167e-05	16.6969	0.000108765	16.7169	7.82776e-05	16.7169	8.90351e-05
16.6599	1.78772e-05	16.6599	0.000138367	16.6879	9.59473e-05	16.7069	0.000108826	16.7269	7.82776e-05	16.7269	8.86201e-05
16.6699	1.78558e-05	16.6699	0.000138397	16.6979	9.59473e-05	16.7169	0.000108795	16.7369	7.83081e-05	16.7369	8.90023e-05
16.6799	1.7868e-05	16.6799	0.000138336	16.7079	9.59473e-05	16.7269	0.000108826	16.7469	7.82776e-05	16.7469	8.85874e-05
16.6899	1.78497e-05	16.6899	0.000138428	16.7179	9.59473e-05	16.7369	0.000108826	16.7569	7.83081e-05	16.7569	8.89805e-05
16.6999	1.78925e-05	16.6999	0.000138306	16.7279	9.59167e-05	16.7469	0.000108856	16.7669	7.82776e-05	16.7669	8.85765e-05
16.7099	1.78253e-05	16.7099	0.000138367	16.7379	9.59167e-05	16.7569	0.000108856	16.7769	7.83081e-05	16.7769	8.89586e-05
16.7199	1.78833e-05	16.7199	0.000138336	16.7479	9.58862e-05	16.7669	0.000108917	16.7869	7.82471e-05	16.7869	8.85546e-05
16.7299	1.78345e-05	16.7299	0.000138428	16.7579	9.59167e-05	16.7769	0.000108887	16.7969	7.82471e-05	16.7969	8.89477e-05
16.7399	1.78772e-05	16.7399	0.000138336	16.7679	9.59473e-05	16.7869	0.000108917	16.8069	7.8186e-05	16.8069	8.85546e-05
16.7499	1.78223e-05	16.7499	0.000138367	16.7779	9.59167e-05	16.7969	0.000108917	16.8169	7.8186e-05	16.8169	8.89259e-05
16.7599	1.78528e-05	16.7599	0.000138275	16.7879	9.59473e-05	16.8069	0.000108948	16.8269	7.81555e-05	16.8269	8.85437e-05
16.7699	1.7807e-05	16.7699	0.000138367	16.7979	9.59473e-05	16.8169	0.000108917	16.8369	7.81555e-05	16.8369	8.89259e-05
16.7799	1.78589e-05	16.7799	0.000138306	16.8079	9.59167e-05	16.8269	0.000108917	16.8469	7.80945e-05	16.8469	8.85219e-05
16.7899	1.78406e-05	16.7899	0.000138336	16.8179	9.59473e-05	16.8369	0.000108887	16.8569	7.8125e-05	16.8569	8.88822e-05
16.7999	1.78467e-05	16.7999	0.000138275	16.8279	9.59473e-05	16.8469	0.000108948	16.8669	7.80945e-05	16.8669	8.85109e-05
16.8099	1.78528e-05	16.8099	0.000138367	16.8379	9.59778e-05	16.8569	0.000108887	16.8769	7.8125e-05	16.8769	8.88604e-05
16.8199	1.78345e-05	16.8199	0.000138306	16.8479	9.59473e-05	16.8669	0.000108917	16.8869	7.80945e-05	16.8869	8.84891e-05
16.8299	1.78101e-05	16.8299	0.000138336	16.8579	9.59167e-05	16.8769	0.000108887	16.8969	7.8125e-05	16.8969	8.88494e-05
16.8399	1.78345e-05	16.8399	0.000138306	16.8679	9.59473e-05	16.8869	0.000108917	16.9069	7.8125e-05	16.9069	8.84891e-05
16.8499	1.78101e-05	16.8499	0.000138336	16.8779	9.59473e-05	16.8969	0.000108887	16.9169	7.8125e-05	16.9169	8.88385e-05
16.8599	1.78406e-05	16.8599	0.000138306	16.8879	9.59473e-05	16.9069	0.000109009	16.9269	7.8125e-05	16.9269	8.84782e-05
16.8699	1.77948e-05	16.8699	0.000138336	16.8979	9.59473e-05	16.9169	0.000108948	16.9369	7.8125e-05	16.9369	8.88167e-05
16.8799	1.78406e-05	16.8799	0.000138306	16.9079	9.59473e-05	16.9269	0.000109009	16.9469	7.80945e-05	16.9469	8.84673e-05
16.8899	1.78223e-05	16.8899	0.000138336	16.9179	9.59778e-05	16.9369	0.000108978	16.9569	7.8125e-05	16.9569	8.87948e-05
16.8999	1.78375e-05	16.8999	0.000138245	16.9279	9.59473e-05	16.9469	0.000109039	16.9669	7.80945e-05	16.9669	8.84454e-05
16.9099	1.78101e-05	16.9099	0.000138306	16.9379	9.59778e-05	16.9569	0.000109009	16.9769	7.8125e-05	16.9769	8.87621e-05
16.9199	1.78406e-05	16.9199	0.000138245	16.9479	9.59473e-05	16.9669	0.000109039	16.9869	7.80945e-05	16.9869	8.84236e-05
16.9299	1.7807e-05	16.9299	0.000138306	16.9579	9.59778e-05	16.9769	0.000109009	16.9969	7.8125e-05	16.9969	8.87959e-05
16.9399	1.78101e-05	16.9399	0.000138275	16.9679	9.59473e-05	16.9869	0.000109009	17.0069	7.80945e-05	17.0069	8.85164e-05
16.9499	1.77734e-05	16.9499	0.000138306	16.9779	9.59778e-05	16.9969	0.000108978	17.0169	7.80945e-05	17.0169	8.88615e-05
16.9599	1.78406e-05	16.9599	0.000138245	16.9879	9.59473e-05	17.0069	0.000109009	17.0269	7.8064e-05	17.0269	8.86059e-05
16.9699	1.77734e-05	16.9699	0.000138306	16.9979	9.59778e-05	17.0169	0.000108948	17.0369	7.8064e-05	17.0369	8.89466e-05
16.9799	1.7804e-05	16.9799	0.000138245	17.0079	9.59473e-05	17.0269	0.000108978	17.0469	7.80334e-05	17.0469	8.86332e-05
16.9899	1.77795e-05	16.9899	0.000138306	17.0179	9.60083e-05	17.0369	0.000108978	17.0569	7.8064e-05	17.0569	8.89171e-05
16.9999	1.7807e-05	16.9999	0.000138245	17.0279	9.59778e-05	17.0469	0.000109039	17.0669	7.80029e-05	17.0669	8.86311e-05
17.0099	1.77704e-05	17.0099	0.000138306	17.0379	9.60083e-05	17.0569	0.000108978	17.0769	7.80334e-05	17.0769	8.89106e-05
17.0199	1.7807e-05	17.0199	0.000138214	17.0479	9.59473e-05	17.0669	0.00010907	17.0869	7.80029e-05	17.0869	8.8619e-05
17.0299	1.77795e-05	17.0299	0.000138275	17.0579	9.60083e-05	17.0769	0.000109039	17.0969	7.8064e-05	17.0969	8.88877e-05
17.0399	1.7804e-05	17.0399	0.000138214	17.0679	9.59473e-05	17.0869	0.0001091	17.1069	7.80334e-05	17.1069	8.86103e-05
17.0499	1.77856e-05	17.0499	0.000138306	17.0779	9.59473e-05	17.0969	0.0001091	17.1169	7.80334e-05	17.1169	8.88593e-05
17.0599	1.77979e-05	17.0599	0.000138214	17.0879	9.59473e-05	17.1069	0.000109131	17.1269	7.80029e-05	17.1269	8.85863e-05
17.0699	1.77734e-05	17.0699	0.000138306	17.0979	9.59778e-05	17.1169	0.0001091	17.1369	7.80334e-05	17.1369	8.88484e-05
17.0799	1.77917e-05	17.0799	0.000138245	17.1079	9.59473e-05	17.1269	0.000109161	17.1469	7.80029e-05	17.1469	8.85885e-05
17.0899	1.77551e-05	17.0899	0.000138306	17.1179	9.59778e-05	17.1369	0.00010907	17.1569	7.80334e-05	17.1569	8.88309e-05
17.0999	1.77765e-05	17.0999	0.000138245	17.1279	9.59167e-05	17.1469	0.0001091	17.1669	7.80029e-05	17.1669	8.85786e-05
17.1099	1.77765e-05	17.1099	0.000138306	17.1379	9.59778e-05	17.1569	0.00010907	17.1769	7.80334e-05	17.1769	8.88101e-05
17.1199	1.77856e-05	17.1199	0.000138245	17.1479	9.59778e-05	17.1669	0.00010907	17.1869	7.80029e-05	17.1869	8.85623e-05
17.1299	1.7749e-05	17.1299	0.000138306	17.1579	9.60083e-05	17.1769	0.0001091	17.1969	7.80029e-05	17.1969	8.87752e-05
17.1399	1.77826e-05	17.1399	0.000138245	17.1679	9.59778e-05	17.1869	0.0001091	17.2069	7.80029e-05	17.2069	8.85426e-05
17.1499	1.7746e-05	17.1499	0.000138306	17.1779	9.60083e-05	17.1969	0.0001091	17.2169	7.80029e-05	17.2169	8.87446e-05
17.1599	1.7749e-05	17.1599	0.000138214	17.1879	9.59473e-05	17.2069	0.000109161	17.2269	7.79724e-05	17.2269	8.85393e-05
17.1699	1.7749e-05	17.1699	0.000138275	17.1979	9.59778e-05	17.2169	0.000109131	17.2369	7.80029e-05	17.2369	8.87261e-05
17.1799	1.77826e-05	17.1799	0.000138245	17.2079	9.59473e-05	17.2269	0.000109192	17.2469	7.79114e-05	17.2469	8.85219e-05
17.1899	1.7749e-05	17.1899	0.000138275	17.2179	9.59778e-05	17.2369	0.000109192	17.2569	7.79419e-05	17.2569	8.87031e-05
17.1999	1.77551e-05	17.1999	0.000138214	17.2279	9.59473e-05	17.2469	0.000109222	17.2669	7.79114e-05	17.2669	8.85164e-05
17.2099	1.77338e-05	17.2099	0.000138275	17.2379	9.60083e-05	17.2569	0.000109192	17.2769	7.80029e-05	17.2769	8.86715e-05
17.2199	1.77704e-05	17.2199	0.000138184	17.2479	9.59778e-05	17.2669	0.000109253	17.2869	7.79724e-05	17.2869	8.84935e-05
17.2299	1.77185e-05	17.2299	0.000138245	17.2579	9.59778e-05	17.2769	0.000109222	17.2969	7.79724e-05	17.2969	8.86442e-05
17.2399	1.77429e-05	17.2399	0.000138184	17.2679	9.59778e-05	17.2869	0.000109192	17.3069	7.79724e-05	17.3069	8.84858e-05
17.2499	1.77216e-05	17.2499	0.000138275	17.2779	9.60388e-05	17.2969	0.000109192	17.3169	7.79724e-05	17.3169	8.86267e-05
17.2599	1.7749e-05	17.2599	0.000138214	17.2879	9.59778e-05	17.3069	0.000109192	17.3269	7.79419e-05	17.3269	8.84673e-05
17.2699	1.77246e-05	17.2699	0.000138245	17.2979	9.60083e-05	17.3169	0.000109161	17.3369	7.79724e-05	17.3369	8.85994e-05
17.2799	1.77673e-05	17.2799	0.000138214	17.3079	9.59473e-05	17.3269	0.000109131	17.3469	7.79419e-05	17.3469	8.84618e-05
17.2899	1.77124e-05	17.2899	0.000138214	17.3179	9.60083e-05	17.3369	0.000109131	17.3569	7.80029e-05	17.3569	8.85721e-05
17.2999	1.77307e-05	17.2999	0.000138214	17.3279	9.59778e-05	17.3469	0.000109192	17.3669	7.79724e-05	17.3669	8.84542e-05
17.3099	1.77216e-05	17.3099	0.000138245	17.3379	9.60388e-05	17.3569	0.000109161	17.3769	7.80029e-05	17.3769	8.85645e-05
17.3199	1.7746e-05	17.3199	0.000138214	17.3479	9.59778e-05	17.3669	0.000109192	17.3869	7.79419e-05	17.3869	8.84487e-05
17.3299	1.77307e-05	17.3299	0.000138245	17.3579	9.60388e-05	17.3769	0.000109161	17.3969	7.79419e-05	17.3969	8.85415e-05
17.3399	1.77399e-05	17.3399	0.000138184	17.3679	9.60083e-05	17.3869	0.000109222	17.4069	7.78809e-05	17.4069	8.84345e-05
17.3499	1.76941e-05	17.3499	0.000138214	17.3779	9.60388e-05	17.3969	0.000109222	17.4169	7.79114e-05	17.4169	8.85197e-05
17.3599	1.7746e-05	17.3599	0.000138214	17.3879	9.60083e-05	17.4069	0.000109222	17.4269	7.78503e-05	17.4269	8.84225e-05
17.3699	1.76941e-05	17.3699	0.000138214	17.3979	9.60388e-05	17.4169	0.000109222	17.4369	7.78809e-05	17.4369	8.84946e-05
17.3799	1.77338e-05	17.3799	0.000138184	17.4079	9.59778e-05	17.4269	0.000109314	17.4469	7.78503e-05	17.4469	8.8417e-05
17.3899	1.7691e-05	17.3899	0.000138245	17.4179	9.60388e-05	17.4369	0.000109222	17.4569	7.78503e-05	17.4569	8.84869e-05
17.3999	1.77307e-05	17.3999	0.000138214	17.4279	9.59778e-05	17.4469	0.000109253	17.4669	7.78503e-05	17.4669	8.83996e-05
17.4099	1.7691e-05	17.4099	0.000138245	17.4379	9.60388e-05	17.4569	0.000109222	17.4769	7.78809e-05	17.4769	8.84574e-05
17.4199	1.77368e-05	17.4199	0.000138184	17.4479	9.60083e-05	17.4669	0.000109222	17.4869	7.78198e-05	17.4869	8.83941e-05
17.4299	1.7691e-05	17.4299	0.000138214	17.4579	9.60388e-05	17.4769	0.000109222	17.4969	7.78503e-05	17.4969	8.84367e-05
17.4399	1.77307e-05	17.4399	0.000138184	17.4679	9.60388e-05	17.4869	0.000109222	17.5069	7.78503e-05	17.5069	8.83635e-05
17.4499	1.76819e-05	17.4499	0.000138245	17.4779	9.60388e-05	17.4969	0.000109192	17.5169	7.78503e-05	17.5169	8.84127e-05
17.4599	1.7691e-05	17.4599	0.000138184	17.4879	9.60388e-05	17.5069	0.000109192	17.5269	7.78198e-05	17.5269	8.83603e-05
17.4699	1.76788e-05	17.4699	0.000138245	17.4979	9.60693e-05	17.5169	0.000109192	17.5369	7.78503e-05	17.5369	8.83996e-05
17.4799	1.7688e-05	17.4799	0.000138123	17.5079	9.60388e-05	17.5269	0.000109222	17.5469	7.78503e-05	17.5469	8.83493e-05
17.4899	1.76819e-05	17.4899	0.000138214	17.5179	9.60693e-05	17.5369	0.000109253	17.5569	7.78809e-05	17.5569	8.83897e-05
17.4999	1.77032e-05	17.4999	0.000138123	17.5279	9.60083e-05	17.5469	0.000109253	17.5669	7.78503e-05	17.5669	8.83461e-05
17.5099	1.76575e-05	17.5099	0.000138184	17.5379	9.60388e-05	17.5569	0.000109253	17.5769	7.78809e-05	17.5769	8.83679e-05
17.5199	1.76971e-05	17.5199	0.000138153	17.5479	9.60083e-05	17.5669	0.000109283	17.5869	7.78198e-05	17.5869	8.83199e-05
17.5299	1.76727e-05	17.5299	0.000138214	17.5579	9.60693e-05	17.5769	0.000109283	17.5969	7.78198e-05	17.5969	8.83428e-05
17.5399	1.76788e-05	17.5399	0.000138184	17.5679	9.60388e-05	17.5869	0.000109314	17.6069	7.78198e-05	17.6069	8.83079e-05
17.5499	1.76514e-05	17.5499	0.000138184	17.5779	9.60999e-05	17.5969	0.000109314	17.6169	7.78198e-05	17.6169	8.83177e-05
17.5599	1.76819e-05	17.5599	0.000138153	17.5879	9.60388e-05	17.6069	0.000109344	17.6269	7.77893e-05	17.6269	8.82958e-05
17.5699	1.76605e-05	17.5699	0.000138214	17.5979	9.60999e-05	17.6169	0.000109344	17.6369	7.77893e-05	17.6369	8.83111e-05
17.5799	1.76849e-05	17.5799	0.000138153	17.6079	9.60693e-05	17.6269	0.000109314	17.6469	7.77893e-05	17.6469	8.82937e-05
17.5899	1.76453e-05	17.5899	0.000138184	17.6179	9.61304e-05	17.6369	0.000109314	17.6569	7.78198e-05	17.6569	8.82947e-05
17.5999	1.76788e-05	17.5999	0.000138153	17.6279	9.60693e-05	17.6469	0.000109283	17.6669	7.77893e-05	17.6669	8.8286e-05
17.6099	1.76331e-05	17.6099	0.000138184	17.6379	9.60999e-05	17.6569	0.000109253	17.6769	7.78198e-05	17.6769	8.82675e-05
17.6199	1.76392e-05	17.6199	0.000138123	17.6479	9.60693e-05	17.6669	0.000109253	17.6869	7.77893e-05	17.6869	8.82707e-05
17.6299	1.76331e-05	17.6299	0.000138184	17.6579	9.60999e-05	17.6769	0.000109283	17.6969	7.77893e-05	17.6969	8.82445e-05
17.6399	1.76819e-05	17.6399	0.000138123	17.6679	9.60693e-05	17.6869	0.000109253	17.7069	7.77893e-05	17.7069	8.82478e-05
17.6499	1.76331e-05	17.6499	0.000138184	17.6779	9.60999e-05	17.6969	0.000109283	17.7169	7.77893e-05	17.7169	8.82249e-05
17.6599	1.76544e-05	17.6599	0.000138123	17.6879	9.60999e-05	17.7069	0.000109314	17.7269	7.77588e-05	17.7269	8.82412e-05
17.6699	1.76147e-05	17.6699	0.000138184	17.6979	9.61304e-05	17.7169	0.000109375	17.7369	7.78198e-05	17.7369	8.82074e-05
17.6799	1.76605e-05	17.6799	0.000138153	17.7079	9.60999e-05	17.7269	0.000109375	17.7469	7.77893e-05	17.7469	8.82271e-05
17.6899	1.76147e-05	17.6899	0.000138184	17.7179	9.61304e-05	17.7369	0.000109375	17.7569	7.78503e-05	17.7569	8.81899e-05
17.6999	1.76453e-05	17.6999	0.000138153	17.7279	9.60693e-05	17.7469	0.000109436	17.7669	7.78198e-05	17.7669	8.82129e-05
17.7099	1.76208e-05	17.7099	0.000138184	17.7379	9.61304e-05	17.7569	0.000109406	17.7769	7.78198e-05	17.7769	8.81692e-05
17.7199	1.76208e-05	17.7199	0.000138123	17.7479	9.60999e-05	17.7669	0.000109375	17.7869	7.77588e-05	17.7869	8.81943e-05
17.7299	1.76086e-05	17.7299	0.000138184	17.7579	9.61304e-05	17.7769	0.000109375	17.7969	7.77588e-05	17.7969	8.81517e-05
17.7399	1.76361e-05	17.7399	0.000138153	17.7679	9.60693e-05	17.7869	0.000109375	17.8069	7.77283e-05	17.8069	8.81954e-05
17.7499	1.76208e-05	17.7499	0.000138184	17.7779	9.61304e-05	17.7969	0.000109375	17.8169	7.77283e-05	17.8169	8.81364e-05
17.7599	1.76208e-05	17.7599	0.000138153	17.7879	9.60693e-05	17.8069	0.000109344	17.8269	7.76978e-05	17.8269	8.81812e-05
17.7699	1.75873e-05	17.7699	0.000138184	17.7979	9.61304e-05	17.8169	0.000109344	17.8369	7.76978e-05	17.8369	8.81168e-05
17.7799	1.76361e-05	17.7799	0.000138153	17.8079	9.60693e-05	17.8269	0.000109344	17.8469	7.76978e-05	17.8469	8.8167e-05
17.7899	1.76025e-05	17.7899	0.000138214	17.8179	9.61304e-05	17.8369	0.000109344	17.8569	7.76978e-05	17.8569	8.80927e-05
17.7999	1.76147e-05	17.7999	0.000138153	17.8279	9.60999e-05	17.8469	0.000109375	17.8669	7.76978e-05	17.8669	8.81528e-05
17.8099	1.76147e-05	17.8099	0.000138245	17.8379	9.61304e-05	17.8569	0.000109406	17.8769	7.76978e-05	17.8769	8.80698e-05
17.8199	1.76208e-05	17.8199	0.000138153	17.8479	9.60999e-05	17.8669	0.000109406	17.8869	7.76978e-05	17.8869	8.81408e-05
17.8299	1.75842e-05	17.8299	0.000138184	17.8579	9.61304e-05	17.8769	0.000109436	17.8969	7.76978e-05	17.8969	8.80458e-05
17.8399	1.76025e-05	17.8399	0.000138123	17.8679	9.60999e-05	17.8869	0.000109467	17.9069	7.76978e-05	17.9069	8.81211e-05
17.8499	1.75995e-05	17.8499	0.000138245	17.8779	9.60999e-05	17.8969	0.000109436	17.9169	7.76672e-05	17.9169	8.8024e-05
17.8599	1.76025e-05	17.8599	0.000138123	17.8879	9.60999e-05	17.9069	0.000109436	17.9269	7.76672e-05	17.9269	8.812e-05
17.8699	1.75995e-05	17.8699	0.000138214	17.8979	9.61304e-05	17.9169	0.000109467	17.9369	7.76978e-05	17.9369	8.80109e-05
17.8799	1.75873e-05	17.8799	0.000138153	17.9079	9.60999e-05	17.9269	0.000109467	17.9469	7.76672e-05	17.9469	8.81168e-05
17.8899	1.7572e-05	17.8899	0.000138184	17.9179	9.60999e-05	17.9369	0.000109467	17.9569	7.76978e-05	17.9569	8.79934e-05
17.8999	1.76147e-05	17.8999	0.000138153	17.9279	9.60999e-05	17.9469	0.000109467	17.9669	7.76672e-05	17.9669	8.81004e-05
17.9099	1.7569e-05	17.9099	0.000138214	17.9379	9.61304e-05	17.9569	0.000109436	17.9769	7.76367e-05	17.9769	8.79748e-05
17.9199	1.75842e-05	17.9199	0.000138092	17.9479	9.61304e-05	17.9669	0.000109436	17.9869	7.76062e-05	17.9869	8.80927e-05
17.9299	1.75629e-05	17.9299	0.000138184	17.9579	9.61304e-05	17.9769	0.000109406	17.9969	7.76062e-05	17.9969	8.79552e-05
17.9399	1.75873e-05	17.9399	0.000138123	17.9679	9.60999e-05	17.9869	0.000109406	18.0069	7.76062e-05	18.0069	8.80906e-05
17.9499	1.75568e-05	17.9499	0.000138153	17.9779	9.61609e-05	17.9969	0.000109406	18.0169	7.76062e-05	18.0169	8.79497e-05
17.9599	1.75659e-05	17.9599	0.000138092	17.9879	9.60999e-05	18.0069	0.000109406	18.0269	7.76062e-05	18.0269	8.8084e-05
17.9699	1.75568e-05	17.9699	0.000138123	17.9979	9.61304e-05	18.0169	0.000109467	18.0369	7.76062e-05	18.0369	8.79311e-05
17.9799	1.75873e-05	17.9799	0.000138123	18.0079	9.60999e-05	18.0269	0.000109467	18.0469	7.76062e-05	18.0469	8.80709e-05
17.9899	1.75598e-05	17.9899	0.000138184	18.0179	9.61304e-05	18.0369	0.000109497	18.0569	7.76062e-05	18.0569	8.79082e-05
17.9999	1.7569e-05	17.9999	0.000138123	18.0279	9.60999e-05	18.0469	0.000109528	18.0669	7.75757e-05	18.0669	8.80578e-05
18.0099	1.75537e-05	18.0099	0.000138214	18.0379	9.61304e-05	18.0569	0.000109528	18.0769	7.75757e-05	18.0769	8.7882e-05
18.0199	1.75568e-05	18.0199	0.000138123	18.0479	9.60999e-05	18.0669	0.000109528	18.0869	7.76062e-05	18.0869	8.80403e-05
18.0299	1.75385e-05	18.0299	0.000138214	18.0579	9.61609e-05	18.0769	0.000109497	18.0969	7.76062e-05	18.0969	8.78547e-05
18.0399	1.75659e-05	18.0399	0.000138153	18.0679	9.61304e-05	18.0869	0.000109497	18.1069	7.76062e-05	18.1069	8.80163e-05
18.0499	1.75537e-05	18.0499	0.000138184	18.0779	9.61609e-05	18.0969	0.000109497	18.1169	7.76062e-05	18.1169	8.78209e-05
18.0599	1.75476e-05	18.0599	0.000138123	18.0879	9.61304e-05	18.1069	0.000109467	18.1269	7.76062e-05	18.1269	8.80021e-05
18.0699	1.75323e-05	18.0699	0.000138123	18.0979	9.61609e-05	18.1169	0.000109467	18.1369	7.76062e-05	18.1369	8.7799e-05
18.0799	1.75659e-05	18.0799	0.000138062	18.1079	9.61304e-05	18.1269	0.000109436	18.1469	7.76062e-05	18.1469	8.79945e-05
18.0899	1.75476e-05	18.0899	0.000138123	18.1179	9.61609e-05	18.1369	0.000109467	18.1569	7.75757e-05	18.1569	8.77859e-05
18.0999	1.75568e-05	18.0999	0.000138092	18.1279	9.60999e-05	18.1469	0.000109467	18.1669	7.75757e-05	18.1669	8.79945e-05
18.1099	1.75232e-05	18.1099	0.000138123	18.1379	9.61609e-05	18.1569	0.000109467	18.1769	7.75452e-05	18.1769	8.77805e-05
18.1199	1.75598e-05	18.1199	0.000138092	18.1479	9.60999e-05	18.1669	0.000109497	18.1869	7.75452e-05	18.1869	8.79945e-05
18.1299	1.75354e-05	18.1299	0.000138092	18.1579	9.61609e-05	18.1769	0.000109528	18.1969	7.75452e-05	18.1969	8.77597e-05
18.1399	1.75476e-05	18.1399	0.000138123	18.1679	9.60999e-05	18.1869	0.000109558	18.2069	7.75452e-05	18.2069	8.79857e-05
18.1499	1.75232e-05	18.1499	0.000138123	18.1779	9.61609e-05	18.1969	0.000109528	18.2169	7.75452e-05	18.2169	8.77477e-05
18.1599	1.75415e-05	18.1599	0.000138123	18.1879	9.61304e-05	18.2069	0.000109558	18.2269	7.75452e-05	18.2269	8.79726e-05
18.1699	1.75385e-05	18.1699	0.000138123	18.1979	9.61609e-05	18.2169	0.000109558	18.2369	7.75452e-05	18.2369	8.77084e-05
18.1799	1.75446e-05	18.1799	0.000138123	18.2079	9.61304e-05	18.2269	0.000109589	18.2469	7.75452e-05	18.2469	8.79595e-05
18.1899	1.7511e-05	18.1899	0.000138092	18.2179	9.61609e-05	18.2369	0.000109589	18.2569	7.75146e-05	18.2569	8.76909e-05
18.1999	1.75232e-05	18.1999	0.000138123	18.2279	9.61609e-05	18.2469	0.000109589	18.2669	7.75146e-05	18.2669	8.79388e-05
18.2099	1.75232e-05	18.2099	0.000138092	18.2379	9.61609e-05	18.2569	0.000109558	18.2769	7.75452e-05	18.2769	8.76614e-05
18.2199	1.75201e-05	18.2199	0.000138123	18.2479	9.61304e-05	18.2669	0.000109558	18.2869	7.75452e-05	18.2869	8.79497e-05
18.2299	1.75262e-05	18.2299	0.000138092	18.2579	9.61609e-05	18.2769	0.000109528	18.2969	7.75146e-05	18.2969	8.76538e-05
18.2399	1.75415e-05	18.2399	0.000138123	18.2679	9.61304e-05	18.2869	0.000109528	18.3069	7.75146e-05	18.3069	8.79355e-05
18.2499	1.75079e-05	18.2499	0.000138062	18.2779	9.61609e-05	18.2969	0.000109528	18.3169	7.75146e-05	18.3169	8.76309e-05
18.2599	1.75262e-05	18.2599	0.000138123	18.2879	9.61609e-05	18.3069	0.000109528	18.3269	7.75452e-05	18.3269	8.793e-05
18.2699	1.75049e-05	18.2699	0.000138062	18.2979	9.61914e-05	18.3169	0.000109528	18.3369	7.75452e-05	18.3369	8.76003e-05
18.2799	1.75354e-05	18.2799	0.000138123	18.3079	9.61609e-05	18.3269	0.000109558	18.3469	7.75452e-05	18.3469	8.79104e-05
18.2899	1.75171e-05	18.2899	0.000138123	18.3179	9.61914e-05	18.3369	0.000109589	18.3569	7.75146e-05	18.3569	8.75839e-05
18.2999	1.75201e-05	18.2999	0.000138092	18.3279	9.61609e-05	18.3469	0.000109589	18.3669	7.75146e-05	18.3669	8.79006e-05
18.3099	1.74866e-05	18.3099	0.000138123	18.3379	9.61914e-05	18.3569	0.000109619	18.3769	7.75146e-05	18.3769	8.7561e-05
18.3199	1.75385e-05	18.3199	0.000138092	18.3479	9.61609e-05	18.3669	0.000109619	18.3869	7.74841e-05	18.3869	8.78962e-05
18.3299	1.75049e-05	18.3299	0.000138092	18.3579	9.61914e-05	18.3769	0.00010968	18.3969	7.75146e-05	18.3969	8.75413e-05
18.3399	1.75171e-05	18.3399	0.000138092	18.3679	9.61914e-05	18.3869	0.000109619	18.4069	7.74841e-05	18.4069	8.78842e-05
18.3499	1.74957e-05	18.3499	0.000138123	18.3779	9.61914e-05	18.3969	0.000109619	18.4169	7.75146e-05	18.4169	8.75271e-05
18.3599	1.75049e-05	18.3599	0.000138092	18.3879	9.61914e-05	18.4069	0.000109619	18.4269	7.74841e-05	18.4269	8.787e-05
18.3699	1.74896e-05	18.3699	0.000138092	18.3979	9.61914e-05	18.4169	0.00010965	18.4369	7.75146e-05	18.4369	8.75009e-05
18.3799	1.75293e-05	18.3799	0.000138123	18.4079	9.61914e-05	18.4269	0.000109619	18.4469	7.74841e-05	18.4469	8.78558e-05
18.3899	1.74866e-05	18.3899	0.000138092	18.4179	9.62219e-05	18.4369	0.000109619	18.4569	7.74841e-05	18.4569	8.74769e-05
18.3999	1.74835e-05	18.3999	0.000138062	18.4279	9.61914e-05	18.4469	0.000109589	18.4669	7.74841e-05	18.4669	8.78361e-05
18.4099	1.74744e-05	18.4099	0.000138092	18.4379	9.61914e-05	18.4569	0.000109619	18.4769	7.74841e-05	18.4769	8.74431e-05
18.4199	1.7514e-05	18.4199	0.000138062	18.4479	9.62219e-05	18.4669	0.000109619	18.4869	7.74841e-05	18.4869	8.78056e-05
18.4299	1.74957e-05	18.4299	0.000138123	18.4579	9.61914e-05	18.4769	0.000109619	18.4969	7.75146e-05	18.4969	8.74234e-05
18.4399	1.74835e-05	18.4399	0.000138062	18.4679	9.61914e-05	18.4869	0.00010965	18.5069	7.74841e-05	18.5069	8.78012e-05
18.4499	1.75049e-05	18.4499	0.000138123	18.4779	9.62219e-05	18.4969	0.00010968	18.5169	7.75146e-05	18.5169	8.74179e-05
18.4599	1.74774e-05	18.4599	0.000138062	18.4879	9.61914e-05	18.5069	0.00010968	18.5269	7.74536e-05	18.5269	8.78132e-05
18.4699	1.75079e-05	18.4699	0.000138123	18.4979	9.61914e-05	18.5169	0.00010968	18.5369	7.74536e-05	18.5369	8.74212e-05
18.4799	1.74652e-05	18.4799	0.000138092	18.5079	9.62219e-05	18.5269	0.000109711	18.5469	7.74231e-05	18.5469	8.78143e-05
18.4899	1.74713e-05	18.4899	0.000138123	18.5179	9.62219e-05	18.5369	0.000109741	18.5569	7.74231e-05	18.5569	8.74048e-05
18.4999	1.74683e-05	18.4999	0.000138062	18.5279	9.62219e-05	18.5469	0.00010968	18.5669	7.73621e-05	18.5669	8.77979e-05
18.5099	1.74622e-05	18.5099	0.000138092	18.5379	9.61914e-05	18.5569	0.000109741	18.5769	7.73621e-05	18.5769	8.73863e-05
18.5199	1.74713e-05	18.5199	0.000138062	18.5479	9.62219e-05	18.5669	0.000109711	18.5869	7.73621e-05	18.5869	8.77892e-05
18.5299	1.74744e-05	18.5299	0.000138092	18.5579	9.62219e-05	18.5769	0.000109711	18.5969	7.73621e-05	18.5969	8.73688e-05
18.5399	1.74744e-05	18.5399	0.000138062	18.5679	9.61914e-05	18.5869	0.00010968	18.6069	7.73621e-05	18.6069	8.77848e-05
18.5499	1.7453e-05	18.5499	0.000138062	18.5779	9.62219e-05	18.5969	0.000109711	18.6169	7.7301e-05	18.6169	8.73601e-05
18.5599	1.74683e-05	18.5599	0.000138062	18.5879	9.62219e-05	18.6069	0.00010965	18.6269	7.73315e-05	18.6269	8.77761e-05
18.5699	1.74683e-05	18.5699	0.000138092	18.5979	9.62219e-05	18.6169	0.00010965	18.6369	7.7301e-05	18.6369	8.73491e-05
18.5799	1.74652e-05	18.5799	0.000138092	18.6079	9.62219e-05	18.6269	0.000109619	18.6469	7.7301e-05	18.6469	8.77521e-05
18.5899	1.7453e-05	18.5899	0.000138092	18.6179	9.62219e-05	18.6369	0.00010968	18.6569	7.7301e-05	18.6569	8.73109e-05
18.5999	1.74774e-05	18.5999	0.000138092	18.6279	9.61914e-05	18.6469	0.00010968	18.6669	7.7301e-05	18.6669	8.77335e-05
18.6099	1.74469e-05	18.6099	0.000138092	18.6379	9.62219e-05	18.6569	0.000109741	18.6769	7.7301e-05	18.6769	8.72913e-05
18.6199	1.74805e-05	18.6199	0.000138062	18.6479	9.62219e-05	18.6669	0.000109741	18.6869	7.73315e-05	18.6869	8.77073e-05
18.6299	1.74408e-05	18.6299	0.000138062	18.6579	9.62219e-05	18.6769	0.000109772	18.6969	7.73315e-05	18.6969	8.72793e-05
18.6399	1.74438e-05	18.6399	0.000138062	18.6679	9.62219e-05	18.6869	0.000109741	18.7069	7.73621e-05	18.7069	8.77128e-05
18.6499	1.74469e-05	18.6499	0.000138062	18.6779	9.62219e-05	18.6969	0.000109802	18.7169	7.73315e-05	18.7169	8.72662e-05
18.6599	1.745e-05	18.6599	0.000138062	18.6879	9.62219e-05	18.7069	0.000109772	18.7269	7.73315e-05	18.7269	8.76887e-05
18.6699	1.74072e-05	18.6699	0.000138062	18.6979	9.62219e-05	18.7169	0.000109833	18.7369	7.7301e-05	18.7369	8.72465e-05
18.6799	1.74683e-05	18.6799	0.000138123	18.7079	9.62219e-05	18.7269	0.000109833	18.7469	7.73315e-05	18.7469	8.76745e-05
18.6899	1.74255e-05	18.6899	0.000138062	18.7179	9.62219e-05	18.7369	0.000109894	18.7569	7.73315e-05	18.7569	8.72214e-05
18.6999	1.74469e-05	18.6999	0.000138031	18.7279	9.62219e-05	18.7469	0.000109802	18.7669	7.73315e-05	18.7669	8.76636e-05
18.7099	1.74164e-05	18.7099	0.000138062	18.7379	9.62524e-05	18.7569	0.000109863	18.7769	7.7301e-05	18.7769	8.72225e-05
18.7199	1.74347e-05	18.7199	0.000138062	18.7479	9.62219e-05	18.7669	0.000109772	18.7869	7.73315e-05	18.7869	8.76625e-05
18.7299	1.74286e-05	18.7299	0.000138062	18.7579	9.62219e-05	18.7769	0.000109802	18.7969	7.7301e-05	18.7969	8.72094e-05
18.7399	1.74438e-05	18.7399	0.000138092	18.7679	9.62219e-05	18.7869	0.000109741	18.8069	7.73621e-05	18.8069	8.76614e-05
18.7499	1.74194e-05	18.7499	0.000138062	18.7779	9.62219e-05	18.7969	0.000109833	18.8169	7.73621e-05	18.8169	8.72061e-05
18.7599	1.74408e-05	18.7599	0.000138092	18.7879	9.62524e-05	18.8069	0.000109741	18.8269	7.73621e-05	18.8269	8.76429e-05
18.7699	1.74194e-05	18.7699	0.000138092	18.7979	9.62219e-05	18.8169	0.000109833	18.8369	7.73315e-05	18.8369	8.71875e-05
18.7799	1.74561e-05	18.7799	0.000138092	18.8079	9.62219e-05	18.8269	0.000109802	18.8469	7.73621e-05	18.8469	8.76385e-05
18.7899	1.7395e-05	18.7899	0.000138062	18.8179	9.62524e-05	18.8369	0.000109894	18.8569	7.73621e-05	18.8569	8.71657e-05
18.7999	1.74438e-05	18.7999	0.000138092	18.8279	9.62524e-05	18.8469	0.000109833	18.8669	7.73621e-05	18.8669	8.7609e-05
18.8099	1.74011e-05	18.8099	0.000138062	18.8379	9.62524e-05	18.8569	0.000109863	18.8769	7.73621e-05	18.8769	8.71526e-05
18.8199	1.74194e-05	18.8199	0.000138062	18.8479	9.62524e-05	18.8669	0.000109833	18.8869	7.73315e-05	18.8869	8.76156e-05
18.8299	1.73889e-05	18.8299	0.000138031	18.8579	9.62524e-05	18.8769	0.000109894	18.8969	7.7301e-05	18.8969	8.71406e-05
18.8399	1.74225e-05	18.8399	0.000138062	18.8679	9.62524e-05	18.8869	0.000109863	18.9069	7.73315e-05	18.9069	8.76068e-05
18.8499	1.73828e-05	18.8499	0.000138031	18.8779	9.62219e-05	18.8969	0.000109924	18.9169	7.72705e-05	18.9169	8.71253e-05
18.8599	1.74316e-05	18.8599	0.000138092	18.8879	9.62524e-05	18.9069	0.000109833	18.9269	7.7301e-05	18.9269	8.75806e-05
18.8699	1.7392e-05	18.8699	0.000138062	18.8979	9.62524e-05	18.9169	0.000109894	18.9369	7.724e-05	18.9369	8.70882e-05
18.8799	1.74133e-05	18.8799	0.000138062	18.9079	9.6283e-05	18.9269	0.000109863	18.9469	7.724e-05	18.9469	8.75741e-05
18.8899	1.73798e-05	18.8899	0.000138031	18.9179	9.62524e-05	18.9369	0.000109894	18.9569	7.72095e-05	18.9569	8.70751e-05
18.8999	1.74103e-05	18.8999	0.000138062	18.9279	9.6283e-05	18.9469	0.000109833	18.9669	7.724e-05	18.9669	8.75675e-05
18.9099	1.73492e-05	18.9099	0.000138062	18.9379	9.62524e-05	18.9569	0.000109894	18.9769	7.72095e-05	18.9769	8.70751e-05
18.9199	1.74164e-05	18.9199	0.000138092	18.9479	9.62524e-05	18.9669	0.000109894	18.9869	7.72705e-05	18.9869	8.75599e-05
18.9299	1.73676e-05	18.9299	0.000138	18.9579	9.6283e-05	18.9769	0.000109924	18.9969	7.72095e-05	18.9969	8.705e-05
18.9399	1.74164e-05	18.9399	0.000138062	18.9679	9.62524e-05	18.9869	0.000109924	19.0069	7.724e-05	19.0069	8.75501e-05
18.9499	1.73676e-05	18.9499	0.000138031	18.9779	9.6283e-05	18.9969	0.000109955	19.0169	7.72095e-05	19.0169	8.70445e-05
18.9599	1.74072e-05	18.9599	0.000138092	18.9879	9.62524e-05	19.0069	0.000109955	19.0269	7.724e-05	19.0269	8.75457e-05
18.9699	1.73584e-05	18.9699	0.000138	18.9979	9.62524e-05	19.0169	0.000109985	19.0369	7.724e-05	19.0369	8.7038e-05
18.9799	1.74377e-05	18.9799	0.000138062	19.0079	9.6283e-05	19.0269	0.000109955	19.0469	7.724e-05	19.0469	8.7537e-05
18.9899	1.73615e-05	18.9899	0.000138031	19.0179	9.62524e-05	19.0369	0.000109955	19.0569	7.724e-05	19.0569	8.7015e-05
18.9999	1.73889e-05	18.9999	0.000138092	19.0279	9.6283e-05	19.0469	0.000109894	19.0669	7.724e-05	19.0669	8.75108e-05
19.0099	1.73553e-05	19.0099	0.000138031	19.0379	9.6283e-05	19.0569	0.000109924	19.0769	7.724e-05	19.0769	8.69855e-05
19.0199	1.73859e-05	19.0199	0.000138062	19.0479	9.6283e-05	19.0669	0.000109894	19.0869	7.72095e-05	19.0869	8.74987e-05
19.0299	1.73615e-05	19.0299	0.000138031	19.0579	9.62524e-05	19.0769	0.000109955	19.0969	7.724e-05	19.0969	8.6979e-05
19.0399	1.73676e-05	19.0399	0.000138092	19.0679	9.6283e-05	19.0869	0.000109863	19.1069	7.72095e-05	19.1069	8.75009e-05
19.0499	1.73431e-05	19.0499	0.000138	19.0779	9.6283e-05	19.0969	0.000109924	19.1169	7.7179e-05	19.1169	8.69681e-05
19.0599	1.73828e-05	19.0599	0.000138092	19.0879	9.63135e-05	19.1069	0.000109924	19.1269	7.7179e-05	19.1269	8.74998e-05
19.0699	1.73462e-05	19.0699	0.000138	19.0979	9.62524e-05	19.1169	0.000109955	19.1369	7.71484e-05	19.1369	8.69615e-05
19.0799	1.73767e-05	19.0799	0.000138092	19.1079	9.62524e-05	19.1269	0.000109924	19.1469	7.7179e-05	19.1469	8.74867e-05
19.0899	1.7334e-05	19.0899	0.000138031	19.1179	9.62524e-05	19.1369	0.000109985	19.1569	7.71484e-05	19.1569	8.69353e-05
19.0999	1.73645e-05	19.0999	0.000138092	19.1279	9.6283e-05	19.1469	0.000109985	19.1669	7.71484e-05	19.1669	8.74693e-05
19.1099	1.73401e-05	19.1099	0.000138	19.1379	9.6283e-05	19.1569	0.000109985	19.1769	7.71484e-05	19.1769	8.69167e-05
19.1199	1.73645e-05	19.1199	0.000138031	19.1479	9.63135e-05	19.1669	0.000109985	19.1869	7.7179e-05	19.1869	8.74507e-05
19.1299	1.73248e-05	19.1299	0.000138	19.1579	9.6283e-05	19.1769	0.000110077	19.1969	7.71484e-05	19.1969	8.69004e-05
19.1399	1.73645e-05	19.1399	0.000138062	19.1679	9.6283e-05	19.1869	0.000110046	19.2069	7.7179e-05	19.2069	8.74409e-05
19.1499	1.73187e-05	19.1499	0.000138	19.1779	9.6283e-05	19.1969	0.000110077	19.2169	7.71179e-05	19.2169	8.68895e-05
19.1599	1.73645e-05	19.1599	0.000138092	19.1879	9.6283e-05	19.2069	0.000110138	19.2269	7.71484e-05	19.2269	8.74299e-05
19.1699	1.73309e-05	19.1699	0.000138031	19.1979	9.6283e-05	19.2169	0.000110107	19.2369	7.70874e-05	19.2369	8.68785e-05
19.1799	1.73462e-05	19.1799	0.000138062	19.2079	9.6283e-05	19.2269	0.000110077	19.2469	7.71484e-05	19.2469	8.74147e-05
19.1899	1.73462e-05	19.1899	0.000138	19.2179	9.6283e-05	19.2369	0.000110107	19.2569	7.71484e-05	19.2569	8.68632e-05
19.1999	1.73309e-05	19.1999	0.000138092	19.2279	9.6283e-05	19.2469	0.000110077	19.2669	7.71484e-05	19.2669	8.74103e-05
19.2099	1.73401e-05	19.2099	0.000138	19.2379	9.62524e-05	19.2569	0.000110077	19.2769	7.71484e-05	19.2769	8.68534e-05
19.2199	1.73157e-05	19.2199	0.000138092	19.2479	9.6283e-05	19.2669	0.000110016	19.2869	7.7179e-05	19.2869	8.73983e-05
19.2299	1.73126e-05	19.2299	0.000138	19.2579	9.6283e-05	19.2769	0.000110077	19.2969	7.71484e-05	19.2969	8.68414e-05
19.2399	1.73218e-05	19.2399	0.000138062	19.2679	9.63135e-05	19.2869	0.000110016	19.3069	7.71484e-05	19.3069	8.73917e-05
19.2499	1.73279e-05	19.2499	0.000138	19.2779	9.6283e-05	19.2969	0.000110107	19.3169	7.71179e-05	19.3169	8.68327e-05
19.2599	1.73279e-05	19.2599	0.000138031	19.2879	9.63135e-05	19.3069	0.000110046	19.3269	7.70874e-05	19.3269	8.73895e-05
19.2699	1.73218e-05	19.2699	0.000137939	19.2979	9.6283e-05	19.3169	0.000110138	19.3369	7.70874e-05	19.3369	8.68185e-05
19.2799	1.72913e-05	19.2799	0.000138062	19.3079	9.63135e-05	19.3269	0.000110107	19.3469	7.70874e-05	19.3469	8.73666e-05
19.2899	1.73035e-05	19.2899	0.000138	19.3179	9.6283e-05	19.3369	0.000110168	19.3569	7.70569e-05	19.3569	8.68021e-05
19.2999	1.73157e-05	19.2999	0.000138031	19.3279	9.6344e-05	19.3469	0.000110138	19.3669	7.70874e-05	19.3669	8.73524e-05
19.3099	1.73065e-05	19.3099	0.000138	19.3379	9.6283e-05	19.3569	0.000110199	19.3769	7.70569e-05	19.3769	8.67835e-05
19.3199	1.7337e-05	19.3199	0.000138062	19.3479	9.6344e-05	19.3669	0.000110168	19.3869	7.70874e-05	19.3869	8.73481e-05
19.3299	1.73035e-05	19.3299	0.000138031	19.3579	9.63135e-05	19.3769	0.000110199	19.3969	7.70264e-05	19.3969	8.67803e-05
19.3399	1.73218e-05	19.3399	0.000138062	19.3679	9.6344e-05	19.3869	0.000110138	19.4069	7.70569e-05	19.4069	8.7335e-05
19.3499	1.72974e-05	19.3499	0.000138	19.3779	9.63135e-05	19.3969	0.000110168	19.4169	7.70264e-05	19.4169	8.67726e-05
19.3599	1.72791e-05	19.3599	0.000138062	19.3879	9.6344e-05	19.4069	0.000110107	19.4269	7.70264e-05	19.4269	8.73251e-05
19.3699	1.72943e-05	19.3699	0.000138	19.3979	9.63135e-05	19.4169	0.000110168	19.4369	7.70264e-05	19.4369	8.67595e-05
19.3799	1.72882e-05	19.3799	0.000138062	19.4079	9.6344e-05	19.4269	0.000110107	19.4469	7.70569e-05	19.4469	8.73262e-05
19.3899	1.73004e-05	19.3899	0.000138	19.4179	9.63135e-05	19.4369	0.000110168	19.4569	7.70264e-05	19.4569	8.67617e-05
19.3999	1.72882e-05	19.3999	0.000138031	19.4279	9.6344e-05	19.4469	0.000110138	19.4669	7.70569e-05	19.4669	8.73186e-05
19.4099	1.73035e-05	19.4099	0.000138031	19.4379	9.63135e-05	19.4569	0.000110199	19.4769	7.70569e-05	19.4769	8.67475e-05
19.4199	1.72791e-05	19.4199	0.000138062	19.4479	9.6344e-05	19.4669	0.000110168	19.4869	7.70874e-05	19.4869	8.73055e-05
19.4299	1.7276e-05	19.4299	0.00013797	19.4579	9.63135e-05	19.4769	0.00011026	19.4969	7.70264e-05	19.4969	8.67322e-05
19.4399	1.72943e-05	19.4399	0.000138062	19.4679	9.6344e-05	19.4869	0.000110199	19.5069	7.70264e-05	19.5069	8.72913e-05
19.4499	1.72729e-05	19.4499	0.00013797	19.4779	9.63135e-05	19.4969	0.000110291	19.5169	7.69958e-05	19.5169	8.67147e-05
19.4599	1.72699e-05	19.4599	0.000138062	19.4879	9.6344e-05	19.5069	0.00011026	19.5269	7.69958e-05	19.5269	8.72869e-05
19.4699	1.73004e-05	19.4699	0.000138	19.4979	9.63135e-05	19.5169	0.000110291	19.5369	7.69653e-05	19.5369	8.67071e-05
19.4799	1.72913e-05	19.4799	0.000138062	19.5079	9.6344e-05	19.5269	0.000110291	19.5469	7.69958e-05	19.5469	8.72738e-05
19.4899	1.72607e-05	19.4899	0.00013797	19.5179	9.6283e-05	19.5369	0.000110291	19.5569	7.69958e-05	19.5569	8.66907e-05
19.4999	1.72729e-05	19.4999	0.000138031	19.5279	9.6344e-05	19.5469	0.000110199	19.5669	7.69958e-05	19.5669	8.72629e-05
19.5099	1.7276e-05	19.5099	0.00013797	19.5379	9.63135e-05	19.5569	0.00011026	19.5769	7.69653e-05	19.5769	8.66787e-05
19.5199	1.72791e-05	19.5199	0.000138092	19.5479	9.6344e-05	19.5669	0.000110199	19.5869	7.69958e-05	19.5869	8.72552e-05
19.5299	1.72699e-05	19.5299	0.000138	19.5579	9.63135e-05	19.5769	0.000110199	19.5969	7.69653e-05	19.5969	8.66678e-05
19.5399	1.72546e-05	19.5399	0.000138062	19.5679	9.63745e-05	19.5869	0.000110199	19.6069	7.69958e-05	19.6069	8.72465e-05
19.5499	1.72668e-05	19.5499	0.000138031	19.5779	9.63135e-05	19.5969	0.00011026	19.6169	7.69653e-05	19.6169	8.66612e-05
19.5599	1.72699e-05	19.5599	0.000138062	19.5879	9.6344e-05	19.6069	0.00011026	19.6269	7.69958e-05	19.6269	8.72389e-05
19.5699	1.72729e-05	19.5699	0.000138	19.5979	9.6283e-05	19.6169	0.000110291	19.6369	7.69653e-05	19.6369	8.66492e-05
19.5799	1.72821e-05	19.5799	0.000138062	19.6079	9.6344e-05	19.6269	0.00011026	19.6469	7.69653e-05	19.6469	8.7229e-05
19.5899	1.7276e-05	19.5899	0.00013797	19.6179	9.63135e-05	19.6369	0.000110352	19.6569	7.69653e-05	19.6569	8.66372e-05
19.5999	1.72485e-05	19.5999	0.000138062	19.6279	9.63745e-05	19.6469	0.000110352	19.6669	7.69958e-05	19.6669	8.7217e-05
19.6099	1.72546e-05	19.6099	0.00013797	19.6379	9.6344e-05	19.6569	0.000110352	19.6769	7.69653e-05	19.6769	8.6623e-05
19.6199	1.72516e-05	19.6199	0.000138031	19.6479	9.63745e-05	19.6669	0.000110352	19.6869	7.69958e-05	19.6869	8.7205e-05
19.6299	1.72638e-05	19.6299	0.00013797	19.6579	9.6344e-05	19.6769	0.000110352	19.6969	7.69958e-05	19.6969	8.66056e-05
19.6399	1.72424e-05	19.6399	0.000138062	19.6679	9.63745e-05	19.6869	0.000110321	19.7069	7.69958e-05	19.7069	8.71854e-05
19.6499	1.72302e-05	19.6499	0.000138	19.6779	9.6344e-05	19.6969	0.000110382	19.7169	7.69653e-05	19.7169	8.65826e-05
19.6599	1.72546e-05	19.6599	0.000138031	19.6879	9.63745e-05	19.7069	0.000110352	19.7269	7.70264e-05	19.7269	8.71613e-05
19.6699	1.72394e-05	19.6699	0.000138	19.6979	9.6344e-05	19.7169	0.000110352	19.7369	7.69958e-05	19.7369	8.6563e-05
19.6799	1.72394e-05	19.6799	0.000138092	19.7079	9.6405e-05	19.7269	0.00011026	19.7469	7.69958e-05	19.7469	8.71471e-05
19.6899	1.72363e-05	19.6899	0.000138	19.7179	9.63745e-05	19.7369	0.000110352	19.7569	7.69958e-05	19.7569	8.6552e-05
19.6999	1.72119e-05	19.6999	0.000138031	19.7279	9.6405e-05	19.7469	0.00011026	19.7669	7.70264e-05	19.7669	8.71351e-05
19.7099	1.72363e-05	19.7099	0.00013797	19.7379	9.6344e-05	19.7569	0.000110321	19.7769	7.69958e-05	19.7769	8.65433e-05
19.7199	1.72394e-05	19.7199	0.000138031	19.7479	9.6405e-05	19.7669	0.00011026	19.7869	7.70569e-05	19.7869	8.71144e-05
19.7299	1.72424e-05	19.7299	0.000138	19.7579	9.63745e-05	19.7769	0.000110321	19.7969	7.70264e-05	19.7969	8.65313e-05
19.7399	1.7215e-05	19.7399	0.000138031	19.7679	9.6405e-05	19.7869	0.000110321	19.8069	7.70264e-05	19.8069	8.71067e-05
19.7499	1.72455e-05	19.7499	0.000138	19.7779	9.63745e-05	19.7969	0.000110382	19.8169	7.70264e-05	19.8169	8.65182e-05
19.7599	1.72241e-05	19.7599	0.000138062	19.7879	9.6405e-05	19.8069	0.000110352	19.8269	7.70264e-05	19.8269	8.70947e-05
19.7699	1.72241e-05	19.7699	0.00013797	19.7979	9.6344e-05	19.8169	0.000110382	19.8369	7.69958e-05	19.8369	8.65193e-05
19.7799	1.7218e-05	19.7799	0.000138062	19.8079	9.6405e-05	19.8269	0.000110413	19.8469	7.69958e-05	19.8469	8.70871e-05
19.7899	1.72089e-05	19.7899	0.000138	19.8179	9.6344e-05	19.8369	0.000110413	19.8569	7.69653e-05	19.8569	8.65106e-05
19.7999	1.72272e-05	19.7999	0.000138062	19.8279	9.6405e-05	19.8469	0.000110382	19.8669	7.69653e-05	19.8669	8.70882e-05
19.8099	1.72455e-05	19.8099	0.00013797	19.8379	9.6344e-05	19.8569	0.000110413	19.8769	7.69043e-05	19.8769	8.65007e-05
19.8199	1.71997e-05	19.8199	0.000138062	19.8479	9.6405e-05	19.8669	0.000110352	19.8869	7.69043e-05	19.8869	8.70598e-05
19.8299	1.7215e-05	19.8299	0.00013797	19.8579	9.6344e-05	19.8769	0.000110382	19.8969	7.68433e-05	19.8969	8.64854e-05
19.8399	1.72119e-05	19.8399	0.000138062	19.8679	9.63745e-05	19.8869	0.000110321	19.9069	7.69043e-05	19.9069	8.70489e-05
19.8499	1.72119e-05	19.8499	0.000137939	19.8779	9.63745e-05	19.8969	0.000110352	19.9169	7.68738e-05	19.9169	8.64669e-05
19.8599	1.72119e-05	19.8599	0.000138031	19.8879	9.6405e-05	19.9069	0.000110321	19.9269	7.69043e-05	19.9269	8.70347e-05
19.8699	1.7215e-05	19.8699	0.00013797	19.8979	9.63745e-05	19.9169	0.000110382	19.9369	7.68738e-05	19.9369	8.64712e-05
19.8799	1.72058e-05	19.8799	0.000138031	19.9079	9.6405e-05	19.9269	0.000110352	19.9469	7.69043e-05	19.9469	8.70216e-05
19.8899	1.72028e-05	19.8899	0.000137939	19.9179	9.6344e-05	19.9369	0.000110382	19.9569	7.68738e-05	19.9569	8.64549e-05
19.8999	1.71906e-05	19.8999	0.000138062	19.9279	9.6405e-05	19.9469	0.000110321	19.9669	7.69043e-05	19.9669	8.70117e-05
19.9099	1.71997e-05	19.9099	0.000138	19.9379	9.63745e-05	19.9569	0.000110413	19.9769	7.68738e-05	19.9769	8.64461e-05
19.9199	1.71906e-05	19.9199	0.000138092	19.9479	9.6405e-05	19.9669	0.000110382	19.9869	7.69043e-05	19.9869	8.6979e-05
19.9299	1.7215e-05	19.9299	0.00013797	19.9579	9.63745e-05	19.9769	0.000110474	19.9969	7.68738e-05	19.9969	8.64276e-05
19.9399	1.71936e-05	19.9399	0.000138031	19.9679	9.6405e-05	19.9869	0.000110413	20.0069	7.69043e-05	20.0069	8.69681e-05
19.9499	1.71875e-05	19.9499	0.000138	19.9779	9.63745e-05	19.9969	0.000110504	20.0169	7.68738e-05	20.0169	8.64156e-05
19.9599	1.71906e-05	19.9599	0.000138062	19.9879	9.6405e-05	20.0069	0.000110443	20.0269	7.69043e-05	20.0269	8.69571e-05
19.9699	1.71967e-05	19.9699	0.000138	19.9979	9.63745e-05	20.0169	0.000110504	20.0369	7.68738e-05	20.0369	8.6421e-05
19.9799	1.71875e-05	19.9799	0.000138031	20.0079	9.6405e-05	20.0269	0.000110443	20.0469	7.69043e-05	20.0469	8.69571e-05
19.9899	1.71997e-05	19.9899	0.000138	20.0179	9.63745e-05	20.0369	0.000110443	20.0569	7.68738e-05	20.0569	8.64123e-05
19.9999	1.71692e-05	19.9999	0.000138062	20.0279	9.6405e-05	20.0469	0.000110413	20.0669	7.68738e-05	20.0669	8.69375e-05
20.0099	1.72028e-05	20.0099	0.000138	20.0379	9.63745e-05	20.0569	0.000110474	20.0769	7.68433e-05	20.0769	8.63872e-05
20.0199	1.71509e-05	20.0199	0.000138062	20.0479	9.6405e-05	20.0669	0.000110413	20.0869	7.68738e-05	20.0869	8.69167e-05
20.0299	1.71753e-05	20.0299	0.000138031	20.0579	9.6405e-05	20.0769	0.000110443	20.0969	7.68127e-05	20.0969	8.63708e-05
20.0399	1.71967e-05	20.0399	0.000138031	20.0679	9.6405e-05	20.0869	0.000110413	20.1069	7.68433e-05	20.1069	8.69047e-05
20.0499	1.71753e-05	20.0499	0.000138	20.0779	9.6405e-05	20.0969	0.000110474	20.1169	7.68433e-05	20.1169	8.63642e-05
20.0599	1.71661e-05	20.0599	0.000138031	20.0879	9.64355e-05	20.1069	0.000110443	20.1269	7.68433e-05	20.1269	8.68982e-05
20.0699	1.71722e-05	20.0699	0.000138031	20.0979	9.6405e-05	20.1169	0.000110504	20.1369	7.68127e-05	20.1369	8.63653e-05
20.0799	1.71539e-05	20.0799	0.000138031	20.1079	9.64355e-05	20.1269	0.000110504	20.1469	7.68433e-05	20.1469	8.68993e-05
20.0899	1.71753e-05	20.0899	0.000138	20.1179	9.6405e-05	20.1369	0.000110596	20.1569	7.68433e-05	20.1569	8.63522e-05
20.0999	1.71509e-05	20.0999	0.000138031	20.1279	9.64355e-05	20.1469	0.000110535	20.1669	7.68433e-05	20.1669	8.68687e-05
20.1099	1.71875e-05	20.1099	0.000138	20.1379	9.6405e-05	20.1569	0.000110596	20.1769	7.68127e-05	20.1769	8.63337e-05
20.1199	1.71478e-05	20.1199	0.000138031	20.1479	9.64355e-05	20.1669	0.000110596	20.1869	7.68127e-05	20.1869	8.68425e-05
20.1299	1.71722e-05	20.1299	0.000138031	20.1579	9.6405e-05	20.1769	0.000110626	20.1969	7.68127e-05	20.1969	8.63118e-05
20.1399	1.71631e-05	20.1399	0.000138062	20.1679	9.64355e-05	20.1869	0.000110565	20.2069	7.68433e-05	20.2069	8.68218e-05
20.1499	1.71631e-05	20.1499	0.000138031	20.1779	9.64355e-05	20.1969	0.000110596	20.2169	7.68127e-05	20.2169	8.62998e-05
20.1599	1.71478e-05	20.1599	0.000138062	20.1879	9.64355e-05	20.2069	0.000110565	20.2269	7.68433e-05	20.2269	8.68032e-05
20.1699	1.71539e-05	20.1699	0.000138	20.1979	9.6405e-05	20.2169	0.000110626	20.2369	7.68127e-05	20.2369	8.62878e-05
20.1799	1.71356e-05	20.1799	0.000138031	20.2079	9.64355e-05	20.2269	0.000110565	20.2469	7.68433e-05	20.2469	8.67857e-05
20.1899	1.71539e-05	20.1899	0.000138	20.2179	9.64355e-05	20.2369	0.000110626	20.2569	7.68127e-05	20.2569	8.62823e-05
20.1999	1.71478e-05	20.1999	0.000138062	20.2279	9.64661e-05	20.2469	0.000110626	20.2669	7.68127e-05	20.2669	8.67868e-05
20.2099	1.71539e-05	20.2099	0.00013797	20.2379	9.64355e-05	20.2569	0.000110687	20.2769	7.68127e-05	20.2769	8.62769e-05
20.2199	1.71295e-05	20.2199	0.000138	20.2479	9.64355e-05	20.2669	0.000110626	20.2869	7.67822e-05	20.2869	8.67573e-05
20.2299	1.71478e-05	20.2299	0.000138	20.2579	9.64355e-05	20.2769	0.000110718	20.2969	7.67822e-05	20.2969	8.62507e-05
20.2399	1.71448e-05	20.2399	0.000138062	20.2679	9.64355e-05	20.2869	0.000110657	20.3069	7.68127e-05	20.3069	8.67268e-05
20.2499	1.71539e-05	20.2499	0.000138	20.2779	9.64355e-05	20.2969	0.000110748	20.3169	7.67822e-05	20.3169	8.62234e-05
20.2599	1.71539e-05	20.2599	0.000138031	20.2879	9.64661e-05	20.3069	0.000110718	20.3269	7.68127e-05	20.3269	8.67016e-05
20.2699	1.71295e-05	20.2699	0.000138	20.2979	9.64355e-05	20.3169	0.00011084	20.3369	7.67822e-05	20.3369	8.62048e-05
20.2799	1.71448e-05	20.2799	0.000138062	20.3079	9.64661e-05	20.3269	0.000110809	20.3469	7.68127e-05	20.3469	8.66798e-05
20.2899	1.71265e-05	20.2899	0.000138	20.3179	9.64355e-05	20.3369	0.00011084	20.3569	7.68127e-05	20.3569	8.61983e-05
20.2999	1.71265e-05	20.2999	0.000138031	20.3279	9.64661e-05	20.3469	0.000110779	20.3669	7.68127e-05	20.3669	8.66623e-05
20.3099	1.71204e-05	20.3099	0.00013797	20.3379	9.64355e-05	20.3569	0.00011084	20.3769	7.68127e-05	20.3769	8.61983e-05
20.3199	1.71112e-05	20.3199	0.000138031	20.3479	9.64661e-05	20.3669	0.000110809	20.3869	7.68127e-05	20.3869	8.66743e-05
20.3299	1.71143e-05	20.3299	0.000138	20.3579	9.64355e-05	20.3769	0.00011084	20.3969	7.68127e-05	20.3969	8.6195e-05
20.3399	1.71509e-05	20.3399	0.000138062	20.3679	9.64661e-05	20.3869	0.000110779	20.4069	7.68433e-05	20.4069	8.6646e-05
20.3499	1.71051e-05	20.3499	0.000138	20.3779	9.64661e-05	20.3969	0.000110809	20.4169	7.68127e-05	20.4169	8.61775e-05
20.3599	1.71143e-05	20.3599	0.000138031	20.3879	9.64661e-05	20.4069	0.000110779	20.4269	7.68127e-05	20.4269	8.66132e-05
20.3699	1.71143e-05	20.3699	0.00013797	20.3979	9.64661e-05	20.4169	0.00011084	20.4369	7.68127e-05	20.4369	8.61415e-05
20.3799	1.71021e-05	20.3799	0.000138092	20.4079	9.64966e-05	20.4269	0.000110779	20.4469	7.67822e-05	20.4469	8.65837e-05
20.3899	1.70959e-05	20.3899	0.000138	20.4179	9.64661e-05	20.4369	0.00011087	20.4569	7.67517e-05	20.4569	8.61207e-05
20.3999	1.71234e-05	20.3999	0.000138031	20.4279	9.64661e-05	20.4469	0.000110809	20.4669	7.67517e-05	20.4669	8.65652e-05
20.4099	1.70868e-05	20.4099	0.000138	20.4379	9.64661e-05	20.4569	0.00011084	20.4769	7.67212e-05	20.4769	8.61153e-05
20.4199	1.71265e-05	20.4199	0.000138062	20.4479	9.64966e-05	20.4669	0.000110718	20.4869	7.67212e-05	20.4869	8.65553e-05
[truncated: 18,001 more rows]
