# Supplementary material for: Redistribution of charge in a 2D/1D BiOBr/Bi2O2S heterojunction for the photoelectrocatalytic oxidation of organic pollutants in water
Source: RSC Adv. 2025 Aug 21;15(36):29680–91. doi: 10.1039/d5ra03795f (PMC12377251; doi:10.1039/d5ra03795f)
Supplement: RA-015-D5RA03795F-s003 [file RA-015-D5RA03795F-s003.xlsx]

## Sheet: B-BiOBr O1s Scan C
?
Axis	Energy	Elements=	126
D:\Data\NMISA\C11499-0524\B-BiOBr Narrows.DATA\B-BiOBr O1s Scan.VGD
Binding Energy (E)				O1s [C-O]	O1s [Metal Oxide]	O1s [C=O]	Backgnd.	Envelope	Residuals
eV		Counts / s (Residuals Ч 5)		Counts / s (Residuals Ч 5)	Counts / s (Residuals Ч 5)	Counts / s (Residuals Ч 5)	Counts / s (Residuals Ч 5)	Counts / s (Residuals Ч 5)	Counts / s (Residuals Ч 5)
545		31915.6		0	0	0	0	31915.6	0
544.8		31895.6		0	0	0	0	31895.6	0
544.6		31963.1		0	0	0	0	31963.1	0
544.4		31849.8		31926.7	31926.7	31926.7	31926.7	31926.7	-76.8841
544.2		31969.1		31832.6	31832.6	31832.6	31832.6	31832.6	136.528
544		31955.9		31782.4	31782.4	31782.4	31782.4	31782.4	173.482
543.8		31555.5		31757.4	31757.4	31757.4	31757.4	31757.4	-201.934
543.6		31581.8		31682.5	31682.5	31682.5	31682.5	31682.5	-100.699
543.4		31724.8		31648.3	31648.3	31648.3	31648.3	31648.3	76.4472
543.2		31594.4		31622.2	31622.2	31622.2	31622.2	31622.2	-27.7584
543		31785.2		31615.3	31615.3	31615.3	31615.3	31615.3	169.838
542.8		31424.8		31602.8	31602.8	31602.8	31602.8	31602.8	-177.905
542.6		31547.5		31600.8	31600.8	31600.8	31600.8	31600.8	-53.3596
542.4		31661.8		31544.9	31544.9	31544.9	31544.9	31544.9	116.907
542.2		31621		31542.5	31542.5	31542.5	31542.5	31542.5	78.5593
542		31469.5		31519.8	31519.8	31519.8	31519.8	31519.8	-50.3475
541.8		31479.4		31475.7	31475.7	31475.7	31475.7	31475.7	3.6798
541.6		31515.3		31427.8	31427.8	31427.8	31427.8	31427.8	87.5829
541.4		31464.2		31394.3	31394.3	31394.3	31394.3	31394.3	69.8406
541.2		31337.8		31391.5	31391.5	31391.5	31391.5	31391.5	-53.6518
541		31175		31350.3	31350.3	31350.3	31350.3	31350.3	-175.295
540.8		31490.6		31297.7	31297.7	31297.7	31297.7	31297.7	192.901
540.6		31318.7		31272.8	31272.8	31272.8	31272.8	31272.8	45.8911
540.4		31183.5		31268.7	31268.7	31268.7	31268.7	31268.7	-85.1578
540.2		31196.4		31184.5	31184.5	31184.5	31184.5	31184.5	11.8339
540		31295.2		31116.4	31116.4	31116.4	31116.4	31116.4	178.763
539.8		31046.4		31100.5	31100.5	31100.5	31100.5	31100.5	-54.0326
539.6		30888.7		31097.5	31097.5	31097.5	31097.5	31097.5	-208.821
539.4		31075.7		31077.3	31077.3	31077.3	31077.3	31077.3	-1.56802
539.2		31307.2		31068	31068	31068	31068	31068	239.165
539		31083.3		31052.7	31052.7	31052.7	31052.7	31052.7	30.682
538.8		31017.7		31019.1	31019.1	31019.1	31019.1	31019.1	-1.36779
538.6		30938.6		30977.8	30977.8	30977.8	30977.8	30977.8	-39.1913
538.4		30960.8		30940.5	30940.5	30940.5	30940.5	30940.5	20.2319
538.2		31060.9		30880.1	30880.1	30880.1	30880.1	30880.1	180.862
538		31098.5		30833.3	30833.3	30833.4	30833.3	30833.4	265.1
537.8		30626.1		30800.8	30800.8	30800.8	30800.8	30800.8	-174.782
537.6		30604.9		30754.8	30754.8	30754.9	30754.8	30754.9	-150.019
537.4		30934.9		30720.4	30720.4	30720.6	30720.4	30720.6	214.334
537.2		30772.6		30717.2	30717.2	30717.5	30717.2	30717.5	55.0775
537		30688.6		30717.1	30717.1	30717.9	30717.1	30717.9	-29.2732
536.8		30584.9		30714	30714	30715.7	30714	30715.7	-130.75
536.6		30662.6		30713.9	30713.9	30717.5	30713.9	30717.5	-54.828
536.4		30861.1		30713.7	30713.7	30721	30713.7	30721	140.081
536.2		30904.8		30713.5	30713.4	30727.8	30713.4	30727.9	176.905
536		30906.5		30713	30712.9	30740.3	30712.9	30740.5	165.973
535.8		31087.3		30712.6	30712.1	30762.5	30712.1	30763	324.326
535.6		30972		30712.3	30711.2	30800.5	30711.2	30801.6	170.442
535.4		31223.1		30712.6	30710	30862.4	30710	30864.9	358.15
535.2		31408.1		30714.1	30708.5	30959	30708.5	30964.6	443.53
535		31505.3		30718.6	30706.7	31103	30706.7	31114.9	390.394
534.8		31626		30728.6	30704.4	31307	30704.4	31331.2	294.802
534.6		31898		30749.3	30701.6	31580.5	30701.6	31628.2	269.755
534.4		32297.4		30788.9	30698	31924.6	30698	32015.5	281.825
534.2		32644		30860.6	30693.7	32326.8	30693.7	32493.7	150.335
534		33080		30983.8	30688.3	32755.4	30688.3	33050.9	29.0609
533.8		33540.2		31186.1	30681.7	33159.6	30681.7	33664	-123.873
533.6		34082.5		31503.1	30673.8	33476.9	30673.8	34306.2	-223.742
533.4		34854.4		31976.5	30664.4	33648.1	30664.3	34960.4	-106.029
533.2		35517.1		32648.4	30653.7	33637	30653.2	35632.7	-115.53
533		36084.9		33550.1	30641.8	33443.2	30640.1	36354.9	-270.029
532.8		37288.7		34686	30630.7	33102.7	30624.8	37169.8	118.868
532.6		38287.2		36014.2	30625.9	32674.2	30607.1	38100.1	187.084
532.4		39225.1		37430.8	30641.8	32220	30586.9	39118.9	106.215
532.2		40203.4		38768.2	30711.2	31790.6	30564	40142	61.3695
532		41022.5		39819.5	30900.9	31417.5	30538.6	41060.7	-38.1733
531.8		41929.9		40390.1	31327.8	31113.6	30511	41809.5	120.459
531.6		42276.4		40360.5	32164.2	30877.8	30481.5	42439.6	-163.143
531.4		42861.3		39730.6	33602.8	30700.2	30449.7	43134.2	-272.934
531.2		44220		38619.7	35749.4	30567.9	30415.6	44106	113.993
531		45450.6		37222.8	38438	30468.1	30378.8	45371.2	79.4055
530.8		46628		35746.7	41073.5	30389.9	30339.5	46531.1	96.9031
530.6		46923.3		34359.9	42738.4	30326.1	30298.7	46827.1	96.2261
530.4		45643.3		33168.5	42698.2	30272.9	30258.5	45622.6	20.6478
530.2		42759.8		32216.6	40955.4	30228.7	30221.4	42957.9	-198.11
530		39460.1		31501.8	38248.8	30193.2	30189.6	39564.6	-104.423
529.8		36328.3		30994.1	35498.6	30166.4	30164.8	36329.7	-1.36952
529.6		33774.8		30651.2	33299.9	30147.6	30146.8	33805.1	-30.3365
529.4		32443.1		30430.5	31817.7	30135.3	30135	32113.6	329.511
529.2		31082.9		30294.8	30944.6	30128	30127.9	31111.7	-28.7857
529		30473.9		30214.8	30486.2	30123.9	30123.8	30577.1	-103.189
528.8		30460.8		30169.4	30268.9	30121.6	30121.6	30316.7	144.085
528.6		30360.9		30144.7	30175.5	30120.5	30120.5	30199.7	161.182
528.4		30297.3		30131.7	30138.7	30119.9	30119.9	30150.5	146.764
528.2		30209.5		30125	30125.3	30119.4	30119.4	30130.9	78.6073
528		30216.7		30121.6	30120.7	30119	30119	30123.3	93.3901
527.8		30178.4		30119.8	30119.2	30118.7	30118.7	30120.3	58.0674
527.6		30291		30118.9	30118.5	30118.4	30118.4	30119	172.027
527.4		30276.5		30118.3	30118.1	30118.1	30118.1	30118.3	158.226
527.2		30273.1		30117.8	30117.7	30117.7	30117.7	30117.8	155.274
527		30281.1		30117.4	30117.3	30117.3	30117.3	30117.4	163.751
526.8		30152.7		30116.9	30116.9	30116.9	30116.9	30116.9	35.803
526.6		30368.7		30116.5	30116.5	30116.5	30116.5	30116.5	252.252
526.4		30338.6		30116.1	30116.1	30116.1	30116.1	30116.1	222.5
526.2		30201.8		30115.7	30115.7	30115.7	30115.7	30115.7	86.0611
526		30167.5		30115.5	30115.5	30115.5	30115.5	30115.5	51.9739
525.8		29989.6		30115.4	30115.4	30115.4	30115.4	30115.4	-125.77
525.6		30092.3		30133.4	30133.4	30133.4	30133.4	30133.4	-41.1381
525.4		30125.7		30151.5	30151.5	30151.5	30151.5	30151.5	-25.7789
525.2		30335.3		30169.5	30169.5	30169.5	30169.5	30169.5	165.712
525		30271.3		30187.6	30187.6	30187.6	30187.6	30187.6	83.6562
524.8		30198.2		30205.7	30205.7	30205.7	30205.7	30205.7	-7.45008
524.6		30207.2		30223.7	30223.7	30223.7	30223.7	30223.7	-16.5393
524.4		30315.1		0	0	0	0	30315.1	-3.4559e-09
524.2		30126.8		0	0	0	0	30126.8	-7.82948e-10
524		30057.1		0	0	0	0	30057.1	-1.71156e-10
523.8		30006.1		0	0	0	0	30006.1	-3.64162e-11
523.6		30017.9		0	0	0	0	30017.9	-7.28324e-12
523.4		30317.2		0	0	0	0	30317.2	0
523.2		30194		0	0	0	0	30194	0
523		30180.3		0	0	0	0	30180.3	0
522.8		30340.7		0	0	0	0	30340.7	0
522.6		30450.3		0	0	0	0	30450.3	0
522.4		30231.6		0	0	0	0	30231.6	0
522.2		30103.8		0	0	0	0	30103.8	0
522		30168		0	0	0	0	30168	0
521.8		30237.5		0	0	0	0	30237.5	0
521.6		30155.2		0	0	0	0	30155.2	0
521.4		30069.2		0	0	0	0	30069.2	0
521.2		30107.6		0	0	0	0	30107.6	0
521		30471.3		0	0	0	0	30471.3	0
520.8		30315.4		0	0	0	0	30315.4	0
520.6		30505.7		0	0	0	0	30505.7	0
520.4		30409.5		0	0	0	0	30409.5	0
520.2		30235.2		0	0	0	0	30235.2	0
520		30256.7		0	0	0	0	30256.7	0

## Sheet: B-BiOBr Bi4f Scan C
﻿
Axis	Energy	Elements=	151
D:\Data\NMISA\C11499-0524\B-BiOBr Narrows.DATA\B-BiOBr Bi4f Scan.VGD
Binding Energy (E)				Bi4f7 [Bi2O3]	Bi4f5 [Bi2O3]	Bi4f7 [?]	Bi4f5 [?]	Backgnd.	Envelope	Residuals
eV		Counts / s (Residuals × 2)		Counts / s (Residuals × 2)	Counts / s (Residuals × 2)	Counts / s (Residuals × 2)	Counts / s (Residuals × 2)	Counts / s (Residuals × 2)	Counts / s (Residuals × 2)	Counts / s (Residuals × 2)
175		20054.9		0	0	0	0	0	20054.9	0
174.8		20071.1		0	0	0	0	0	20071.1	0
174.6		19998.6		0	0	0	0	0	19998.6	0
174.4		19701.8		0	0	0	0	0	19701.8	-3.64162e-12
174.2		19598.7		0	0	0	0	0	19598.7	-1.09249e-11
174		19362.7		0	0	0	0	0	19362.7	-5.46243e-11
173.8		19114.8		0	0	0	0	0	19114.8	-2.58555e-10
173.6		18869.6		0	0	0	0	0	18869.6	-1.20173e-09
173.4		18728.9		0	0	0	0	0	18728.9	-5.33862e-09
173.2		18668.3		0	0	0	0	0	18668.3	-2.28657e-08
173		18492.1		0	0	0	0	0	18492.1	-9.43289e-08
172.8		18209.8		0	0	0	0	0	18209.8	-3.74814e-07
172.6		17719.3		0	0	0	0	0	17719.3	-1.43465e-06
172.4		17483		0	0	0	0	0	17483	-5.29011e-06
172.2		17414.5		0	0	0	0	0	17414.5	-1.87934e-05
172		17082.6		0	0	0	0	0	17082.6	-6.43279e-05
171.8		17069.6		0	0	0	0	0	17069.6	-0.000212169
171.6		17136.9		0	0	0	0	0	17136.9	-0.000674362
171.4		16975.6		0	0	0	0	0	16975.6	-0.00206571
171.2		17154.7		0	0	0	0	0	17154.7	-0.00609893
171		17076.2		0	0	0	0	0	17076.2	-0.0173576
170.8		16814		0	0	0	0	0	16814	-0.0476236
170.6		17189.2		0	0	0	0	0	17189.3	-0.125979
170.4		17421.6		0	0	0	0	0	17422	-0.321343
170.2		17428.1		0	0	0	0	0	17428.8	-0.79046
170		17340.1		0	0	0	0	0	17342	-1.87534
169.8		17251.4		0	0	0	0	0	17255.7	-4.29158
169.6		17250.8		0	0	0	0	0	17260.2	-9.47399
169.4		17339.3		17297.4	17297.4	17297.4	17317.6	17297.4	17317.6	21.7581
169.2		17302.1		17262	17262	17262	17303.5	17262	17303.5	-1.38613
169		17248		17209.2	17209.2	17209.2	17291.4	17209.2	17291.4	-43.3927
168.8		17163.7		17165.4	17165.4	17165.4	17322.6	17165.4	17322.6	-158.897
168.6		17084.4		17160.3	17160.3	17160.3	17450.4	17160.3	17450.4	-365.915
168.4		17250.6		17155.1	17155.1	17155.1	17671.2	17155.1	17671.2	-420.614
168.2		17343.5		17149.3	17149.3	17149.3	18034.6	17149.3	18034.6	-691.079
168		17881.3		17141.5	17141.5	17141.5	18604.3	17141.5	18604.4	-723.036
167.8		18827.1		17129.7	17130	17129.7	19456.3	17129.7	19456.6	-629.54
167.6		20655.2		17109.8	17111.1	17109.8	20666.7	17109.8	20668	-12.7821
167.4		22328.3		17079	17084	17079	22296.5	17079	22301.5	26.8335
167.2		24494.5		17034.4	17052.5	17034.4	24360.3	17034.4	24378.4	116.099
167		26175		16976.1	17036.5	16976.1	26793.6	16976.1	26854.1	-679.108
166.8		27929.6		16904	17089.6	16904	29417.5	16904	29603.2	-1673.62
166.6		30064.4		16817.9	17341.7	16817.9	31931.6	16817.9	32455.4	-2390.98
166.4		32809.1		16715.3	18072.1	16715.3	33949.2	16715.3	35306	-2496.9
166.2		36439.8		16591.5	19815.2	16591.5	35088.9	16591.5	38312.6	-1872.76
166		41519.8		16439.4	23451.3	16439.4	35093.1	16439.4	42105	-585.211
165.8		46880.1		16252.5	30167.3	16252.5	33923	16252.5	47837.8	-957.71
165.6		55567		16018.5	41066.9	16018.5	31764.8	16018.5	56813.2	-1246.26
165.4		65073		15726.5	56272.2	15726.6	28962	15726.5	69507.8	-4434.88
165.2		79577		15354.2	73674.8	15354.4	25885.3	15354.2	84206.1	-4629.06
165		92822.6		14890.3	88429.9	14890.8	22852.2	14890.3	96392.2	-3569.62
164.8		98681		14342.8	94688.5	14344	20082.8	14342.8	100430	-1748.73
164.6		94265.7		13756.5	89414.8	13759.3	17714.8	13756.5	93376	889.689
164.4		77478.7		13203	74831.5	13209.5	15820.6	13203	77455.5	23.1612
164.2		56151		12747.8	56644.2	12761.9	14410.8	12747.8	58321.4	-2170.44
164		38151.3		12423.8	40136.6	12453.8	13440.5	12423.8	41183.2	-3031.89
163.8		26261.1		12220.3	27920.4	12281.4	12819	12220.3	28580	-2318.91
163.6		18797.9		12104.9	20161.7	12225	12444.6	12104.9	20621.5	-1823.61
163.4		15077.1		12043.9	15812.6	12271.8	12229.8	12043.9	16226.4	-1149.33
163.2		13259.4		12013.6	13626.6	12430.8	12111.7	12013.6	14142	-882.647
163		12497.6		11998	12631.1	12734.7	12048	11998	13417.8	-920.263
162.8		13060.3		11987.2	12215.3	13240.9	12011.7	11987.2	13493.6	-433.216
162.6		14054.4		11974.4	12049.7	14029.4	11985.9	11974.3	14116.7	-62.297
162.4		16151.9		11953.1	11975.4	15194.2	11957.8	11952.5	15223.1	928.783
162.2		18312.4		11920.5	11924.3	16831.3	11920.2	11917.9	16842.7	1469.67
162		20698.4		11877.4	11868.7	19009.2	11868.1	11867.1	19022.2	1676.26
161.8		23309.4		11835.1	11799.1	21730.8	11799.2	11798.8	21768	1541.41
161.6		25870.8		11829.7	11711.9	24884.8	11712	11711.8	25003	867.846
161.4		28617.8		11956.1	11605.3	28210	11605.4	11605.3	28560.9	56.8972
161.2		32038.4		12435.9	11477.2	31294.1	11477.2	11477.1	32252.9	-214.518
161		36344.9		13727.7	11323	33636	11323	11323	36040.7	304.169
160.8		42364.1		16664	11134.9	34770.9	11134.9	11134.9	40300	2064.18
160.6		48895.8		22531.4	10905.2	34425.1	10905.2	10905.2	46051.4	2844.4
160.4		58460.6		32884.2	10620.9	32609.8	10620.9	10620.9	54873	3587.57
160.2		70237.9		48828.4	10268.1	29615.5	10268.1	10268.1	68175.9	2061.99
160		86379.5		69632.8	9823.14	25892	9823.14	9823.14	85701.7	677.786
159.8		104943		91286.4	9264	21907.4	9264	9264	103930	1013.19
159.6		119383		106716	8583.55	18043.6	8583.55	8583.55	116176	3206.7
159.4		121110		109243	7815.52	14569.9	7815.52	7815.52	115997	5112.88
159.2		106136		97423.3	7039.64	11655.2	7039.64	7039.64	102039	4097.11
159		80824.4		76261.1	6351.05	9376.94	6351.05	6351.05	79286.9	1537.42
158.8		53938.8		53339.4	5818.8	7725.41	5818.8	5818.8	55246.1	-1307.26
158.6		34333.8		34226.3	5455.02	6611.23	5455.02	5455.02	35382.6	-1048.74
158.4		21909		20922.6	5229.92	5905.38	5229.92	5229.92	21598.1	310.928
158.2		15273.2		12869.9	5095.94	5476.32	5095.94	5095.94	13250.3	2022.91
158		11730.1		8531.51	5015.2	5221.79	5015.2	5015.2	8738.09	2991.99
157.8		10054.1		6419.06	4962.33	5070.55	4962.33	4962.33	6527.29	3526.79
157.6		9102.3		5477.54	4923.88	4978.58	4923.88	4923.88	5532.24	3570.06
157.4		8592.06		5085.89	4892.7	4919.37	4892.7	4892.7	5112.57	3479.5
157.2		8037.63		4928.04	4866.14	4878.69	4866.14	4866.14	4940.59	3097.04
157		7280.73		4861.98	4843.77	4849.46	4843.77	4843.77	4867.68	2413.05
156.8		6689.86		4830.73	4825.81	4828.3	4825.81	4825.81	4833.22	1856.64
156.6		6175.61		4813.41	4812.19	4813.24	4812.19	4812.19	4814.46	1361.15
156.4		5784.27		4802.34	4802.06	4802.49	4802.06	4802.06	4802.77	981.502
156.2		5785.69		4794.09	4794.04	4794.2	4794.04	4794.04	4794.26	991.43
156		5706.67		4787.09	4787.08	4787.14	4787.08	4787.08	4787.15	919.515
155.8		5281.76		4781.28	4781.28	4781.3	4781.28	4781.28	4781.31	500.454
155.6		5409.34		4776.35	4776.35	4776.35	4776.35	4776.35	4776.35	632.981
155.4		5075.77		4772.89	4772.89	4772.89	4772.89	4772.89	4772.89	302.874
155.2		5029.75		4770.01	4770.01	4770.02	4770.01	4770.01	4770.02	259.737
155		4933.97		4768.26	4768.26	4768.26	4768.26	4768.26	4768.26	165.716
154.8		4862.76		4767	4767	4767	4767	4767	4767	95.7574
154.6		4829.49		4766.22	4766.22	4766.22	4766.22	4766.22	4766.22	63.2771
154.4		4782.39		4765.63	4765.63	4765.63	4765.63	4765.63	4765.63	16.7517
154.2		4685.03		0	0	0	0	0	4685.03	-1.95953e-06
154		4644.02		0	0	0	0	0	4644.02	-5.12996e-07
153.8		4699.19		0	0	0	0	0	4699.19	-1.29373e-07
153.6		4670.65		0	0	0	0	0	4670.65	-3.14272e-08
153.4		4655.01		0	0	0	0	0	4655.01	-7.35334e-09
153.2		4647.08		0	0	0	0	0	4647.08	-1.65694e-09
153		4568.71		0	0	0	0	0	4568.71	-3.5961e-10
152.8		4541.94		0	0	0	0	0	4541.94	-7.55636e-11
152.6		4559.31		0	0	0	0	0	4559.31	-1.54769e-11
152.4		4517.05		0	0	0	0	0	4517.05	-2.73122e-12
152.2		4473.19		0	0	0	0	0	4473.19	-9.10405e-13
152		4449.01		0	0	0	0	0	4449.01	0
151.8		4521.83		0	0	0	0	0	4521.83	0
151.6		4447.54		0	0	0	0	0	4447.54	0
151.4		4532.53		0	0	0	0	0	4532.53	0
151.2		4530.26		0	0	0	0	0	4530.26	0
151		4458.46		0	0	0	0	0	4458.46	0
150.8		4505.43		0	0	0	0	0	4505.43	0
150.6		4496.04		0	0	0	0	0	4496.04	0
150.4		4478.2		0	0	0	0	0	4478.2	0
150.2		4422		0	0	0	0	0	4422	0
150		4506.77		0	0	0	0	0	4506.77	0
149.8		4474.44		0	0	0	0	0	4474.44	0
149.6		4456.2		0	0	0	0	0	4456.2	0
149.4		4497.04		0	0	0	0	0	4497.04	0
149.2		4480.86		0	0	0	0	0	4480.86	0
149		4363.11		0	0	0	0	0	4363.11	0
148.8		4310.68		0	0	0	0	0	4310.68	0
148.6		4398.84		0	0	0	0	0	4398.84	0
148.4		4422.26		0	0	0	0	0	4422.26	0
148.2		4334.2		0	0	0	0	0	4334.2	0
148		4372.95		0	0	0	0	0	4372.95	0
147.8		4377.34		0	0	0	0	0	4377.34	0
147.6		4346.07		0	0	0	0	0	4346.07	0
147.4		4387.81		0	0	0	0	0	4387.81	0
147.2		4370.01		0	0	0	0	0	4370.01	0
147		4424.43		0	0	0	0	0	4424.43	0
146.8		4470.63		0	0	0	0	0	4470.63	0
146.6		4440.71		0	0	0	0	0	4440.71	0
146.4		4349.58		0	0	0	0	0	4349.58	0
146.2		4369.58		0	0	0	0	0	4369.58	0
146		4330.59		0	0	0	0	0	4330.59	0
145.8		4379.32		0	0	0	0	0	4379.32	0
145.6		4379.88		0	0	0	0	0	4379.88	0
145.4		4328.36		0	0	0	0	0	4328.36	0
145.2		4348.8		0	0	0	0	0	4348.8	0
145		4311.64		0	0	0	0	0	4311.64	0

## Sheet: B-BiOBr Br3d Scan C
﻿
Axis	Energy	Elements=	101
D:\Data\NMISA\C11499-0524\B-BiOBr Narrows.DATA\B-BiOBr Br3d Scan.VGD
Binding Energy (E)				Backgnd.
eV		Counts / s		Counts / s
80		3419.7		0
79.8		3448.7		0
79.6		3354.23		0
79.4		3378.38		0
79.2		3386.3		0
79		3370.75		0
78.8		3361.77		0
78.6		3359.38		0
78.4		3290.35		0
78.2		3306.54		0
78		3254.92		0
77.8		3211.68		0
77.6		3135.96		0
77.4		3130.82		0
77.2		3090.71		0
77		3052.7		0
76.8		3083.28		0
76.6		3036.29		0
76.4		3055.28		0
76.2		2984.17		0
76		2935.54		0
75.8		2942.92		0
75.6		2924.98		0
75.4		2856.66		0
75.2		2881		0
75		2904.52		0
74.8		2810.43		0
74.6		2803.64		0
74.4		2767.36		0
74.2		2807.71		0
74		2758.91		2741.43
73.8		2666.78		2721.06
73.6		2702.47		2699.09
73.4		2683.14		2693.79
73.2		2706.36		2693.75
73		2659.16		2693.7
72.8		2679.67		2693.57
72.6		2816.06		2693.33
72.4		2921.78		2692.89
72.2		3031.87		2692.2
72		3301.86		2691.19
71.8		3495.83		2689.75
71.6		3684.29		2687.86
71.4		3974.22		2685.41
71.2		4261.91		2682.27
71		4643.36		2678.36
70.8		5195.72		2673.57
70.6		5694.51		2667.76
70.4		6217.34		2660.71
70.2		6879.59		2652.15
70		7815.48		2641.93
69.8		8976.2		2630.07
69.6		9784.26		2616.81
69.4		10271.1		2602.41
69.2		10030.1		2587.06
69		9726.9		2571.02
68.8		9738.14		2554.75
68.6		9894.91		2538.92
68.4		9590.48		2524.31
68.2		8280.29		2511.43
68		6366.16		2500.49
67.8		4501.45		2491.69
67.6		3527.29		2485.14
67.4		2956.1		2480.79
67.2		2798.01		2478.26
67		2603.77		2476.94
66.8		2555.34		2476.22
66.6		2568.04		2475.81
66.4		2580.07		2475.53
66.2		2554.62		2475.36
66		2530.86		2475.23
65.8		2483.44		2475.12
65.6		2473.9		2475.03
65.4		2462.53		2474.97
65.2		2517.82		2474.92
65		2463.68		2474.9
64.8		2450.11		0
64.6		2450.6		0
64.4		2505.69		0
64.2		2550.23		0
64		2498.63		0
63.8		2452.06		0
63.6		2420.4		0
63.4		2534.86		0
63.2		2518.74		0
63		2496.49		0
62.8		2522.81		0
62.6		2518.58		0
62.4		2542.39		0
62.2		2559.54		0
62		2459.23		0
61.8		2524.22		0
61.6		2622.14		0
61.4		2564.81		0
61.2		2543.95		0
61		2547.66		0
60.8		2624.94		0
60.6		2617.71		0
60.4		2586.78		0
60.2		2617.5		0
60		2680.34		0

## Sheet: B-BiOBr Valence C
﻿
Axis	Energy	Elements=	126
D:\Data\NMISA\C11499-0524\B-BiOBr Narrows.DATA\B-BiOBr Valence.VGD
Binding Energy (E)
eV		Counts / s
20		700.553
19.8		642.087
19.6		616.27
19.4		597.806
19.2		585.13
19		585.473
18.8		582.487
18.6		583.305
18.4		603.562
18.2		591.209
18		580.602
17.8		593.752
17.6		592.597
17.4		613.617
17.2		626.586
17		598.818
16.8		610.863
16.6		625.431
16.4		603.145
16.2		620.534
16		627.141
15.8		642.007
15.6		607.288
15.4		616.511
15.2		600.3
15		594.405
14.8		590.885
14.6		598.95
14.4		561.476
14.2		530.124
14		568.473
13.8		562.879
13.6		533.864
13.4		569.653
13.2		593.764
13		619.751
12.8		638.356
12.6		585.629
12.4		567.011
12.2		558.698
12		505.417
11.8		465.411
11.6		452.669
11.4		411.086
11.2		396.923
11		382.269
10.8		358.303
10.6		354.847
10.4		349.185
10.2		318.476
10		348.933
9.8		320.714
9.6		292.868
9.4		257.748
9.2		264.602
9		271.984
8.8		276.542
8.6		322.399
8.4		345.509
8.2		389.517
8		451.814
7.8		500.382
7.6		559.72
7.4		581.717
7.2		622.76
7		618.851
6.8		656.726
6.6		729.876
6.4		856.533
6.2		960.513
6		999.994
5.8		978.14
5.6		1064.58
5.4		1057.08
5.2		1130.22
5		1171.66
4.8		1207.77
4.6		1262.32
4.4		1329.22
4.2		1341.15
4		1387.09
3.8		1365.64
3.6		1311.25
3.4		1179.88
3.2		1033.51
3		839.373
2.8		617.402
2.6		434.291
2.4		252.887
2.2		124.667
2		54.995
1.8		21.3634
1.6		14.4204
1.4		10.954
1.2		8.00701
1		8.65465
0.8		5.41341
0.6		2.65265
0.4		3.66867
0.2		2.73874
0		0.891892
-0.2		1.48849
-0.4		2.61461
-0.6		4.46947
-0.8		4.93493
-1		3.55756
-1.2		2.08809
-1.4		4.56056
-1.6		1.98198
-1.8		0.33033
-2		1.35135
-2.2		2.96396
-2.4		4.21021
-2.6		0.42042
-2.8		1.11211
-3		1.57057
-3.2		2.04505
-3.4		2.01201
-3.6		0.33033
-3.8		2.14915
-4		3.34334
-4.2		2.17518
-4.4		3.80781
-4.6		3.03103
-4.8		3.38939
-5		2.88088

## Sheet: Peak Table C
Peak Table :
	Name	Peak BE	FWHM eV	Atomic %	Q
	Br3d [Bromide]	69.1	2.3	14.01	1
	Bi4f7 [Bi2O3]	159.5	1.3	12.79	1
	Bi4f7 [?]	160.7	1.9	4.6	1
	C1s [C-C]	284.9	1.5	23.39	1
	C1s [C-O]	286	1.5	6.44	1
	C1s [C=O]	287.2	1.5	2.87	1
	C1s [O-C=O]	288.9	1.5	2.49	1
	O1s [Metal Oxide]	530.5	1.3	12.96	1
	O1s [C-O]	531.7	1.9	15.71	1
	O1s [C=O]	533.3	1.9	4.75	1

## Sheet: B-BiOBr Survey B
﻿
Axis	Energy	Elements=	1361
D:\Data\NMISA\C11499-0524\B-BiOBr Survey.DATA\B-BiOBr Survey.VGD
Binding Energy (E)				Backgnd.
eV		Counts / s		Counts / s
1350		469643		0
1349		468341		0
1348		466072		0
1347		463772		0
1346		462120		0
1345		459349		0
1344		457396		0
1343		456863		0
1342		454379		0
1341		451747		0
1340		450168		0
1339		448406		0
1338		446132		0
1337		444055		0
1336		441896		0
1335		439963		0
1334		438259		0
1333		436841		0
1332		435380		0
1331		433353		0
1330		431632		0
1329		430234		0
1328		428882		0
1327		428554		0
1326		427190		0
1325		424817		0
1324		422395		0
1323		421692		0
1322		422203		0
1321		419829		0
1320		418684		0
1319		417271		0
1318		415923		0
1317		414003		0
1316		413408		0
1315		411461		0
1314		410858		0
1313		408106		0
1312		408061		0
1311		406786		0
1310		405086		0
1309		403871		0
1308		402621		0
1307		401301		0
1306		398944		0
1305		398763		0
1304		397754		0
1303		395435		0
1302		393859		0
1301		393254		0
1300		392230		0
1299		390797		0
1298		391236		0
1297		390487		0
1296		388941		0
1295		387969		0
1294		386766		0
1293		387049		0
1292		386011		0
1291		383813		0
1290		383756		0
1289		383712		0
1288		382132		0
1287		380822		0
1286		380427		0
1285		380157		0
1284		378889		0
1283		377218		0
1282		376603		0
1281		374887		0
1280		374250		0
1279		373836		0
1278		372171		0
1277		372037		0
1276		371700		0
1275		370969		0
1274		370872		0
1273		369572		0
1272		369638		0
1271		368829		0
1270		369033		0
1269		368452		0
1268		368461		0
1267		368045		0
1266		366528		0
1265		366560		0
1264		366066		0
1263		365386		0
1262		364700		0
1261		364526		0
1260		364559		0
1259		363487		0
1258		363755		0
1257		363521		0
1256		362757		0
1255		362943		0
1254		362611		0
1253		364083		0
1252		363835		0
1251		363929		0
1250		366028		0
1249		366733		0
1248		366717		0
1247		366295		0
1246		365637		0
1245		366442		0
1244		364920		0
1243		363527		0
1242		359315		0
1241		356365		0
1240		353072		0
1239		350573		0
1238		349392		0
1237		347718		0
1236		347219		0
1235		347917		0
1234		348445		0
1233		348312		0
1232		348528		0
1231		349070		0
1230		349623		0
1229		348997		0
1228		348851		0
1227		348505		0
1226		347566		0
1225		345352		0
1224		342772		0
1223		339340		0
1222		333813		0
1221		331365		0
1220		326778		0
1219		321773		0
1218		318660		0
1217		316228		0
1216		314146		0
1215		313146		0
1214		311178		0
1213		309956		0
1212		308899		0
1211		307959		0
1210		307065		0
1209		305932		0
1208		306040		0
1207		305332		0
1206		305454		0
1205		304954		0
1204		303919		0
1203		303802		0
1202		302972		0
1201		302788		0
1200		303335		0
1199		303015		0
1198		301971		0
1197		301612		0
1196		300696		0
1195		301372		0
1194		300793		0
1193		300069		0
1192		300303		0
1191		300476		0
1190		299566		0
1189		299715		0
1188		300266		0
1187		299292		0
1186		299016		0
1185		298994		0
1184		298702		0
1183		299319		0
1182		298846		0
1181		298181		0
1180		298081		0
1179		298603		0
1178		297867		0
1177		296825		0
1176		297019		0
1175		295966		0
1174		296477		0
1173		296630		0
1172		296332		0
1171		296257		0
1170		295657		0
1169		295991		0
1168		295271		0
1167		295404		0
1166		294886		0
1165		293621		0
1164		294479		0
1163		294953		0
1162		294955		0
1161		293959		0
1160		294843		0
1159		294197		0
1158		294865		0
1157		294498		0
1156		294292		0
1155		293635		0
1154		293645		0
1153		293165		0
1152		292727		0
1151		294138		0
1150		293472		0
1149		292770		0
1148		292464		0
1147		292250		0
1146		292302		0
1145		292394		0
1144		292022		0
1143		292517		0
1142		292009		0
1141		290446		0
1140		290906		0
1139		291046		0
1138		291285		0
1137		291668		0
1136		290394		0
1135		289493		0
1134		290384		0
1133		290836		0
1132		290782		0
1131		290434		0
1130		289792		0
1129		289578		0
1128		289846		0
1127		290149		0
1126		291213		0
1125		290369		0
1124		291193		0
1123		290786		0
1122		290631		0
1121		289718		0
1120		290384		0
1119		290453		0
1118		290181		0
1117		290691		0
1116		290269		0
1115		290134		0
1114		289854		0
1113		289987		0
1112		290192		0
1111		290621		0
1110		291208		0
1109		290878		0
1108		290919		0
1107		291560		0
1106		292277		0
1105		292067		0
1104		290880		0
1103		290305		0
1102		290595		0
1101		289729		0
1100		289099		0
1099		289608		0
1098		289382		0
1097		290141		0
1096		289265		0
1095		288520		0
1094		289245		0
1093		289227		0
1092		288949		0
1091		288530		0
1090		288899		0
1089		288585		0
1088		288962		0
1087		289232		0
1086		289728		0
1085		289519		0
1084		289402		0
1083		288805		0
1082		288806		0
1081		288426		0
1080		288432		0
1079		288031		0
1078		288385		0
1077		288370		0
1076		288667		0
1075		287951		0
1074		287423		0
1073		287749		0
1072		287549		0
1071		287336		0
1070		286343		0
1069		287668		0
1068		288019		0
1067		285940		0
1066		285973		0
1065		285779		0
1064		287387		0
1063		286887		0
1062		286250		0
1061		286816		0
1060		285936		0
1059		285843		0
1058		286181		0
1057		286418		0
1056		286944		0
1055		287214		0
1054		286745		0
1053		286445		0
1052		285885		0
1051		286107		0
1050		286943		0
1049		286584		0
1048		287207		0
1047		287220		0
1046		288285		0
1045		288067		0
1044		287643		0
1043		287497		0
1042		287396		0
1041		287726		0
1040		287117		0
1039		287202		0
1038		287233		0
1037		287314		0
1036		288139		0
1035		288009		0
1034		288124		0
1033		288473		0
1032		288853		0
1031		288680		0
1030		287896		0
1029		287167		0
1028		289154		0
1027		288908		0
1026		288557		0
1025		289977		0
1024		289161		0
1023		289180		0
1022		288930		0
1021		289541		0
1020		290002		0
1019		291013		0
1018		291260		0
1017		290773		0
1016		289486		0
1015		290640		0
1014		291711		0
1013		291705		0
1012		291633		0
1011		291026		0
1010		291843		0
1009		291592		0
1008		290782		0
1007		290218		0
1006		290624		0
1005		291312		0
1004		291604		0
1003		291996		0
1002		293071		0
1001		293724		0
1000		293539		0
999		294530		0
998		295213		0
997		296620		0
996		296132		0
995		296571		0
994		295141		0
993		294135		0
992		291551		0
991		290624		0
990		290855		0
989		289538		0
988		288116		0
987		288566		0
986		288252		0
985		287469		0
984		286211		0
983		286843		0
982		287594		0
981		288326		0
980		291265		0
979		294914		0
978		298215		0
977		301040		0
976		302883		0
975		304202		0
974		303541		0
973		301489		0
972		297319		0
971		291857		0
970		287383		0
969		283816		0
968		279474		0
967		277395		0
966		275027		0
965		272252		0
964		270804		0
963		270522		0
962		270510		0
961		271146		0
960		270007		0
959		269610		0
958		269900		0
957		269406		0
956		269161		0
955		269480		0
954		270334		0
953		270721		0
952		270104		0
951		269823		0
950		270545		0
949		271172		0
948		271447		0
947		270725		0
946		271993		0
945		273437		0
944		274138		0
943		276305		0
942		275830		0
941		274982		0
940		274117		0
939		273314		0
938		273043		0
937		270893		0
936		269762		0
935		268417		0
934		267090		0
933		266604		0
932		267895		0
931		267044		0
930		265113		0
929		266071		0
928		265664		0
927		264752		0
926		264942		0
925		265118		0
924		265550		0
923		266054		0
922		266103		0
921		266051		0
920		265668		0
919		264517		0
918		264160		0
917		264308		0
916		265397		0
915		265669		0
914		265802		0
913		265804		0
912		265489		0
911		266086		0
910		266685		0
909		266808		0
908		266650		0
907		267842		0
906		267456		0
905		266702		0
904		266171		0
903		266782		0
902		266513		0
901		266761		0
900		266851		0
899		266490		0
898		267120		0
897		267479		0
896		267404		0
895		266678		0
894		267264		0
893		267511		0
892		267697		0
891		267340		0
890		267562		0
889		268138		0
888		267731		0
887		267503		0
886		268866		0
885		268448		0
884		268738		0
883		269052		0
882		268799		0
881		268912		0
880		269101		0
879		269032		0
878		269620		0
877		268161		0
876		268640		0
875		268280		0
874		268776		0
873		269757		0
872		269767		0
871		268935		0
870		268305		0
869		268929		0
868		268614		0
867		269595		0
866		269717		0
865		269155		0
864		269625		0
863		270220		0
862		270290		0
861		270277		0
860		270542		0
859		270037		0
858		269841		0
857		270241		0
856		270464		0
855		271003		0
854		271818		0
853		271712		0
852		271053		0
851		270478		0
850		270569		0
849		272667		0
848		271850		0
847		272318		0
846		272404		0
845		273170		0
844		272975		0
843		272702		0
842		272681		0
841		273053		0
840		272503		0
839		273865		0
838		274311		0
837		274045		0
836		273223		0
835		274712		0
834		273949		0
833		274794		0
832		274964		0
831		275591		0
830		275884		0
829		275025		0
828		274854		0
827		275349		0
826		276268		0
825		276532		0
824		276471		0
823		275379		0
822		275277		0
821		274391		0
820		275461		0
819		275269		0
818		274441		0
817		276682		0
816		278340		0
815		278207		0
814		278608		0
813		280420		0
812		282119		0
811		284013		0
810		284655		0
809		285026		0
808		283589		0
807		281748		0
806		279715		0
805		277401		0
804		276372		0
803		275591		0
802		274190		0
801		272835		0
800		272739		0
799		273231		0
798		272208		0
797		271956		0
796		272349		0
795		271520		0
794		270376		0
793		271085		0
792		271594		0
791		272013		0
790		272432		0
789		273178		0
788		271907		0
787		271052		0
786		271421		0
785		271984		0
784		272864		0
783		272667		0
782		272656		0
781		272131		0
780		272335		0
779		273325		0
778		274233		0
777		272368		0
776		271810		0
775		273077		0
774		274777		0
773		274806		0
772		273949		0
771		274168		0
770		274892		0
769		274566		0
768		274693		0
767		275214		0
766		276658		0
765		275318		0
764		275969		0
763		275971		0
762		277017		0
761		276162		0
760		275907		0
759		276451		0
758		276820		0
757		278135		0
756		277595		0
755		277441		0
754		277867		0
753		278047		0
752		278638		0
751		279140		0
750		279613		0
749		279328		0
748		279179		0
747		279761		0
746		279938		0
745		279987		0
744		280060		0
743		280704		0
742		280630		0
741		280574		0
740		281105		0
739		281462		0
738		281842		0
737		281508		0
736		281957		0
735		282000		0
734		282700		0
733		283879		0
732		283410		0
731		282445		0
730		282798		0
729		282933		0
728		282827		0
727		283214		0
726		284472		0
725		283700		0
724		284257		0
723		284686		0
722		284313		0
721		283864		0
720		284031		0
719		285326		0
718		285733		0
717		286496		0
716		285705		0
715		287325		0
714		288387		0
713		287798		0
712		289161		0
711		290089		0
710		290207		0
709		291042		0
708		291558		0
707		292344		0
706		292110		0
705		293058		0
704		293296		0
703		293152		0
702		293275		0
701		291377		0
700		291187		0
699		290711		0
698		290300		0
697		290081		0
696		289445		0
695		289514		0
694		288934		0
693		290204		0
692		290420		0
691		290851		0
690		292582		0
689		294435		0
688		298850		0
687		306233		0
686		315316		0
685		325864		0
684		333365		0
683		336569		0
682		331699		0
681		321643		0
680		308863		0
679		297191		0
678		287814		0
677		280956		0
676		276756		0
675		274219		0
674		271831		0
673		270477		0
672		268957		0
671		268208		0
670		268703		0
669		268111		0
668		267408		0
667		266587		0
666		266444		0
665		266874		0
664		267043		0
663		266589		0
662		265875		0
661		267083		0
660		267339		0
659		265920		0
658		266429		0
657		267336		0
656		266689		0
655		266652		0
654		266825		0
653		267259		0
652		268483		0
651		267798		0
650		267652		0
649		268239		0
648		268335		0
647		266954		0
646		267318		0
645		267575		0
644		268905		0
643		269592		0
642		268626		0
641		268890		0
640		269229		0
639		269479		0
638		270228		0
637		270083		0
636		269914		0
635		270475		0
634		270145		0
633		271075		0
632		271196		0
631		271320		0
630		271524		0
629		271188		0
628		271569		0
627		271256		0
626		272275		0
625		272723		0
624		273396		0
623		273923		0
622		273684		0
621		273925		0
620		274188		0
619		274310		0
618		274671		0
617		275121		0
616		274770		0
615		275623		0
614		275780		0
613		275890		0
612		276675		0
611		276813		0
610		276938		0
609		276951		0
608		277156		0
607		276399		0
606		276968		0
605		277569		0
604		278608		0
603		277873		0
602		279163		0
601		279259		0
600		279141		0
599		279825		0
598		279462		0
597		279785		0
596		279975		0
595		280027		0
594		281110		0
593		281362		0
592		281615		0
591		281525		0
590		282160		0
589		283486		0
588		283821		0
587		283566		0
586		283157		0
585		284240		0
584		283820		0
583		284962		0
582		285581		0
581		284994		0
580		285279		0
579		285657		0
578		285703		0
577		285032		0
576		285179		0
575		286113		0
574		285931		0
573		286290		0
572		286918		0
571		287950		0
570		287942		0
569		288477		0
568		288598		0
567		289102		0
566		289635		0
565		289190		0
564		289976		0
563		290717		0
562		290907		0
561		290770		0
560		291062		0
559		291294		0
558		290958		0
557		293118		0
556		293823		0
555		294283		0
554		295963		0
553		296768		0
552		296078		0
551		295389		0
550		296277		0
549		296035		0
548		295210		0
547		294483		0
546		292847		0
545		291556		0
544		290212		0
543		288613		0
542		286841		0
541		286053		0
540		285041		285328
539		284889		285321
538		286168		285314
537		292562		285265
536		304182		285112
535		322456		284760
534		345456		284118
533		365532		283136
532		370327		281881
531		347480		280596
530		309825		279593
529		286738		279025
528		280721		278808
527		277989		278759
526		278970		278749
525		279288		0
524		279622		0
523		279786		0
522		280608		0
521		280427		0
520		281504		0
519		282193		0
518		281862		0
517		282078		0
516		281581		0
515		282917		0
514		283959		0
513		284348		0
512		284166		0
511		284222		0
510		284096		0
509		285524		0
508		285311		0
507		284890		0
506		285650		0
505		286307		0
504		286989		0
503		288240		0
502		289016		0
501		289263		0
500		290313		0
499		292487		0
498		293192		0
497		294344		0
496		295504		0
495		297277		0
494		297802		0
493		299005		0
492		300361		0
491		301592		0
490		302566		0
489		303338		0
488		303527		0
487		303757		0
486		301328		0
485		299602		0
484		297580		0
483		296327		0
482		295365		0
481		295643		0
480		294795		0
479		296246		0
478		298399		0
477		299420		0
476		300866		0
475		303991		0
474		309358		0
473		318433		0
472		332040		0
471		353761		0
470		377875		0
469		402302		0
468		416401		0
467		409584		0
466		381382		0
465		347263		0
464		321077		0
463		302109		0
462		287679		0
461		277308		0
460		269012		0
459		263918		0
458		259780		0
457		256806		0
456		255538		0
455		254709		0
454		254022		0
453		252727		0
452		252302		0
451		253901		0
450		261000		0
449		275831		0
448		297912		0
447		329102		0
446		367381		0
445		401767		0
444		417986		0
443		399259		0
442		349982		0
441		294312		0
440		253119		0
439		227719		0
438		211021		0
437		201094		0
436		194963		0
435		190085		0
434		187168		0
433		184281		0
432		181858		0
431		180676		0
430		179974		0
429		178914		0
428		177796		0
427		177021		0
426		176389		0
425		177084		0
424		176460		0
423		176161		0
422		176081		0
421		175288		0
420		175590		0
419		175853		0
418		174746		0
417		175253		0
416		175663		0
415		174479		0
414		174200		0
413		175400		0
412		175186		0
411		174986		0
410		174427		0
409		175522		0
408		175148		0
407		175686		0
406		175139		0
405		175110		0
404		175222		0
403		175974		0
402		175144		0
401		175151		0
400		175151		0
399		175302		0
398		175789		0
397		175748		0
396		175625		0
395		176863		0
394		176953		0
393		176390		0
392		175784		0
391		176187		0
390		177362		0
389		177447		0
388		177303		0
387		177228		0
386		177479		0
385		178286		0
384		177841		0
383		177502		0
382		177812		0
381		178031		0
380		177650		0
379		178477		0
378		177820		0
377		178615		0
376		179282		0
375		179312		0
374		179441		0
373		179439		0
372		179188		0
371		179314		0
370		179774		0
369		179847		0
368		179457		0
367		179975		0
366		180335		0
365		180960		0
364		181292		0
363		181648		0
362		181815		0
361		181660		0
360		182230		0
359		182109		0
358		183144		0
357		183022		0
356		182828		0
355		183425		0
354		182878		0
353		181947		0
352		183104		0
351		184014		0
350		183952		0
349		183624		0
348		184414		0
347		183919		0
346		184913		0
345		184547		0
344		185163		0
343		185982		0
342		186400		0
341		186832		0
340		186347		0
339		186491		0
338		187322		0
337		187345		0
336		187418		0
335		188265		0
334		188300		0
333		188486		0
332		189345		0
331		189061		0
330		188777		0
329		188959		0
328		189007		0
327		189154		0
326		190422		0
325		191559		0
324		191133		0
323		190994		0
322		191863		0
321		192101		0
320		192588		0
319		193258		0
318		193153		0
317		193490		0
316		193503		0
315		193751		0
314		194958		0
313		195515		0
312		195276		0
311		194862		0
310		195713		0
309		196812		0
308		196710		0
307		196059		0
306		196896		0
305		197673		0
304		197732		0
303		197660		0
302		197317		0
301		196954		0
300		198027		0
299		197923		0
298		197237		0
297		197826		0
296		196896		0
295		197186		0
294		198003		0
293		197897		198315
292		199045		198431
291		201906		198547
290		206688		198664
289		211006		198780
288		217576		198896
287		227562		199012
286		239535		199129
285		236152		199245
284		217089		199361
283		203120		199477
282		199863		199594
281		199572		199710
280		199694		0
279		200655		0
278		201086		0
277		200790		0
276		201320		0
275		201639		0
274		201912		0
273		202157		0
272		201941		0
271		203194		0
270		204360		0
269		203931		0
268		202168		0
267		201975		0
266		202785		0
265		202347		0
264		203248		0
263		203360		0
262		203998		0
261		205744		0
260		208924		0
259		212286		0
258		215350		0
257		219445		0
256		220231		0
255		214784		0
254		209602		0
253		207167		0
252		205393		0
251		204800		0
250		205357		0
249		205137		0
248		205411		0
247		205292		0
246		206231		0
245		206948		0
244		207154		0
243		207239		0
242		207163		0
241		208311		0
240		208968		0
239		209766		0
238		210287		0
237		210498		0
236		211560		0
235		212637		0
234		214131		0
233		214419		0
232		212407		0
231		212860		0
230		213451		0
229		213985		0
228		213839		0
227		214820		0
226		215220		0
225		215887		0
224		215678		0
223		216023		0
222		216136		0
221		216885		0
220		217720		0
219		219119		0
218		219915		0
217		220223		0
216		221248		0
215		222557		0
214		222079		0
213		223141		0
212		224081		0
211		224664		0
210		224888		0
209		225472		0
208		225926		0
207		225357		0
206		225329		0
205		226045		0
204		225926		0
203		226011		0
202		226828		0
201		227145		0
200		227275		0
199		228254		0
198		228490		0
197		227268		0
196		230274		0
195		233287		0
194		235573		0
193		240630		0
192		247990		0
191		257985		0
190		267317		0
189		270288		0
188		267610		0
187		266893		0
186		273167		0
185		282337		0
184		293246		0
183		299244		0
182		287898		0
181		265352		0
180		246561		0
179		235204		0
178		226777		0
177		219817		0
176		212214		0
175		204665		0
174		197837		0
173		190191		0
172		185292		189533
171		193115		189247
170		223820		188477
169		273715		186486
168		330588		182588
167		403570		176162
166		512781		166345
165		548243		153299
164		420016		139554
163		343585		127522
162		401790		116968
161		532168		104555
160		605828		88254
159		425424		71062.2
158		170320		58007
157		76296.9		51435.2
156		60549.4		49416.7
155		55163.4		48837
154		52014.5		48555.2
153		50200.2		48399.2
152		49372.5		48313.6
151		48859.5		48266.4
150		48069.2		48231.7
149		47766.5		0
148		47910.6		0
147		48266.1		0
146		48079.1		0
145		48160.3		0
144		48052.7		0
143		47876.5		0
142		47869.9		0
141		48046.5		0
140		48329.2		0
139		48268.9		0
138		48162.3		0
137		47853.6		0
136		47714.9		0
135		48127.1		0
134		48193.8		0
133		47775.4		0
132		48261.1		0
131		48300		0
130		48514.8		0
129		49155.8		0
128		49868.5		0
127		51033		0
126		52235.9		0
125		53255.1		0
124		53940		0
123		54583.9		0
122		54494.6		0
121		54209.1		0
120		53200.1		0
119		52186.3		0
118		51199.2		0
117		50343.4		0
116		50136.4		0
115		49663.9		0
114		49403.4		0
113		48555.3		0
112		48527.2		0
111		48462.2		0
110		48492.9		0
109		48385.5		0
108		48022.9		0
107		48007.2		0
106		48557.7		0
105		49027		0
104		49526.8		0
103		50779		0
102		52060.2		0
101		53243.3		0
100		55086.3		0
99		56756.5		0
98		57919		0
97		58933.8		0
96		58774.3		0
95		57534.7		0
94		55884.8		0
93		54252.6		0
92		52398.1		0
91		50263.6		0
90		49007.4		0
89		47634.8		0
88		46324		0
87		44659.4		0
86		43267.7		0
85		41829.1		0
84		40677.8		0
83		39978.3		0
82		39219		0
81		38519.3		0
80		37377.4		0
79		36185.5		0
78		34683.1		0
77		33530.2		0
76		32705.8		33382.8
75		33912.3		33376.5
74		39151.4		33327.5
73		48390.1		33159.5
72		58582.2		32802.5
71		69676.3		32209
70		78763.2		31375.1
69		73253.5		30413.8
68		51070.5		29572.1
67		33527.6		29052.2
66		29287.2		28851.3
65		28727.9		28813.9
64		28590.9		28809.5
63		29109.7		0
62		29381.7		0
61		29966.9		0
60		30724.7		0
59		30941.9		0
58		31484.9		0
57		31700.5		0
56		32297.6		0
55		32717.1		0
54		33422.1		0
53		34257.3		0
52		34645.8		0
51		35578.1		0
50		36079.3		0
49		36279.9		0
48		35494.7		0
47		34795.7		0
46		33580.4		0
45		31790.9		0
44		30528.3		0
43		29513.9		0
42		28608.1		0
41		28331.6		0
40		28168.5		0
39		27933.4		0
38		27124.1		0
37		25847.1		0
36		25103		0
35		28288.7		0
34		36710.4		0
33		47767.3		0
32		60433.2		0
31		83506.2		0
30		106748		0
29		101349		0
28		90457.8		0
27		92192.7		0
26		67617.5		0
25		30643.6		0
24		15296.3		0
23		12185.7		0
22		10399.1		0
21		8778.35		0
20		7635.89		0
19		7020.81		0
18		6996.14		0
17		7139.24		0
16		7013.21		0
15		6522.67		0
14		6130.54		0
13		5703.75		0
12		4972.11		0
11		4611.57		0
10		4947.21		0
9		6345.85		0
8		8309.09		0
7		10131		0
6		10894.5		0
5		10920.2		0
4		9354.39		0
3		5091		0
2		1539.05		0
1		285.706		0
0		121.906		0
-1		68.7007		0
-2		45.4174		0
-3		31.2372		0
-4		21.998		0
-5		12.7668		0
-6		10.01		0
-7		10.0721		0
-8		19.6857		0
-9		19.0771		0
-10		19.6376		0

## Sheet: BiOBr O1s Scan A
﻿
Axis	Energy	Elements=	126
D:\Data\NMISA\C11499-0524\BiOBr Narrows.DATA\BiOBr O1s Scan.VGD
Binding Energy (E)				O1s [C-O]	O1s [Metal Oxide]	O1s [C=O]	Backgnd.	Envelope	Residuals
eV		Counts / s (Residuals × 5)		Counts / s (Residuals × 5)	Counts / s (Residuals × 5)	Counts / s (Residuals × 5)	Counts / s (Residuals × 5)	Counts / s (Residuals × 5)	Counts / s (Residuals × 5)
545		23802.4		0	0	0	0	23802.4	0
544.8		23662.3		0	0	0	0	23662.3	0
544.6		23702.5		0	0	0	0	23702.5	0
544.4		23525.6		23545.3	23545.3	23545.3	23545.3	23545.3	-19.7734
544.2		23263.9		23543.1	23543.1	23543.1	23543.1	23543.1	-279.188
544		23572.5		23540.7	23540.7	23540.7	23540.7	23540.7	31.7808
543.8		23523.7		23537.7	23537.7	23537.7	23537.7	23537.7	-14.023
543.6		23578.5		23533.3	23533.3	23533.3	23533.3	23533.3	45.2855
543.4		23552.9		23458.6	23458.6	23458.6	23458.6	23458.6	94.3317
543.2		23564.4		23389.5	23389.5	23389.5	23389.5	23389.5	174.865
543		23260.7		23349.3	23349.3	23349.3	23349.3	23349.3	-88.5388
542.8		23217.9		23331.1	23331.1	23331.1	23331.1	23331.1	-113.157
542.6		23327.3		23325.3	23325.3	23325.3	23325.3	23325.3	1.9702
542.4		23347		23321.7	23321.7	23321.7	23321.7	23321.7	25.2509
542.2		23392.3		23317.9	23317.9	23317.9	23317.9	23317.9	74.387
542		23197.4		23312.3	23312.3	23312.3	23312.3	23312.3	-114.873
541.8		23304.1		23304.4	23304.4	23304.4	23304.4	23304.4	-0.358616
541.6		23288.3		23294.2	23294.2	23294.2	23294.2	23294.2	-5.89229
541.4		23309.3		23281.5	23281.5	23281.5	23281.5	23281.5	27.8055
541.2		23346.9		23261.6	23261.6	23261.6	23261.6	23261.6	85.3416
541		23198.3		23217.5	23217.5	23217.5	23217.5	23217.5	-19.2248
540.8		23305.5		23162.9	23162.9	23162.9	23162.9	23162.9	142.589
540.6		23078.1		23120.2	23120.2	23120.2	23120.2	23120.2	-42.1302
540.4		22991.9		23089.7	23089.7	23089.7	23089.7	23089.7	-97.8616
540.2		23090.4		23056.7	23056.7	23056.7	23056.7	23056.7	33.6973
540		23040.6		23047.3	23047.3	23047.3	23047.3	23047.3	-6.67067
539.8		23098.7		23046.4	23046.4	23046.4	23046.4	23046.4	52.3124
539.6		23014.7		23043.9	23043.9	23043.9	23043.9	23043.9	-29.1331
539.4		23052.7		23040.3	23040.3	23040.3	23040.3	23040.3	12.3945
539.2		23112.6		23031	23031	23031	23031	23031	81.5914
539		23275		23015.1	23015.1	23015.1	23015.1	23015.1	259.955
538.8		23344.6		22993.8	22993.8	22993.8	22993.8	22993.8	350.818
538.6		23178.2		22970.8	22970.8	22970.8	22970.8	22970.8	207.418
538.4		23030.6		22947.1	22947.1	22947.1	22947.1	22947.1	83.5446
538.2		23040.2		22930.1	22930.1	22930.1	22930.1	22930.1	110.105
538		22858.2		22919	22919	22919	22919	22919	-60.833
537.8		22998.8		22914	22914	22914	22914	22914	84.7444
537.6		22847.9		22908.5	22908.5	22908.6	22908.5	22908.6	-60.6871
537.4		23024.7		22900.3	22900.3	22900.3	22900.3	22900.3	124.351
537.2		23135.7		22885	22885	22885.2	22885	22885.2	250.55
537		23134.5		22869.8	22869.8	22870.1	22869.8	22870.1	264.376
536.8		22928.8		22852.8	22852.8	22853.3	22852.8	22853.3	75.4752
536.6		22862.4		22837.1	22837.1	22838.3	22837.1	22838.3	24.117
536.4		22889.6		22826.7	22826.7	22829.2	22826.7	22829.2	60.3771
536.2		22825.5		22821.6	22821.6	22826.5	22821.6	22826.5	-0.974532
536		22851.5		22817.8	22817.8	22827.2	22817.8	22827.2	24.2822
535.8		22845.1		22815.5	22815.5	22832.7	22815.5	22832.7	12.3641
535.6		22780.9		22815.5	22815.4	22846	22815.4	22846	-65.1148
535.4		22774.3		22815.6	22815.3	22867.4	22815.3	22867.7	-93.3078
535.2		22968.2		22815.7	22815.2	22900.8	22815.2	22901.3	66.9232
535		23049.4		22816.1	22814.9	22950.4	22814.9	22951.6	97.8188
534.8		22988.5		22817.2	22814.6	23020.5	22814.6	23023.2	-34.7146
534.6		23009.5		22819.5	22813.9	23114.4	22813.9	23119.9	-110.405
534.4		23461.8		22824.3	22813.1	23232.4	22813.1	23243.6	218.178
534.2		23355		22833.9	22812.1	23370.3	22812.1	23392.1	-37.0425
534		23688.2		22851.5	22810.6	23517.2	22810.6	23558	130.167
533.8		23895.5		22882.8	22808.8	23655.8	22808.8	23729.7	165.787
533.6		23888.3		22935.9	22806.8	23764.9	22806.8	23894	-5.71405
533.4		23950.7		23021.7	22804.4	23824.3	22804.4	24041.5	-90.8579
533.2		24137.4		23153.7	22801.8	23821.7	22801.8	24173.6	-36.244
533		24211.7		23347.4	22799	23757.1	22799	24305.5	-93.7927
532.8		24388.4		23616.5	22795.9	23642.8	22795.8	24463.5	-75.0863
532.6		24675.3		23969.2	22792.4	23498.8	22792.3	24675.9	-0.567596
532.4		24859.7		24401.4	22789	23346.4	22788.2	24960.5	-100.742
532.2		25342.9		24890.3	22787.2	23202.7	22783.5	25313.3	29.6541
532		25859.2		25389.8	22793.4	23078.3	22777.9	25705.7	153.537
531.8		26243.4		25833.9	22828.1	22977.6	22771.7	26096.3	147.119
531.6		26365		26148.3	22946.9	22900	22764.5	26466.2	-101.141
531.4		26816.6		26272.1	23278.1	22842.1	22756.5	26879.3	-62.7439
531.2		27526		26177.9	24063.7	22799.3	22747.2	27546.5	-20.4791
531		28776.9		25882.3	25651.1	22766.3	22735.8	28828.1	-51.1891
530.8		31121.8		25439.4	28324.2	22738.4	22721.2	31059.7	62.1238
530.6		34109.6		24921.1	31893	22711.5	22702.2	34121.4	-11.7488
530.4		37064.3		24396.9	35265.8	22683.7	22678.7	36988.9	75.3658
530.2		37864.7		23918.6	36748.2	22654.6	22652.1	38017.2	-152.509
530		36342.7		23516.4	35413.8	22625.9	22624.7	36306.8	35.9465
529.8		32882.5		23200.8	32076	22600	22599.4	32677.9	204.536
529.6		28730.6		22968.3	28431.4	22579.3	22579	28821.1	-90.4798
529.4		25568.7		22806.7	25644.2	22564.4	22564.3	25886.7	-318.008
529.2		24221.2		22700.3	23960.4	22555	22555	24105.7	115.518
529		23473.3		22633.7	23112	22549.8	22549.8	23195.9	277.409
528.8		23074.4		22593.8	22745.5	22547	22547	22792.2	282.232
528.6		22929.3		22570.5	22607.4	22545.4	22545.4	22632.5	296.795
528.4		22807.4		22557.4	22561.6	22544.4	22544.4	22574.6	232.801
528.2		22828.3		22550.2	22547.9	22543.7	22543.7	22554.4	273.885
528		22778.4		22546.3	22544.1	22543.2	22543.2	22547.2	231.179
527.8		22710.5		22544.2	22542.9	22542.7	22542.7	22544.4	166.136
527.6		22621.1		22543	22542.4	22542.3	22542.3	22543	78.0825
527.4		22684		22542.4	22542.1	22542.1	22542.1	22542.4	141.632
527.2		22534.8		22542	22541.9	22541.9	22541.9	22542	-7.18584
527		22667		22541.7	22541.7	22541.7	22541.7	22541.7	125.24
526.8		22654.3		22541.5	22541.5	22541.5	22541.5	22541.5	112.775
526.6		22669.1		22541.3	22541.2	22541.2	22541.2	22541.3	127.863
526.4		22687.7		22541	22541	22541	22541	22541	146.709
526.2		22712.3		22540.7	22540.7	22540.7	22540.7	22540.7	171.657
526		22617.7		22540.5	22540.5	22540.5	22540.5	22540.5	77.2452
525.8		22495.7		22540.3	22540.3	22540.3	22540.3	22540.3	-44.6902
525.6		22519.3		22540.3	22540.3	22540.3	22540.3	22540.3	-20.9131
525.4		22582.6		22540.2	22540.2	22540.2	22540.2	22540.2	42.3786
525.2		22596		22577.3	22577.3	22577.3	22577.3	22577.3	18.6323
525		22507.5		22614.5	22614.5	22614.5	22614.5	22614.5	-106.97
524.8		22674.5		22651.6	22651.6	22651.6	22651.6	22651.6	22.8864
524.6		22665.7		22688.7	22688.7	22688.7	22688.7	22688.7	-23.004
524.4		22730.2		0	0	0	0	22730.2	-1.23669e-08
524.2		22865.6		0	0	0	0	22865.6	-2.96792e-09
524		22978.4		0	0	0	0	22978.4	-6.88266e-10
523.8		22721.3		0	0	0	0	22721.3	-1.52948e-10
523.6		22803.7		0	0	0	0	22803.7	-3.27746e-11
523.4		22666.8		0	0	0	0	22666.8	-7.28324e-12
523.2		22657.6		0	0	0	0	22657.6	0
523		22811.9		0	0	0	0	22811.9	0
522.8		22670.5		0	0	0	0	22670.5	0
522.6		22606.5		0	0	0	0	22606.5	0
522.4		22683.3		0	0	0	0	22683.3	0
522.2		22692.5		0	0	0	0	22692.5	0
522		22693.3		0	0	0	0	22693.3	0
521.8		22724.5		0	0	0	0	22724.5	0
521.6		22694.1		0	0	0	0	22694.1	0
521.4		22690.6		0	0	0	0	22690.6	0
521.2		22815.8		0	0	0	0	22815.8	0
521		22910.2		0	0	0	0	22910.2	0
520.8		22947.1		0	0	0	0	22947.1	0
520.6		22828.4		0	0	0	0	22828.4	0
520.4		22804.4		0	0	0	0	22804.4	0
520.2		22899.3		0	0	0	0	22899.3	0
520		22794.5		0	0	0	0	22794.5	0

## Sheet: BiOBr Bi4f Scan A
﻿
Axis	Energy	Elements=	151
D:\Data\NMISA\C11499-0524\BiOBr Narrows.DATA\BiOBr Bi4f Scan.VGD
Binding Energy (E)				Backgnd.
eV		Counts / s		Counts / s
175		16060.3		0
174.8		16037.5		0
174.6		16149.8		0
174.4		15952.9		0
174.2		15855.7		0
174		15902.4		0
173.8		15689.3		0
173.6		15764.3		0
173.4		15483.6		0
173.2		15148.3		0
173		14985.6		0
172.8		14913.2		0
172.6		14608.3		0
172.4		14151		0
172.2		13715.9		0
172		13571.8		0
171.8		13443.6		0
171.6		13117.7		0
171.4		13013.9		0
171.2		12953.3		0
171		12923.9		0
170.8		12997.6		0
170.6		13073.9		0
170.4		12975.1		0
170.2		13005.3		0
170		12955.3		0
169.8		12857.8		0
169.6		12906.2		0
169.4		12853.1		0
169.2		12912.7		0
169		12971.2		0
168.8		13120.3		0
168.6		13142.2		0
168.4		13154.7		0
168.2		12978		0
168		12658.9		0
167.8		12293.8		0
167.6		12272.1		0
167.4		12038.6		0
167.2		11727.7		0
167		11694.1		0
166.8		11387		11768.9
166.6		11324.2		11766.8
166.4		11598.9		11760.2
166.2		12611.4		11745.7
166		14858.1		11716.6
165.8		18749.4		11659.1
165.6		26825.8		11553.1
165.4		37928.6		11377.7
165.2		56426.7		11115.1
165		76021.2		10756.5
164.8		93234.5		10313.1
164.6		103263		9815.26
164.4		95926.4		9301.01
164.2		75144.3		8811.32
164		50064.6		8379.4
163.8		30043		8029.6
163.6		18634.4		7775.9
163.4		13374.5		7612.46
163.2		10799.7		7518.55
163		9570.25		7468.49
162.8		8835.7		7441.68
162.6		8291.57		7426.45
162.4		7906.92		7417.56
162.2		7586.38		7412.52
162		7336.49		7410.16
161.8		7121.69		7409.54
161.6		7013.88		7409.02
161.4		7196.4		7408.07
161.2		7705.04		7405.58
161		8856.97		7399.82
160.8		11064.9		7387.3
160.6		14699.7		7362.41
160.4		22371.4		7316.34
160.2		34952.5		7238.35
160		54936.5		7117.68
159.8		79683.3		6946.93
159.6		104949		6726.34
159.4		123665		6467.07
159.2		126398		6188.89
159		108478		5914.02
158.8		76112.3		5662.43
158.6		45608.3		5449.82
158.4		25221		5286.6
158.2		15054.2		5175.02
158		10500		5107.74
157.8		8422.72		5070.92
157.6		7464.44		5051.34
157.4		6732.67		5040.18
157.2		6352.67		5033.18
157		6019.83		5028.48
156.8		5563.71		5025.3
156.6		5260.62		5022.84
156.4		4939.38		5020.94
156.2		5024.34		5019.6
156		5082.54		0
155.8		4594.6		0
155.6		4672.02		0
155.4		4204.83		0
155.2		4294.08		0
155		4137.45		0
154.8		4086.02		0
154.6		4154.92		0
154.4		4025.82		0
154.2		3978.39		0
154		3982.9		0
153.8		3962.23		0
153.6		3931.9		0
153.4		3942.31		0
153.2		3908.59		0
153		3814.64		0
152.8		3821.79		0
152.6		3861.46		0
152.4		3868		0
152.2		3761.85		0
152		3779.81		0
151.8		3839.87		0
151.6		3804.5		0
151.4		3775.08		0
151.2		3714.86		0
151		3723.2		0
150.8		3706.7		0
150.6		3748.5		0
150.4		3713.19		0
150.2		3787.41		0
150		3790.76		0
149.8		3835.08		0
149.6		3779.66		0
149.4		3648.8		0
149.2		3618.52		0
149		3725.71		0
148.8		3639.39		0
148.6		3706.74		0
148.4		3748.02		0
148.2		3703.14		0
148		3625.08		0
147.8		3672.93		0
147.6		3666.09		0
147.4		3794.27		0
147.2		3761.38		0
147		3663.72		0
146.8		3720.47		0
146.6		3710.96		0
146.4		3681.54		0
146.2		3668.18		0
146		3698.22		0
145.8		3669.06		0
145.6		3677.04		0
145.4		3742.99		0
145.2		3735.02		0
145		3715.84		0

## Sheet: BiOBr Br3d Scan A
﻿
Axis	Energy	Elements=	101
D:\Data\NMISA\C11499-0524\BiOBr Narrows.DATA\BiOBr Br3d Scan.VGD
Binding Energy (E)				Backgnd.
eV		Counts / s		Counts / s
80		3097.25		0
79.8		3113.19		0
79.6		3072.4		0
79.4		3019.32		0
79.2		3004.28		0
79		2929.67		0
78.8		2924.44		0
78.6		2920.62		0
78.4		2946.07		0
78.2		2941.07		0
78		2859.44		0
77.8		2812.13		0
77.6		2778.36		0
77.4		2751.29		0
77.2		2747.95		0
77		2734.49		0
76.8		2686.34		0
76.6		2648.64		0
76.4		2598.2		0
76.2		2541.75		0
76		2533.3		0
75.8		2486.7		0
75.6		2547.57		0
75.4		2487.87		0
75.2		2421.92		0
75		2419.36		0
74.8		2450.58		0
74.6		2385.62		0
74.4		2364.19		0
74.2		2323.38		0
74		2282.64		2311.99
73.8		2282.79		2304.99
73.6		2278.6		2297.22
73.4		2266.66		2275.37
73.2		2307.93		2244.54
73		2248.57		2223.07
72.8		2181.83		2205.26
72.6		2140.23		2179.49
72.4		2137.67		2154.86
72.2		2153.93		2140.22
72		2086.27		2127.11
71.8		2135.51		2121.29
71.6		2146.09		2121.28
71.4		2090.07		2121.26
71.2		2099.52		2121.21
71		2168.85		2121.06
70.8		2363.27		2120.74
70.6		2562.3		2120.08
70.4		3128.32		2118.84
70.2		4007.96		2116.69
70		5325.27		2113.28
69.8		7110.7		2108.3
69.6		9154.85		2101.62
69.4		11031.1		2093.25
69.2		11925.1		2083.27
69		12508.5		2071.8
68.8		12825.6		2059.06
68.6		13533.9		2045.49
68.4		14084.1		2031.8
68.2		13650.7		2018.73
68		11642.1		2006.89
67.8		8370.31		1996.72
67.6		5609.24		1988.46
67.4		3519.02		1982.32
67.2		2822.52		1978.25
67		2321.46		1975.9
66.8		2136.38		1974.69
66.6		2100.86		1974.13
66.4		2033.73		1973.84
66.2		2021.58		1973.7
66		1975.04		1973.6
65.8		2015.18		1973.52
65.6		2053.06		1973.46
65.4		2067.4		1973.4
65.2		1990.25		1973.35
65		1993.57		1973.3
64.8		2002.36		1973.26
64.6		1968.98		1973.23
64.4		1956.09		1973.22
64.2		2002.63		1973.2
64		1991.45		1973.19
63.8		1957.06		0
63.6		1964.07		0
63.4		1972.05		0
63.2		1986.1		0
63		1980.2		0
62.8		1962.92		0
62.6		2001.17		0
62.4		2023.2		0
62.2		1963.01		0
62		1946.14		0
61.8		1969.48		0
61.6		2001.66		0
61.4		2009.49		0
61.2		1995.59		0
61		2021.29		0
60.8		2072.75		0
60.6		2047.26		0
60.4		2059.09		0
60.2		2021.14		0
60		2026.92		0

## Sheet: BiOBr Valence A
﻿
Axis	Energy	Elements=	126
D:\Data\NMISA\C11499-0524\BiOBr Narrows.DATA\BiOBr Valence.VGD
Binding Energy (E)
eV		Counts / s
20		619.331
19.8		617.795
19.6		588.086
19.4		574.632
19.2		569.873
19		563.501
18.8		545.089
18.6		540.615
18.4		509.8
18.2		495.212
18		495.427
17.8		523.156
17.6		513.299
17.4		559.293
17.2		551.759
17		565.53
16.8		588.014
16.6		617.32
16.4		599.593
16.2		647.847
16		661.955
15.8		646.442
15.6		654.631
15.4		688.351
15.2		663.175
15		618.984
14.8		583.786
14.6		573.907
14.4		493.851
14.2		480.35
14		473.989
13.8		451.511
13.6		442.844
13.4		456.587
13.2		500.589
13		497.698
12.8		522.275
12.6		545.469
12.4		554.441
12.2		542.918
12		513.006
11.8		481.101
11.6		437.272
11.4		421.577
11.2		375.61
11		330.298
10.8		287.231
10.6		275.94
10.4		270.164
10.2		267.541
10		232.762
9.8		201.899
9.6		179.369
9.4		155.506
9.2		138
9		128.73
8.8		124.12
8.6		153.224
8.4		146.979
8.2		188.687
8		241.528
7.8		294.838
7.6		339.222
7.4		366.195
7.2		379.806
7		367.671
6.8		383.427
6.6		441.207
6.4		508.831
6.2		540.323
6		591.011
5.8		622.142
5.6		666.48
5.4		713.915
5.2		760.196
5		917.646
4.8		1025.8
4.6		1149.79
4.4		1296.27
4.2		1476.48
4		1652.96
3.8		1834.66
3.6		1966.49
3.4		1984.01
3.2		1837.46
3		1611.15
2.8		1351.06
2.6		1050.1
2.4		736.121
2.2		465.528
2		187.71
1.8		63.4274
1.6		22.4264
1.4		10.4044
1.2		10.7598
1		7.76276
0.8		8.73073
0.6		4.92993
0.4		4.42843
0.2		4.6006
0		1.94394
-0.2		1.60761
-0.4		2.71672
-0.6		3.003
-0.8		0
-1		3.67067
-1.2		7.88088
-1.4		6.02102
-1.6		1.77678
-1.8		0.670671
-2		0.267267
-2.2		1.5035
-2.4		1.23223
-2.6		0.33033
-2.8		0.937938
-3		1.58158
-3.2		2.55355
-3.4		3.25025
-3.6		2.47648
-3.8		1.85786
-4		3.08609
-4.2		1.27327
-4.4		2.03203
-4.6		2.36036
-4.8		2.99299
-5		1.97397

[truncated: 4 more sheets: BiOBr Survey, Bi2O2S - O1s Scan A, Bi2O2S - Bi4f+S2p Scan A, Bi2O2S - Survey]
